# Supplementary material for: Single-Cell RNA Sequencing of Peripheral Blood Reveals Immune Cell Signatures in Alzheimer’s Disease
Source: Front Immunol. 2021 Aug 9;12:645666. doi: 10.3389/fimmu.2021.645666 (PMC8382575; doi:10.3389/fimmu.2021.645666)
Supplement: Supplementary file 2 [file DataSheet_2.xlsx]

## Sheet: Sheet1
1 represents that the differentially expressed genes from a certain immune cell subsets
Gene Symbol	B cell subsets	CD4+ T cell cell subsets	CD8+ T cell cell subsets	Monocyte_macrophages	Natural killer cell	Gene description
FLNA	1	1	1	0	0	filamin A
ITGB2	1	1	1	0	0	integrin subunit beta 2
CD74	1	1	1	0	0	CD74 molecule
LDHB	1	1	1	0	0	lactate dehydrogenase B
FCGR3A	0	0	1	1	1	Fc fragment of IgG receptor IIIa
NKG7	1	0	1	0	1	natural killer cell granule protein 7
IL2RB	0	0	1	0	1	interleukin 2 receptor subunit beta
FGFBP2	0	0	1	0	1	fibroblast growth factor binding protein 2
PPP1CA	0	1	1	0	0	protein phosphatase 1 catalytic subunit alpha
SPON2	0	0	1	0	1	spondin 2
KLRD1	0	0	1	0	1	killer cell lectin like receptor D1
S100A4	1	0	1	0	0	S100 calcium binding protein A4
PRF1	0	0	1	0	1	perforin 1
RPS26	0	1	1	0	0	ribosomal protein S26
GZMA	0	0	1	0	1	granzyme A
FTL	0	1	0	1	0	ferritin light chain
CLIC1	0	1	1	0	0	chloride intracellular channel 1
HCST	0	1	1	0	0	hematopoietic cell signal transducer
CCL5	0	1	1	0	0	C-C motif chemokine ligand 5
YWHAQ	0	1	1	0	0	tyrosine 3-monooxygenase/tryptophan 5-monooxygenase activation protein theta
HLA-DRB5	1	0	0	1	0	major histocompatibility complex, class II, DR beta 5
CCL4	0	0	1	0	1	C-C motif chemokine ligand 4
FGR	0	0	0	1	1	FGR proto-oncogene, Src family tyrosine kinase
HLA-DRA	1	0	1	0	0	major histocompatibility complex, class II, DR alpha
PLEK	0	0	1	0	1	pleckstrin
CD37	1	1	0	0	0	CD37 molecule
GNLY	0	0	1	0	1	granulysin
TGFBR3	0	0	1	0	1	transforming growth factor beta receptor 3
FCER1G	0	0	0	1	1	Fc fragment of IgE receptor Ig
CYBA	0	0	1	0	1	cytochrome b-245 alpha chain
CD99	0	1	1	0	0	CD99 molecule (Xg blood group)
SAT1	0	1	0	1	0	spermidine/spermine N1-acetyltransferase 1
LTB	0	1	1	0	0	lymphotoxin beta
LITAF	0	1	1	0	0	lipopolysaccharide induced TNF factor
CLIC3	0	0	1	0	1	chloride intracellular channel 3
GZMB	0	0	1	0	1	granzyme B
RAP1B	0	1	1	0	0	RAP1B, member of RAS oncogene family
LCP1	0	1	1	0	0	lymphocyte cytosolic protein 1
APMAP	0	0	1	0	1	adipocyte plasma membrane associated protein
CST7	0	0	1	0	1	cystatin F
ABI3	0	0	0	1	1	ABI family member 3
ADGRG1	0	0	1	0	1	adhesion G protein-coupled receptor G1
CD247	0	1	0	0	1	CD247 molecule
PSAP	0	1	0	1	0	prosaposin
RHOC	0	0	0	1	1	ras homolog family member C
SH2D2A	0	0	1	0	1	SH2 domain containing 2A
SH3BGRL3	0	1	1	0	0	SH3 domain binding glutamate rich protein like 3
S100A6	0	0	1	1	0	S100 calcium binding protein A6
IL7R	0	1	1	0	0	interleukin 7 receptor
TPST2	0	0	1	0	1	tyrosylprotein sulfotransferase 2
POU2F2	1	0	0	1	0	POU class 2 homeobox 2
HOPX	0	0	1	0	1	HOP homeobox
GZMM	0	1	1	0	0	granzyme M
PTGDS	0	0	1	0	1	prostaglandin D2 synthase
TYROBP	0	0	0	1	1	TYRO protein tyrosine kinase binding protein
CTSW	0	0	1	0	1	cathepsin W
CTSH	1	0	0	1	0	cathepsin H
IL32	1	0	1	0	0	interleukin 32
PRSS23	0	0	1	0	1	serine protease 23
FCRL6	0	0	1	0	1	Fc receptor like 6
SRGN	0	1	1	0	0	serglycin
SYNE1	0	0	1	0	0	spectrin repeat containing nuclear envelope protein 1
STK10	0	0	1	0	0	serine/threonine kinase 10
ADK	1	0	0	0	0	adenosine kinase
ALDH2	0	0	0	1	0	aldehyde dehydrogenase 2 family member
C12orf75	0	0	1	0	0	chromosome 12 open reading frame 75
FCRLA	1	0	0	0	0	Fc receptor like A
CMC1	0	0	1	0	0	C-X9-C motif containing 1
NR4A1	0	0	0	1	0	nuclear receptor subfamily 4 group A member 1
HERPUD1	1	0	0	0	0	homocysteine inducible ER protein with ubiquitin like domain 1
PRELID1	0	0	0	1	0	PRELI domain containing 1
RNF213	0	0	1	0	0	ring finger protein 213
CD8A	0	0	1	0	0	CD8a molecule
GNAI2	0	0	0	1	0	G protein subunit alpha i2
ZAP70	0	0	1	0	0	zeta chain of T cell receptor associated protein kinase 70
ARPC5L	0	0	1	0	0	actin related protein 2/3 complex subunit 5 like
CD8B	0	0	1	0	0	CD8b molecule
BANK1	1	0	0	0	0	B cell scaffold protein with ankyrin repeats 1
TNFSF10	0	0	0	1	0	TNF superfamily member 10
CPPED1	0	0	0	1	0	calcineurin like phosphoesterase domain containing 1
LYZ	0	0	0	1	0	lysozyme
ZYX	0	0	0	1	0	zyxin
AP1S2	0	0	0	1	0	adaptor related protein complex 1 subunit sigma 2
CD2	0	0	1	0	0	CD2 molecule
SLC9A3R1	0	0	1	0	0	SLC9A3 regulator 1
SP100	1	0	0	0	0	SP100 nuclear antigen
HLA-DQB1	1	0	0	0	0	major histocompatibility complex, class II, DQ beta 1
NPC2	0	0	0	1	0	NPC intracellular cholesterol transporter 2
RAB31	0	0	0	1	0	RAB31, member RAS oncogene family
MTPN	1	0	0	0	0	myotrophin
SYK	1	0	0	0	0	spleen associated tyrosine kinase
LTA4H	0	0	0	1	0	leukotriene A4 hydrolase
EFHD2	0	0	0	0	1	EF-hand domain family member D2
POLD4	1	0	0	0	0	DNA polymerase delta 4, accessory subunit
SP110	1	0	0	0	0	SP110 nuclear body protein
LYST	0	0	0	1	0	lysosomal trafficking regulator
EAF2	1	0	0	0	0	ELL associated factor 2
PAXX	0	0	1	0	0	PAXX non-homologous end joining factor
VPREB3	1	0	0	0	0	V-set pre-B cell surrogate light chain 3
HLA-DRB1	1	0	0	0	0	major histocompatibility complex, class II, DR beta 1
PYHIN1	0	0	1	0	0	pyrin and HIN domain family member 1
MACROH2A1	0	0	0	1	0	macroH2A.1 histone
TCL1A	1	0	0	0	0	T cell leukemia/lymphoma 1A
HSBP1	0	0	0	1	0	heat shock factor binding protein 1
NOP53	0	1	0	0	0	NOP53 ribosome biogenesis factor
NCF2	0	0	0	1	0	neutrophil cytosolic factor 2
RPS2	0	1	0	0	0	ribosomal protein S2
NAMPT	0	0	0	1	0	nicotinamide phosphoribosyltransferase
CYB561A3	1	0	0	0	0	cytochrome b561 family member A3
MARCHF1	1	0	0	0	0	membrane associated ring-CH-type finger 1
CLEC7A	0	0	0	1	0	C-type lectin domain containing 7A
FYB1	0	1	0	0	0	FYN binding protein 1
AGTRAP	0	0	0	1	0	angiotensin II receptor associated protein
SP140	1	0	0	0	0	SP140 nuclear body protein
LEF1	0	1	0	0	0	lymphoid enhancer binding factor 1
KLF6	0	1	0	0	0	Kruppel like factor 6
CASP1	0	0	0	1	0	caspase 1
PPP2R5C	0	0	1	0	0	protein phosphatase 2 regulatory subunit B'gamma
TMEM176B	0	0	0	1	0	transmembrane protein 176B
LGALS3	0	0	0	1	0	galectin 3
NFKBIZ	0	0	0	1	0	NFKB inhibitor zeta
CD302	0	0	0	1	0	CD302 molecule
CALR	0	1	0	0	0	calreticulin
IRF8	1	0	0	0	0	interferon regulatory factor 8
NINJ1	0	0	0	1	0	ninjurin 1
SLC31A2	0	0	0	1	0	solute carrier family 31 member 2
SERPINA1	0	0	0	1	0	serpin family A member 1
OAS1	0	0	0	1	0	2'-5'-oligoadenylate synthetase 1
BCL2A1	0	0	0	1	0	BCL2 related protein A1
TPD52	1	0	0	0	0	tumor protein D52
GNG7	1	0	0	0	0	G protein subunit gamma 7
CD83	1	0	0	0	0	CD83 molecule
CD300A	0	0	0	0	1	CD300a molecule
PARP1	1	0	0	0	0	poly(ADP-ribose) polymerase 1
IL10RA	0	0	1	0	0	interleukin 10 receptor subunit alpha
CPVL	0	0	0	1	0	carboxypeptidase vitellogenic like
RPS20	0	1	0	0	0	ribosomal protein S20
LYPD2	0	0	0	1	0	LY6/PLAUR domain containing 2
BLVRB	0	0	0	1	0	biliverdin reductase B
VCAN	0	0	0	1	0	versican
LGALS1	0	0	1	0	0	galectin 1
TFDP2	0	0	0	0	1	transcription factor Dp-2
RHOA	0	1	0	0	0	ras homolog family member A
LYN	0	0	0	1	0	LYN proto-oncogene, Src family tyrosine kinase
JCHAIN	1	0	0	0	0	joining chain of multimeric IgA and IgM
CFP	0	0	0	1	0	complement factor properdin
JAML	0	0	0	1	0	junction adhesion molecule like
TSPO	0	0	0	1	0	translocator protein
MAPKAPK3	0	0	0	1	0	MAPK activated protein kinase 3
SASH3	0	0	1	0	0	SAM and SH3 domain containing 3
FGL2	0	0	0	1	0	fibrinogen like 2
HLA-DPA1	1	0	0	0	0	major histocompatibility complex, class II, DP alpha 1
SPI1	0	0	0	1	0	Spi-1 proto-oncogene
CDKN1A	0	0	0	1	0	cyclin dependent kinase inhibitor 1A
S100A12	0	0	0	1	0	S100 calcium binding protein A12
TCIRG1	0	0	0	1	0	T cell immune regulator 1, ATPase H+ transporting V0 subunit a3
CD3G	0	0	1	0	0	CD3g molecule
RPL36A	0	1	0	0	0	ribosomal protein L36a
LILRA2	0	0	0	1	0	leukocyte immunoglobulin like receptor A2
TMEM123	0	1	0	0	0	transmembrane protein 123
PTPRE	0	0	0	1	0	protein tyrosine phosphatase receptor type E
AKNA	0	0	1	0	0	AT-hook transcription factor
MYO1F	0	0	1	0	0	myosin IF
PLAUR	0	0	0	1	0	plasminogen activator, urokinase receptor
TKT	0	0	0	1	0	transketolase
EIF3E	0	0	1	0	0	eukaryotic translation initiation factor 3 subunit E
RAB29	0	0	1	0	0	RAB29, member RAS oncogene family
CFD	0	0	0	1	0	complement factor D
PPIB	0	1	0	0	0	peptidylprolyl isomerase B
CD3D	0	0	1	0	0	CD3d molecule
AFF3	1	0	0	0	0	AF4/FMR2 family member 3
S1PR5	0	0	0	0	1	sphingosine-1-phosphate receptor 5
MPEG1	0	0	0	1	0	macrophage expressed 1
UBB	0	1	0	0	0	ubiquitin B
HSPA5	0	1	0	0	0	heat shock protein family A (Hsp70) member 5
GRB2	1	0	0	0	0	growth factor receptor bound protein 2
IL4R	1	0	0	0	0	interleukin 4 receptor
PILRA	0	0	0	1	0	paired immunoglobin like type 2 receptor alpha
CD244	0	0	0	0	1	CD244 molecule
PRKCQ-AS1	0	1	0	0	0	PRKCQ antisense RNA 1
CYBB	0	0	0	1	0	cytochrome b-245 beta chain
ATP2B1-AS1	0	0	0	1	0	ATP2B1 antisense RNA 1
LINC00926	1	0	0	0	0	long intergenic non-protein coding RNA 926
CTSC	0	0	1	0	0	cathepsin C
BLK	1	0	0	0	0	BLK proto-oncogene, Src family tyrosine kinase
RALGPS2	1	0	0	0	0	Ral GEF with PH domain and SH3 binding motif 2
RCSD1	1	0	0	0	0	RCSD domain containing 1
C15orf39	0	0	0	1	0	chromosome 15 open reading frame 39
SAMD3	0	0	1	0	0	sterile alpha motif domain containing 3
MYD88	0	0	0	1	0	MYD88 innate immune signal transduction adaptor
WARS1	0	0	0	1	0	tryptophanyl-tRNA synthetase 1
ATP6V0D1	0	0	0	1	0	ATPase H+ transporting V0 subunit d1
HMOX1	0	0	0	1	0	heme oxygenase 1
MAP3K8	1	0	0	0	0	mitogen-activated protein kinase kinase kinase 8
ASAH1	0	0	0	1	0	N-acylsphingosine amidohydrolase 1
SOD2	0	0	0	1	0	superoxide dismutase 2
MFSD10	0	0	1	0	0	major facilitator superfamily domain containing 10
KLRC1	0	0	0	0	1	killer cell lectin like receptor C1
UNC119	0	0	0	1	0	unc-119 lipid binding chaperone
TCF7L2	0	0	0	1	0	transcription factor 7 like 2
MZB1	1	0	0	0	0	marginal zone B and B1 cell specific protein
SYNGR2	1	0	0	0	0	synaptogyrin 2
BTN3A2	0	0	1	0	0	butyrophilin subfamily 3 member A2
RILPL2	0	0	0	1	0	Rab interacting lysosomal protein like 2
TIMP1	0	0	0	1	0	TIMP metallopeptidase inhibitor 1
SMARCB1	1	0	0	0	0	SWI/SNF related, matrix associated, actin dependent regulator of chromatin, subfamily b, member 1
AOAH	0	0	0	0	1	acyloxyacyl hydrolase
ADGRE5	0	1	0	0	0	adhesion G protein-coupled receptor E5
MTSS1	1	0	0	0	0	MTSS I-BAR domain containing 1
DHRS7	0	0	1	0	0	dehydrogenase/reductase 7
HSP90B1	0	1	0	0	0	heat shock protein 90 beta family member 1
SWAP70	1	0	0	0	0	switching B cell complex subunit SWAP70
KLRB1	0	1	0	0	0	killer cell lectin like receptor B1
ITGA4	0	1	0	0	0	integrin subunit alpha 4
HLA-DMB	1	0	0	0	0	major histocompatibility complex, class II, DM beta
TGFBI	0	0	0	1	0	transforming growth factor beta induced
FCER2	1	0	0	0	0	Fc fragment of IgE receptor II
VASP	0	0	0	1	0	vasodilator stimulated phosphoprotein
AKAP13	0	1	0	0	0	A-kinase anchoring protein 13
ATP2B4	0	0	1	0	0	ATPase plasma membrane Ca2+ transporting 4
HLA-C	0	0	1	0	0	major histocompatibility complex, class I, C
MYADM	0	1	0	0	0	myeloid associated differentiation marker
NOSIP	0	1	0	0	0	nitric oxide synthase interacting protein
SYNE2	0	0	1	0	0	spectrin repeat containing nuclear envelope protein 2
MIR24-2	0	0	1	0	0	microRNA 24-2
PIK3IP1	0	1	0	0	0	phosphoinositide-3-kinase interacting protein 1
SYNGR1	0	0	0	0	1	synaptogyrin 1
REL	1	0	0	0	0	REL proto-oncogene, NF-kB subunit
ID2	0	0	0	0	1	inhibitor of DNA binding 2
GLUL	0	0	0	1	0	glutamate-ammonia ligase
BID	0	0	0	1	0	BH3 interacting domain death agonist
TALDO1	0	0	0	1	0	transaldolase 1
SPN	0	0	1	0	0	sialophorin
FCMR	1	0	0	0	0	Fc fragment of IgM receptor
CST3	0	0	0	1	0	cystatin C
RGS10	0	1	0	0	0	regulator of G protein signaling 10
CDK2AP2	0	0	1	0	0	cyclin dependent kinase 2 associated protein 2
NCOA3	1	0	0	0	0	nuclear receptor coactivator 3
AIF1	0	0	0	1	0	allograft inflammatory factor 1
CD79B	1	0	0	0	0	CD79b molecule
MNDA	0	0	0	1	0	myeloid cell nuclear differentiation antigen
POU2AF1	1	0	0	0	0	POU class 2 homeobox associating factor 1
GPX1	0	0	0	1	0	glutathione peroxidase 1
GNPTAB	0	0	0	0	1	N-acetylglucosamine-1-phosphate transferase subunits alpha and beta
CSTA	0	0	0	1	0	cystatin A
GNG2	0	0	1	0	0	G protein subunit gamma 2
JUNB	0	0	1	0	0	JunB proto-oncogene, AP-1 transcription factor subunit
CD79A	1	0	0	0	0	CD79a molecule
BTG1	0	1	0	0	0	BTG anti-proliferation factor 1
NFATC3	0	0	1	0	0	nuclear factor of activated T cells 3
ZBTB38	0	0	1	0	0	zinc finger and BTB domain containing 38
IER3	0	0	0	1	0	immediate early response 3
MBP	0	0	1	0	0	myelin basic protein
SELL	0	1	0	0	0	selectin L
TTC38	0	0	0	0	1	tetratricopeptide repeat domain 38
CTSB	0	0	0	1	0	cathepsin B
SYTL3	0	0	1	0	0	synaptotagmin like 3
CD53	0	1	0	0	0	CD53 molecule
PPP1R18	0	0	1	0	0	protein phosphatase 1 regulatory subunit 18
PRKCH	0	0	1	0	0	protein kinase C eta
CTSS	0	0	0	1	0	cathepsin S
CXCL8	0	0	0	1	0	C-X-C motif chemokine ligand 8
H1-4	0	1	0	0	0	H1.4 linker histone, cluster member
CXCL16	0	0	0	1	0	C-X-C motif chemokine ligand 16
MAFB	0	0	0	1	0	MAF bZIP transcription factor B
TCF7	0	1	0	0	0	transcription factor 7
G0S2	0	0	0	1	0	G0/G1 switch 2
FPR1	0	0	0	1	0	formyl peptide receptor 1
MS4A7	0	0	0	1	0	membrane spanning 4-domains A7
CHST12	0	0	0	0	1	carbohydrate sulfotransferase 12
IFITM1	1	0	0	0	0	interferon induced transmembrane protein 1
DOK2	0	0	1	0	0	docking protein 2
RORA	0	0	1	0	0	RAR related orphan receptor A
DBI	0	0	1	0	0	diazepam binding inhibitor, acyl-CoA binding protein
ZFP36L2	0	1	0	0	0	ZFP36 ring finger protein like 2
ZEB2	0	0	1	0	0	zinc finger E-box binding homeobox 2
HCK	0	0	0	1	0	HCK proto-oncogene, Src family tyrosine kinase
NIBAN3	1	0	0	0	0	niban apoptosis regulator 3
DSTN	0	0	1	0	0	destrin, actin depolymerizing factor
ZFP36L1	1	0	0	0	0	ZFP36 ring finger protein like 1
LILRB2	0	0	0	1	0	leukocyte immunoglobulin like receptor B2
SGK1	0	0	0	1	0	serum/glucocorticoid regulated kinase 1
FCN1	0	0	0	1	0	ficolin 1
RGS2	0	0	0	1	0	regulator of G protein signaling 2
PGD	0	0	0	1	0	phosphogluconate dehydrogenase
GRN	0	0	0	1	0	granulin precursor
IL1B	0	0	0	1	0	interleukin 1 beta
DIP2A	0	0	0	0	1	disco interacting protein 2 homolog A
CAMK4	0	1	0	0	0	calcium/calmodulin dependent protein kinase IV
TNF	0	0	0	1	0	tumor necrosis factor
ANXA5	0	0	0	1	0	annexin A5
LGALS2	0	0	0	1	0	galectin 2
MT2A	0	0	1	0	0	metallothionein 2A
FYN	0	0	1	0	0	FYN proto-oncogene, Src family tyrosine kinase
YPEL5	0	1	0	0	0	yippee like 5
PLAAT4	0	0	1	0	0	phospholipase A and acyltransferase 4
RAB24	0	0	0	1	0	RAB24, member RAS oncogene family
VSIR	0	0	0	1	0	V-set immunoregulatory receptor
PPT1	0	0	0	1	0	palmitoyl-protein thioesterase 1
KLRF1	0	0	0	0	1	killer cell lectin like receptor F1
TNFSF13B	0	0	0	1	0	TNF superfamily member 13b
ITSN2	1	0	0	0	0	intersectin 2
CARD16	0	0	0	1	0	caspase recruitment domain family member 16
PRAM1	0	0	0	1	0	PML-RARA regulated adaptor molecule 1
IFI30	0	0	0	1	0	IFI30 lysosomal thiol reductase
CCR7	0	1	0	0	0	C-C motif chemokine receptor 7
APLP2	0	0	0	1	0	amyloid beta precursor like protein 2
CLEC12A	0	0	0	1	0	C-type lectin domain family 12 member A
ZNF385A	0	0	0	1	0	zinc finger protein 385A
RUNX3	0	0	1	0	0	RUNX family transcription factor 3
KLF4	0	0	0	1	0	Kruppel like factor 4
CD55	1	0	0	0	0	CD55 molecule (Cromer blood group)
TAP1	0	0	1	0	0	transporter 1, ATP binding cassette subfamily B member
ITGAM	0	0	0	0	1	integrin subunit alpha M
WDR74	0	0	0	1	0	WD repeat domain 74
CD82	1	0	0	0	0	CD82 molecule
CD68	0	0	0	1	0	CD68 molecule
SCP2	0	0	1	0	0	sterol carrier protein 2
NCR3	0	0	0	0	1	natural cytotoxicity triggering receptor 3
NEAT1	0	0	0	1	0	nuclear paraspeckle assembly transcript 1
ADA2	0	0	0	1	0	adenosine deaminase 2
EREG	0	0	0	1	0	epiregulin
BEST1	0	0	0	1	0	bestrophin 1
C20orf27	0	0	0	1	0	chromosome 20 open reading frame 27
MS4A1	1	0	0	0	0	membrane spanning 4-domains A1
LGALS9	0	0	0	1	0	galectin 9
RAB11FIP1	0	0	0	1	0	RAB11 family interacting protein 1
SNX2	1	0	0	0	0	sorting nexin 2
COTL1	0	0	0	1	0	coactosin like F-actin binding protein 1
LILRA1	0	0	0	1	0	leukocyte immunoglobulin like receptor A1
RPS29	0	1	0	0	0	ribosomal protein S29
PRKCB	1	0	0	0	0	protein kinase C beta
LSP1	0	1	0	0	0	lymphocyte specific protein 1
LILRB1	0	0	0	1	0	leukocyte immunoglobulin like receptor B1
HLA-DQA1	1	0	0	0	0	major histocompatibility complex, class II, DQ alpha 1
GIMAP5	0	1	0	0	0	GTPase, IMAP family member 5
CIAO2A	1	0	0	0	0	cytosolic iron-sulfur assembly component 2A
IDH2	0	0	1	0	0	isocitrate dehydrogenase (NADP(+)) 2
FCGRT	0	0	0	1	0	Fc fragment of IgG receptor and transporter
ADAM8	0	0	0	0	1	ADAM metallopeptidase domain 8
CCL3	0	0	0	1	0	C-C motif chemokine ligand 3
S100A8	0	0	0	1	0	S100 calcium binding protein A8
TNFAIP2	0	0	0	1	0	TNF alpha induced protein 2
CD300E	0	0	0	1	0	CD300e molecule
LILRA5	0	0	0	1	0	leukocyte immunoglobulin like receptor A5
PPP1R15A	0	1	0	0	0	protein phosphatase 1 regulatory subunit 15A
MAL	0	1	0	0	0	mal, T cell differentiation protein
ARHGAP15	0	1	0	0	0	Rho GTPase activating protein 15
THEMIS2	0	0	0	1	0	thymocyte selection associated family member 2
S100A9	0	0	0	1	0	S100 calcium binding protein A9
AHNAK	0	1	0	0	0	AHNAK nucleoprotein
BHLHE40	0	0	1	0	0	basic helix-loop-helix family member e40
MYO1G	0	0	1	0	0	myosin IG
ADAM28	1	0	0	0	0	ADAM metallopeptidase domain 28
IFITM3	0	0	0	1	0	interferon induced transmembrane protein 3
SH2D1B	0	0	0	0	1	SH2 domain containing 1B
HLA-DMA	1	0	0	0	0	major histocompatibility complex, class II, DM alpha
KLRG1	0	0	1	0	0	killer cell lectin like receptor G1
ITGAL	0	0	1	0	0	integrin subunit alpha L
ARPC3	0	1	0	0	0	actin related protein 2/3 complex subunit 3
VMP1	0	0	0	1	0	vacuole membrane protein 1
ACTB	0	1	0	0	0	actin beta
ALOX5AP	0	0	1	0	0	arachidonate 5-lipoxygenase activating protein
FLT3LG	0	1	0	0	0	fms related tyrosine kinase 3 ligand
TAGLN2	0	1	0	0	0	transgelin 2
CSF1R	0	0	0	1	0	colony stimulating factor 1 receptor
SLC7A7	0	0	0	1	0	solute carrier family 7 member 7
ODF3B	0	0	0	1	0	outer dense fiber of sperm tails 3B
MYL6	0	1	0	0	0	myosin light chain 6
OAZ1	0	1	0	0	0	ornithine decarboxylase antizyme 1
TC2N	0	1	0	0	0	tandem C2 domains, nuclear
AQP3	0	1	0	0	0	aquaporin 3 (Gill blood group)
LRP1	0	0	0	1	0	LDL receptor related protein 1
PDLIM1	1	0	0	0	0	PDZ and LIM domain 1
SLC11A1	0	0	0	1	0	solute carrier family 11 member 1
C1orf21	0	0	0	0	1	chromosome 1 open reading frame 21
PFN1	0	0	1	0	0	profilin 1
ARPC2	0	1	0	0	0	actin related protein 2/3 complex subunit 2
ZFP36	0	1	0	0	0	ZFP36 ring finger protein
MSN	0	1	0	0	0	moesin
S100A11	0	0	0	1	0	S100 calcium binding protein A11
CD19	1	0	0	0	0	CD19 molecule
FCGR2A	0	0	0	1	0	Fc fragment of IgG receptor IIa
SIGLEC10	0	0	0	1	0	sialic acid binding Ig like lectin 10
GZMH	0	0	1	0	0	granzyme H
LEPROTL1	0	1	0	0	0	leptin receptor overlapping transcript like 1
ITGB1	0	0	1	0	0	integrin subunit beta 1
NDFIP1	0	1	0	0	0	Nedd4 family interacting protein 1
MEF2C	1	0	0	0	0	myocyte enhancer factor 2C
HVCN1	1	0	0	0	0	hydrogen voltage gated channel 1
UBE2J1	1	0	0	0	0	ubiquitin conjugating enzyme E2 J1
TLN1	0	0	1	0	0	talin 1
CSF3R	0	0	0	1	0	colony stimulating factor 3 receptor
ATP2B1	1	0	0	0	0	ATPase plasma membrane Ca2+ transporting 1
PYCARD	0	0	0	1	0	PYD and CARD domain containing
CX3CR1	0	0	0	0	1	C-X3-C motif chemokine receptor 1
NCF1	1	0	0	0	0	neutrophil cytosolic factor 1
SYPL1	1	0	0	0	0	synaptophysin like 1
C5AR1	0	0	0	1	0	complement C5a receptor 1
ACTN4	0	0	1	0	0	actinin alpha 4
MCTP2	0	0	0	0	1	multiple C2 and transmembrane domain containing 2
CD14	0	0	0	1	0	CD14 molecule
TBXAS1	0	0	0	1	0	thromboxane A synthase 1
FAM49B	0	0	1	0	0	family with sequence similarity 49 member B
SNORD3A	0	0	0	1	0	small nucleolar RNA, C/D box 3A
CUX1	0	0	0	1	0	cut like homeobox 1
STX11	0	0	0	1	0	syntaxin 11
FTH1	0	0	0	1	0	ferritin heavy chain 1
PTPN6	1	0	0	0	0	protein tyrosine phosphatase non-receptor type 6
ATG3	0	0	0	1	0	autophagy related 3
CD27	0	1	0	0	0	CD27 molecule
PDIA3	0	1	0	0	0	protein disulfide isomerase family A member 3
EZR	0	1	0	0	0	ezrin
PTGDR	0	0	0	0	1	prostaglandin D2 receptor
CAPN2	0	0	1	0	0	calpain 2
RNF130	0	0	0	1	0	ring finger protein 130
MS4A6A	0	0	0	1	0	membrane spanning 4-domains A6A
ARL4C	0	0	1	0	0	ADP ribosylation factor like GTPase 4C
TNFRSF1B	0	0	0	1	0	TNF receptor superfamily member 1B
C19orf38	0	0	0	1	0	chromosome 19 open reading frame 38
NOTCH2	0	0	0	1	0	notch receptor 2
SLC2A6	0	0	0	1	0	solute carrier family 2 member 6
CD5	0	1	0	0	0	CD5 molecule
DUSP6	0	0	0	1	0	dual specificity phosphatase 6
LRRC25	0	0	0	1	0	leucine rich repeat containing 25
IGSF6	0	0	0	1	0	immunoglobulin superfamily member 6
PLPP5	1	0	0	0	0	phospholipid phosphatase 5
STXBP2	0	0	0	1	0	syntaxin binding protein 2
LST1	0	0	0	1	0	leukocyte specific transcript 1
CD63	0	0	1	0	0	CD63 molecule
KLRC3	0	0	0	0	1	killer cell lectin like receptor C3
HLA-DPB1	1	0	0	0	0	major histocompatibility complex, class II, DP beta 1
CAPG	0	0	0	1	0	capping actin protein, gelsolin like
CEP78	0	0	0	0	1	centrosomal protein 78
STOM	0	0	1	0	0	stomatin
TCF4	1	0	0	0	0	transcription factor 4
