# Supplementary material for: Single-Cell RNA Sequencing of Peripheral Blood Reveals Immune Cell Signatures in Alzheimer’s Disease
Source: Front Immunol. 2021 Aug 9;12:645666. doi: 10.3389/fimmu.2021.645666 (PMC8382575; doi:10.3389/fimmu.2021.645666)
Supplement: Supplementary file 3 [file DataSheet_3.xlsx]

## Sheet: CD4+ T cell
GO	Category	Description	counts	LogP	Log(q-value)	Gene list
GO:0046649	GO Biological Processes	lymphocyte activation	17	-9.62556	-5.31329	RHOA|ZFP36L2|CAMK4|CD5|CD27|CD74|CCR7|KLF6|FLT3LG|IL7R|ITGA4|ITGB2|LCP1|MSN|CCL5|TCF7|LEF1
GO:0045785	GO Biological Processes	positive regulation of cell adhesion	13	-9.13433	-5.12309	RHOA|CALR|CD5|CD27|CD74|CCR7|FLNA|IL7R|ITGA4|ITGB2|CCL5|ARPC2|MYADM
GO:0007159	GO Biological Processes	leukocyte cell-cell adhesion	12	-8.93822	-5.10308	RHOA|CD5|CD27|CD74|CCR7|IL7R|ITGA4|ITGB2|MSN|CCL5|SELL|EZR
GO:0030098	GO Biological Processes	lymphocyte differentiation	12	-8.71076	-5.09747	RHOA|ZFP36L2|CAMK4|CD27|CD74|CCR7|KLF6|FLT3LG|IL7R|ITGA4|TCF7|LEF1
GO:0042110	GO Biological Processes	T cell activation	13	-8.37402	-4.90685	RHOA|ZFP36L2|CAMK4|CD5|CD27|CD74|CCR7|IL7R|LCP1|MSN|CCL5|TCF7|LEF1
GO:1903039	GO Biological Processes	positive regulation of leukocyte cell-cell adhesion	9	-7.34845	-4.15013	RHOA|CD5|CD27|CD74|CCR7|IL7R|ITGA4|ITGB2|CCL5
GO:0030155	GO Biological Processes	regulation of cell adhesion	14	-7.2294	-4.06326	RHOA|CALR|CD5|CD27|CD74|CCR7|FLNA|IL7R|ITGA4|ITGB2|CCL5|ARPC2|LEF1|MYADM
GO:0022407	GO Biological Processes	regulation of cell-cell adhesion	11	-7.01983	-3.88366	RHOA|CD5|CD27|CD74|CCR7|IL7R|ITGA4|ITGB2|CCL5|LEF1|MYADM
GO:0030217	GO Biological Processes	T cell differentiation	9	-6.99128	-3.88314	RHOA|ZFP36L2|CAMK4|CD27|CD74|CCR7|IL7R|TCF7|LEF1
GO:0002521	GO Biological Processes	leukocyte differentiation	12	-6.8921	-3.84858	RHOA|ZFP36L2|CAMK4|CD27|CD74|CCR7|KLF6|FLT3LG|IL7R|ITGA4|TCF7|LEF1
GO:0022409	GO Biological Processes	positive regulation of cell-cell adhesion	9	-6.7677	-3.76277	RHOA|CD5|CD27|CD74|CCR7|IL7R|ITGA4|ITGB2|CCL5
GO:2000107	GO Biological Processes	negative regulation of leukocyte apoptotic process	5	-6.31616	-3.48102	CD27|CD74|CCR7|IL7R|CCL5
GO:1903037	GO Biological Processes	regulation of leukocyte cell-cell adhesion	9	-6.12714	-3.32003	RHOA|CD5|CD27|CD74|CCR7|IL7R|ITGA4|ITGB2|CCL5
GO:0045619	GO Biological Processes	regulation of lymphocyte differentiation	7	-5.82441	-3.05621	RHOA|ZFP36L2|CAMK4|CD27|CD74|FLT3LG|IL7R
GO:0070229	GO Biological Processes	negative regulation of lymphocyte apoptotic process	4	-5.60428	-2.90529	CD27|CD74|IL7R|CCL5
GO:0002694	GO Biological Processes	regulation of leukocyte activation	11	-5.53035	-2.8713	RHOA|ZFP36L2|CAMK4|CD5|CD27|CD74|CCR7|FLT3LG|IL7R|ITGB2|CCL5
GO:1902105	GO Biological Processes	regulation of leukocyte differentiation	8	-5.45082	-2.84021	RHOA|ZFP36L2|CAMK4|CD27|CD74|FLT3LG|IL7R|LEF1
GO:0033077	GO Biological Processes	T cell differentiation in thymus	5	-5.4449	-2.84021	ZFP36L2|CAMK4|CD74|CCR7|IL7R
GO:0051249	GO Biological Processes	regulation of lymphocyte activation	10	-5.3421	-2.78571	RHOA|ZFP36L2|CAMK4|CD5|CD27|CD74|CCR7|FLT3LG|IL7R|CCL5
GO:0002696	GO Biological Processes	positive regulation of leukocyte activation	9	-5.3322	-2.78336	RHOA|CD5|CD27|CD74|CCR7|FLT3LG|IL7R|ITGB2|CCL5
GO:0050870	GO Biological Processes	positive regulation of T cell activation	7	-5.31103	-2.77692	RHOA|CD5|CD27|CD74|CCR7|IL7R|CCL5
GO:0050865	GO Biological Processes	regulation of cell activation	11	-5.23179	-2.71887	RHOA|ZFP36L2|CAMK4|CD5|CD27|CD74|CCR7|FLT3LG|IL7R|ITGB2|CCL5
GO:0050867	GO Biological Processes	positive regulation of cell activation	9	-5.20546	-2.71584	RHOA|CD5|CD27|CD74|CCR7|FLT3LG|IL7R|ITGB2|CCL5
GO:2000106	GO Biological Processes	regulation of leukocyte apoptotic process	5	-5.07947	-2.64802	CD27|CD74|CCR7|IL7R|CCL5
GO:1902107	GO Biological Processes	positive regulation of leukocyte differentiation	6	-5.03868	-2.62951	RHOA|CD27|CD74|FLT3LG|IL7R|LEF1
GO:0050863	GO Biological Processes	regulation of T cell activation	8	-5.01775	-2.61815	RHOA|CAMK4|CD5|CD27|CD74|CCR7|IL7R|CCL5
GO:0051251	GO Biological Processes	positive regulation of lymphocyte activation	8	-4.82392	-2.51166	RHOA|CD5|CD27|CD74|CCR7|FLT3LG|IL7R|CCL5
GO:0045621	GO Biological Processes	positive regulation of lymphocyte differentiation	5	-4.81522	-2.50728	RHOA|CD27|CD74|FLT3LG|IL7R
GO:0071887	GO Biological Processes	leukocyte apoptotic process	5	-4.60232	-2.36561	CD27|CD74|CCR7|IL7R|CCL5
GO:0070233	GO Biological Processes	negative regulation of T cell apoptotic process	3	-4.56005	-2.34121	CD27|IL7R|CCL5
GO:1903706	GO Biological Processes	regulation of hemopoiesis	9	-4.5471	-2.33521	RHOA|ZFP36L2|CAMK4|CD27|CD74|FLT3LG|IL7R|ZFP36|LEF1
GO:0070228	GO Biological Processes	regulation of lymphocyte apoptotic process	4	-4.53956	-2.3311	CD27|CD74|IL7R|CCL5
GO:1903708	GO Biological Processes	positive regulation of hemopoiesis	6	-4.41746	-2.25998	RHOA|CD27|CD74|FLT3LG|IL7R|LEF1
GO:0042113	GO Biological Processes	B cell activation	7	-4.11691	-2.05992	ZFP36L2|CD27|CD74|KLF6|IL7R|ITGA4|LEF1
GO:0070227	GO Biological Processes	lymphocyte apoptotic process	4	-4.08684	-2.0394	CD27|CD74|IL7R|CCL5
GO:0045580	GO Biological Processes	regulation of T cell differentiation	5	-4.00083	-1.98082	RHOA|CAMK4|CD27|CD74|IL7R
GO:0045582	GO Biological Processes	positive regulation of T cell differentiation	4	-3.7746	-1.80476	RHOA|CD27|CD74|IL7R
GO:0070232	GO Biological Processes	regulation of T cell apoptotic process	3	-3.75041	-1.78787	CD27|IL7R|CCL5
hsa04060	KEGG Pathway	Cytokine-cytokine receptor interaction	6	-3.55671	-1.63539	CD27|CCR7|FLT3LG|IL7R|LTB|CCL5
GO:0070231	GO Biological Processes	T cell apoptotic process	3	-3.29186	-1.42536	CD27|IL7R|CCL5
GO:0030183	GO Biological Processes	B cell differentiation	4	-3.0222	-1.21644	ZFP36L2|CD27|KLF6|ITGA4
GO:0048872	GO Biological Processes	homeostasis of number of cells	5	-2.85907	-1.09083	CD74|CCR7|FLT3LG|IL7R|ZFP36
GO:0072657	GO Biological Processes	protein localization to membrane	15	-8.75097	-5.09747	ACTB|FLNA|FYB1|HSPA5|ITGA4|ITGB2|MAL|RPL36A|RPS2|RPS20|RPS26|RPS29|EZR|YWHAQ|MYADM
GO:0034109	GO Biological Processes	homotypic cell-cell adhesion	5	-5.10533	-2.6623	ACTB|CLIC1|FLNA|CD99|CCL5
GO:1990778	GO Biological Processes	protein localization to cell periphery	6	-3.21705	-1.37017	ACTB|FLNA|FYB1|MAL|EZR|MYADM
GO:0070527	GO Biological Processes	platelet aggregation	3	-2.98092	-1.18454	ACTB|CLIC1|FLNA
GO:0072659	GO Biological Processes	protein localization to plasma membrane	5	-2.74672	-0.996751	ACTB|FLNA|FYB1|EZR|MYADM
GO:0009611	GO Biological Processes	response to wounding	7	-2.12904	-0.479854	ACTB|RHOA|ZFP36L2|CLIC1|FLNA|LCP1|ZFP36
R-HSA-1500931	Reactome Gene Sets	Cell-Cell communication	3	-2.04263	-0.409794	ACTB|FLNA|FYB1
hsa04670	KEGG Pathway	Leukocyte transendothelial migration	8	-8.37739	-4.90685	ACTB|RHOA|ITGA4|ITGB2|CD99|MSN|RAP1B|EZR
hsa04810	KEGG Pathway	Regulation of actin cytoskeleton	9	-7.4527	-4.18407	ACTB|RHOA|ITGA4|ITGB2|MSN|PPP1CA|EZR|ARPC3|ARPC2
GO:0003158	GO Biological Processes	endothelium development	6	-5.19724	-2.71584	RHOA|BTG1|MSN|RAP1B|EZR|MYADM
GO:0071803	GO Biological Processes	positive regulation of podosome assembly	3	-5.12309	-2.67415	RHOA|LCP1|MSN
GO:0030855	GO Biological Processes	epithelial cell differentiation	12	-5.01659	-2.61815	AQP3|RHOA|BTG1|FLNA|MSN|PSAP|RAP1B|EZR|ZFP36|TAGLN2|LEF1|MYADM
GO:0061028	GO Biological Processes	establishment of endothelial barrier	4	-4.78585	-2.49062	MSN|RAP1B|EZR|MYADM
GO:0045198	GO Biological Processes	establishment of epithelial cell apical/basal polarity	3	-4.72147	-2.44263	RHOA|MSN|EZR
GO:0071801	GO Biological Processes	regulation of podosome assembly	3	-4.72147	-2.44263	RHOA|LCP1|MSN
GO:0035089	GO Biological Processes	establishment of apical/basal cell polarity	3	-4.41691	-2.25998	RHOA|MSN|EZR
GO:0071800	GO Biological Processes	podosome assembly	3	-4.41691	-2.25998	RHOA|LCP1|MSN
GO:0030859	GO Biological Processes	polarized epithelial cell differentiation	3	-4.351	-2.22058	RHOA|MSN|EZR
GO:0045446	GO Biological Processes	endothelial cell differentiation	5	-4.32115	-2.20755	BTG1|MSN|RAP1B|EZR|MYADM
GO:0061162	GO Biological Processes	establishment of monopolar cell polarity	3	-4.28837	-2.18651	RHOA|MSN|EZR
hsa05205	KEGG Pathway	Proteoglycans in cancer	6	-4.23189	-2.15007	ACTB|RHOA|FLNA|MSN|PPP1CA|EZR
GO:0061339	GO Biological Processes	establishment or maintenance of monopolar cell polarity	3	-4.22871	-2.14944	RHOA|MSN|EZR
GO:0001885	GO Biological Processes	endothelial cell development	4	-4.21513	-2.1384	MSN|RAP1B|EZR|MYADM
GO:0002064	GO Biological Processes	epithelial cell development	6	-4.12769	-2.0634	FLNA|MSN|PSAP|RAP1B|EZR|MYADM
GO:0030010	GO Biological Processes	establishment of cell polarity	5	-4.03053	-1.9993	RHOA|CCR7|MSN|RAP1B|EZR
GO:0008360	GO Biological Processes	regulation of cell shape	5	-3.84541	-1.84912	RHOA|ITGB2|MSN|EZR|ARHGAP15
GO:0090162	GO Biological Processes	establishment of epithelial cell polarity	3	-3.83249	-1.84064	RHOA|MSN|EZR
GO:0044319	GO Biological Processes	wound healing, spreading of cells	3	-3.79077	-1.8157	RHOA|FLNA|LCP1
GO:0090505	GO Biological Processes	epiboly involved in wound healing	3	-3.79077	-1.8157	RHOA|FLNA|LCP1
GO:0051017	GO Biological Processes	actin filament bundle assembly	5	-3.76582	-1.79795	RHOA|FLNA|LCP1|HSP90B1|EZR
GO:0090504	GO Biological Processes	epiboly	3	-3.75041	-1.78787	RHOA|FLNA|LCP1
GO:0061572	GO Biological Processes	actin filament bundle organization	5	-3.71461	-1.76407	RHOA|FLNA|LCP1|HSP90B1|EZR
hsa04530	KEGG Pathway	Tight junction	5	-3.59251	-1.66586	ACTB|RHOA|MSN|MYL6|EZR
R-HSA-8950505	Reactome Gene Sets	Gene and protein expression by JAK-STAT signaling after Interleukin-12 stimulation	3	-3.56633	-1.64224	LCP1|MSN|RAP1B
GO:0008361	GO Biological Processes	regulation of cell size	5	-3.47812	-1.5724	RHOA|IL7R|MSN|EZR|TMEM123
GO:0045197	GO Biological Processes	establishment or maintenance of epithelial cell apical/basal polarity	3	-3.34773	-1.46843	RHOA|MSN|EZR
GO:0035722	GO Biological Processes	interleukin-12-mediated signaling pathway	3	-3.29186	-1.42536	LCP1|MSN|RAP1B
R-HSA-437239	Reactome Gene Sets	Recycling pathway of L1	3	-3.29186	-1.42536	ACTB|MSN|EZR
R-HSA-9020591	Reactome Gene Sets	Interleukin-12 signaling	3	-3.29186	-1.42536	LCP1|MSN|RAP1B
GO:0035088	GO Biological Processes	establishment or maintenance of apical/basal cell polarity	3	-3.26486	-1.40897	RHOA|MSN|EZR
GO:0061245	GO Biological Processes	establishment or maintenance of bipolar cell polarity	3	-3.26486	-1.40897	RHOA|MSN|EZR
GO:0071349	GO Biological Processes	cellular response to interleukin-12	3	-3.23846	-1.38709	LCP1|MSN|RAP1B
GO:0070671	GO Biological Processes	response to interleukin-12	3	-3.21262	-1.36723	LCP1|MSN|RAP1B
GO:0007163	GO Biological Processes	establishment or maintenance of cell polarity	5	-3.15482	-1.32112	RHOA|CCR7|MSN|RAP1B|EZR
GO:1902115	GO Biological Processes	regulation of organelle assembly	5	-3.08255	-1.26583	RHOA|LCP1|MSN|EZR|AKAP13
GO:0002011	GO Biological Processes	morphogenesis of an epithelial sheet	3	-3.06828	-1.25295	RHOA|FLNA|LCP1
R-HSA-447115	Reactome Gene Sets	Interleukin-12 family signaling	3	-3.04583	-1.23463	LCP1|MSN|RAP1B
GO:0042176	GO Biological Processes	regulation of protein catabolic process	6	-2.77802	-1.02447	FLNA|MSN|OAZ1|UBB|EZR|NOP53
GO:1902117	GO Biological Processes	positive regulation of organelle assembly	3	-2.68474	-0.93833	RHOA|LCP1|MSN
GO:0002009	GO Biological Processes	morphogenesis of an epithelium	7	-2.68035	-0.936289	RHOA|FLNA|LCP1|MSN|PPP1CA|EZR|LEF1
GO:0009896	GO Biological Processes	positive regulation of catabolic process	6	-2.54623	-0.827253	ZFP36L2|MSN|OAZ1|EZR|ZFP36|NOP53
GO:0031532	GO Biological Processes	actin cytoskeleton reorganization	3	-2.3356	-0.651722	RHOA|FLNA|EZR
GO:0045732	GO Biological Processes	positive regulation of protein catabolic process	4	-2.2444	-0.571627	MSN|OAZ1|EZR|NOP53
GO:0048729	GO Biological Processes	tissue morphogenesis	7	-2.15596	-0.497873	RHOA|FLNA|LCP1|MSN|PPP1CA|EZR|LEF1
GO:0031331	GO Biological Processes	positive regulation of cellular catabolic process	5	-2.15098	-0.494818	ZFP36L2|MSN|EZR|ZFP36|NOP53
R-HSA-373760	Reactome Gene Sets	L1CAM interactions	3	-2.13839	-0.487938	ACTB|MSN|EZR
GO:1903362	GO Biological Processes	regulation of cellular protein catabolic process	4	-2.03618	-0.404257	MSN|UBB|EZR|NOP53
GO:0071407	GO Biological Processes	cellular response to organic cyclic compound	13	-7.59686	-4.19827	ACTB|RHOA|ZFP36L2|CALR|HSPA5|MSN|RAP1B|CCL5|HSP90B1|EZR|ZFP36|AKAP13|LEF1
GO:0071383	GO Biological Processes	cellular response to steroid hormone stimulus	6	-3.7365	-1.77642	RHOA|ZFP36L2|CALR|ZFP36|AKAP13|LEF1
GO:0071396	GO Biological Processes	cellular response to lipid	9	-3.73219	-1.77404	RHOA|ZFP36L2|CALR|MSN|CCL5|ZFP36|LITAF|AKAP13|LEF1
GO:0032870	GO Biological Processes	cellular response to hormone stimulus	9	-3.28157	-1.42098	RHOA|ZFP36L2|CALR|MSN|RAP1B|RGS10|ZFP36|AKAP13|LEF1
GO:0071385	GO Biological Processes	cellular response to glucocorticoid stimulus	3	-3.0238	-1.21669	ZFP36L2|ZFP36|AKAP13
GO:0071384	GO Biological Processes	cellular response to corticosteroid stimulus	3	-2.96005	-1.17024	ZFP36L2|ZFP36|AKAP13
GO:0051384	GO Biological Processes	response to glucocorticoid	4	-2.84805	-1.08356	RHOA|ZFP36L2|ZFP36|AKAP13
GO:0061061	GO Biological Processes	muscle structure development	8	-2.75768	-1.00533	RHOA|BTG1|CALR|CD53|FLT3LG|MYL6|AKAP13|LEF1
GO:0048545	GO Biological Processes	response to steroid hormone	6	-2.75515	-1.00399	RHOA|ZFP36L2|CALR|ZFP36|AKAP13|LEF1
GO:0031960	GO Biological Processes	response to corticosteroid	4	-2.68292	-0.937687	RHOA|ZFP36L2|ZFP36|AKAP13
GO:0043401	GO Biological Processes	steroid hormone mediated signaling pathway	4	-2.48353	-0.774415	RHOA|CALR|AKAP13|LEF1
R-HSA-193704	Reactome Gene Sets	p75 NTR receptor-mediated signalling	3	-2.38468	-0.690465	RHOA|UBB|AKAP13
GO:0009755	GO Biological Processes	hormone-mediated signaling pathway	4	-2.11035	-0.465546	RHOA|CALR|AKAP13|LEF1
GO:0014706	GO Biological Processes	striated muscle tissue development	5	-2.01479	-0.389166	RHOA|CALR|MYL6|AKAP13|LEF1
hsa05130	KEGG Pathway	Pathogenic Escherichia coli infection	6	-7.55629	-4.19827	ACTB|RHOA|EZR|ARPC3|ARPC2|YWHAQ
GO:0032535	GO Biological Processes	regulation of cellular component size	11	-7.41715	-4.18407	RHOA|CCR7|IL7R|MSN|PPP1CA|EZR|ARPC3|ARPC2|PPP1R15A|MYADM|TMEM123
GO:0090066	GO Biological Processes	regulation of anatomical structure size	11	-6.05182	-3.25808	RHOA|CCR7|IL7R|MSN|PPP1CA|EZR|ARPC3|ARPC2|PPP1R15A|MYADM|TMEM123
GO:0030029	GO Biological Processes	actin filament-based process	13	-5.91813	-3.13735	ACTB|RHOA|CALR|CCR7|FLNA|LCP1|MYL6|HSP90B1|EZR|ARPC3|ARPC2|AKAP13|MYADM
GO:0030036	GO Biological Processes	actin cytoskeleton organization	12	-5.71445	-2.99326	ACTB|RHOA|CALR|CCR7|FLNA|LCP1|HSP90B1|EZR|ARPC3|ARPC2|AKAP13|MYADM
GO:1900026	GO Biological Processes	positive regulation of substrate adhesion-dependent cell spreading	4	-5.16886	-2.69545	CALR|FLNA|ARPC2|MYADM
GO:0007015	GO Biological Processes	actin filament organization	9	-5.13533	-2.67432	RHOA|CCR7|FLNA|LCP1|HSP90B1|EZR|ARPC3|ARPC2|MYADM
GO:0002757	GO Biological Processes	immune response-activating signal transduction	11	-5.05663	-2.63646	ACTB|CD247|CCR7|FYB1|ITGB2|HSP90B1|UBB|EZR|ARPC3|ARPC2|NOP53
R-HSA-3928662	Reactome Gene Sets	EPHB-mediated forward signaling	4	-4.94522	-2.55322	ACTB|RHOA|ARPC3|ARPC2
R-HSA-2682334	Reactome Gene Sets	EPH-Ephrin signaling	5	-4.86072	-2.52121	ACTB|RHOA|MYL6|ARPC3|ARPC2
GO:0002764	GO Biological Processes	immune response-regulating signaling pathway	11	-4.84813	-2.52121	ACTB|CD247|CCR7|FYB1|ITGB2|HSP90B1|UBB|EZR|ARPC3|ARPC2|NOP53
GO:0032956	GO Biological Processes	regulation of actin cytoskeleton organization	8	-4.73188	-2.44492	RHOA|CCR7|FLNA|EZR|ARPC3|ARPC2|AKAP13|MYADM
R-HSA-194315	Reactome Gene Sets	Signaling by Rho GTPases	9	-4.70786	-2.43303	ACTB|RHOA|FLNA|MYL6|ARPC3|ARPC2|YWHAQ|AKAP13|ARHGAP15
GO:0034446	GO Biological Processes	substrate adhesion-dependent cell spreading	5	-4.6638	-2.40075	CALR|FLNA|ITGA4|ARPC2|MYADM
GO:0031589	GO Biological Processes	cell-substrate adhesion	8	-4.62537	-2.37757	RHOA|CALR|CCR7|FLNA|ITGA4|ITGB2|ARPC2|MYADM
GO:1900024	GO Biological Processes	regulation of substrate adhesion-dependent cell spreading	4	-4.57255	-2.34664	CALR|FLNA|ARPC2|MYADM
GO:0002253	GO Biological Processes	activation of immune response	11	-4.56886	-2.3465	ACTB|CD247|CCR7|FYB1|ITGB2|HSP90B1|UBB|EZR|ARPC3|ARPC2|NOP53
GO:0022604	GO Biological Processes	regulation of cell morphogenesis	9	-4.49776	-2.30935	RHOA|CALR|FLNA|ITGB2|MSN|EZR|ARPC2|ARHGAP15|MYADM
GO:0032970	GO Biological Processes	regulation of actin filament-based process	8	-4.35248	-2.22058	RHOA|CCR7|FLNA|EZR|ARPC3|ARPC2|AKAP13|MYADM
R-HSA-2029482	Reactome Gene Sets	Regulation of actin dynamics for phagocytic cup formation	4	-4.29734	-2.1919	ACTB|CD247|ARPC3|ARPC2
GO:0010811	GO Biological Processes	positive regulation of cell-substrate adhesion	5	-4.28658	-2.18651	CALR|CCR7|FLNA|ARPC2|MYADM
GO:0097435	GO Biological Processes	supramolecular fiber organization	10	-4.11967	-2.05992	RHOA|CCR7|FLNA|LCP1|HSP90B1|EZR|ARPC3|ARPC2|AKAP13|MYADM
GO:0010810	GO Biological Processes	regulation of cell-substrate adhesion	6	-4.09405	-2.04186	RHOA|CALR|CCR7|FLNA|ARPC2|MYADM
R-HSA-195258	Reactome Gene Sets	RHO GTPase Effectors	7	-3.97256	-1.95915	ACTB|RHOA|FLNA|MYL6|ARPC3|ARPC2|YWHAQ
hsa05100	KEGG Pathway	Bacterial invasion of epithelial cells	4	-3.92302	-1.91825	ACTB|RHOA|ARPC3|ARPC2
R-HSA-8856828	Reactome Gene Sets	Clathrin-mediated endocytosis	5	-3.90044	-1.90204	ACTB|IL7R|UBB|ARPC3|ARPC2
GO:0010770	GO Biological Processes	positive regulation of cell morphogenesis involved in differentiation	5	-3.79197	-1.8157	RHOA|CALR|FLNA|ARPC2|MYADM
GO:0043254	GO Biological Processes	regulation of protein complex assembly	8	-3.7895	-1.8157	RHOA|CCR7|LCP1|MSN|ARPC3|ARPC2|NOP53|MYADM
GO:1902903	GO Biological Processes	regulation of supramolecular fiber organization	7	-3.77525	-1.80476	RHOA|CCR7|FLNA|ARPC3|ARPC2|AKAP13|MYADM
GO:0048013	GO Biological Processes	ephrin receptor signaling pathway	4	-3.71506	-1.76407	ACTB|RHOA|ARPC3|ARPC2
R-HSA-2029480	Reactome Gene Sets	Fcgamma receptor (FCGR) dependent phagocytosis	4	-3.71506	-1.76407	ACTB|CD247|ARPC3|ARPC2
hsa05132	KEGG Pathway	Salmonella infection	4	-3.71506	-1.76407	ACTB|FLNA|ARPC3|ARPC2
GO:0030833	GO Biological Processes	regulation of actin filament polymerization	5	-3.68952	-1.74462	RHOA|CCR7|ARPC3|ARPC2|MYADM
R-HSA-5663213	Reactome Gene Sets	RHO GTPases Activate WASPs and WAVEs	3	-3.6367	-1.69999	ACTB|ARPC3|ARPC2
GO:0110053	GO Biological Processes	regulation of actin filament organization	6	-3.63568	-1.69999	RHOA|CCR7|FLNA|ARPC3|ARPC2|MYADM
GO:0031334	GO Biological Processes	positive regulation of protein complex assembly	6	-3.56534	-1.64224	RHOA|CCR7|LCP1|MSN|ARPC3|ARPC2
GO:0008064	GO Biological Processes	regulation of actin polymerization or depolymerization	5	-3.48924	-1.57838	RHOA|CCR7|ARPC3|ARPC2|MYADM
GO:0030838	GO Biological Processes	positive regulation of actin filament polymerization	4	-3.48057	-1.5724	RHOA|CCR7|ARPC3|ARPC2
GO:0030832	GO Biological Processes	regulation of actin filament length	5	-3.47812	-1.5724	RHOA|CCR7|ARPC3|ARPC2|MYADM
GO:0030041	GO Biological Processes	actin filament polymerization	5	-3.45609	-1.55207	RHOA|CCR7|ARPC3|ARPC2|MYADM
R-HSA-5653656	Reactome Gene Sets	Vesicle-mediated transport	9	-3.41838	-1.52276	ACTB|CALR|FTL|IL7R|HSP90B1|UBB|ARPC3|ARPC2|YWHAQ
GO:0051493	GO Biological Processes	regulation of cytoskeleton organization	8	-3.41025	-1.51794	RHOA|CCR7|FLNA|EZR|ARPC3|ARPC2|AKAP13|MYADM
GO:1902905	GO Biological Processes	positive regulation of supramolecular fiber organization	5	-3.23024	-1.38038	RHOA|CCR7|FLNA|ARPC3|ARPC2
GO:0008154	GO Biological Processes	actin polymerization or depolymerization	5	-3.18272	-1.34467	RHOA|CCR7|ARPC3|ARPC2|MYADM
GO:0000904	GO Biological Processes	cell morphogenesis involved in differentiation	9	-3.10201	-1.28083	ACTB|RHOA|CALR|FLNA|ITGA4|EZR|ARPC2|LEF1|MYADM
GO:0032271	GO Biological Processes	regulation of protein polymerization	5	-3.10033	-1.28083	RHOA|CCR7|ARPC3|ARPC2|MYADM
GO:0051495	GO Biological Processes	positive regulation of cytoskeleton organization	5	-3.03028	-1.22181	RHOA|CCR7|FLNA|ARPC3|ARPC2
GO:0002429	GO Biological Processes	immune response-activating cell surface receptor signaling pathway	7	-3.00889	-1.20449	ACTB|CD247|CCR7|FYB1|EZR|ARPC3|ARPC2
GO:0032273	GO Biological Processes	positive regulation of protein polymerization	4	-2.98566	-1.18641	RHOA|CCR7|ARPC3|ARPC2
GO:0010638	GO Biological Processes	positive regulation of organelle organization	8	-2.96941	-1.17698	RHOA|CCR7|FLNA|LCP1|MSN|ARPC3|ARPC2|YWHAQ
GO:0002433	GO Biological Processes	immune response-regulating cell surface receptor signaling pathway involved in phagocytosis	4	-2.92673	-1.14467	ACTB|CD247|ARPC3|ARPC2
GO:0038096	GO Biological Processes	Fc-gamma receptor signaling pathway involved in phagocytosis	4	-2.92673	-1.14467	ACTB|CD247|ARPC3|ARPC2
GO:0038094	GO Biological Processes	Fc-gamma receptor signaling pathway	4	-2.89248	-1.11551	ACTB|CD247|ARPC3|ARPC2
hsa05131	KEGG Pathway	Shigellosis	3	-2.88008	-1.10438	ACTB|ARPC3|ARPC2
GO:0002431	GO Biological Processes	Fc receptor mediated stimulatory signaling pathway	4	-2.85903	-1.09083	ACTB|CD247|ARPC3|ARPC2
GO:0006909	GO Biological Processes	phagocytosis	6	-2.84243	-1.08001	ACTB|CALR|CD247|ITGB2|ARPC3|ARPC2
GO:0002768	GO Biological Processes	immune response-regulating cell surface receptor signaling pathway	7	-2.84034	-1.07953	ACTB|CD247|CCR7|FYB1|EZR|ARPC3|ARPC2
GO:0044089	GO Biological Processes	positive regulation of cellular component biogenesis	7	-2.67584	-0.932947	RHOA|CCR7|FLNA|LCP1|MSN|ARPC3|ARPC2
GO:0051258	GO Biological Processes	protein polymerization	5	-2.59479	-0.862314	RHOA|CCR7|ARPC3|ARPC2|MYADM
GO:0010769	GO Biological Processes	regulation of cell morphogenesis involved in differentiation	5	-2.48656	-0.776355	RHOA|CALR|FLNA|ARPC2|MYADM
GO:0050852	GO Biological Processes	T cell receptor signaling pathway	4	-2.33954	-0.653615	CD247|CCR7|FYB1|EZR
R-HSA-199991	Reactome Gene Sets	Membrane Trafficking	7	-2.29724	-0.621462	ACTB|FTL|IL7R|UBB|ARPC3|ARPC2|YWHAQ
R-HSA-202403	Reactome Gene Sets	TCR signaling	3	-2.13839	-0.487938	CD247|FYB1|UBB
GO:0038093	GO Biological Processes	Fc receptor signaling pathway	4	-2.07273	-0.436242	ACTB|CD247|ARPC3|ARPC2
R-HSA-422475	Reactome Gene Sets	Axon guidance	13	-7.49465	-4.18407	ACTB|RHOA|MSN|MYL6|RPL36A|RPS2|RPS20|RPS26|RPS29|UBB|EZR|ARPC3|ARPC2
GO:0019083	GO Biological Processes	viral transcription	8	-6.88209	-3.84858	RPL36A|RPS2|RPS20|RPS26|RPS29|CCL5|ZFP36|LEF1
GO:0019080	GO Biological Processes	viral gene expression	8	-6.62857	-3.69652	RPL36A|RPS2|RPS20|RPS26|RPS29|CCL5|ZFP36|LEF1
GO:0006413	GO Biological Processes	translational initiation	8	-6.59401	-3.69298	PPP1CA|RPL36A|RPS2|RPS20|RPS26|RPS29|CCL5|PPP1R15A
GO:0070972	GO Biological Processes	protein localization to endoplasmic reticulum	7	-6.23142	-3.41052	HSPA5|RPL36A|RPS2|RPS20|RPS26|RPS29|PPP1R15A
GO:0090150	GO Biological Processes	establishment of protein localization to membrane	9	-5.7892	-3.03324	HSPA5|ITGB2|MAL|RPL36A|RPS2|RPS20|RPS26|RPS29|YWHAQ
GO:0045047	GO Biological Processes	protein targeting to ER	6	-5.57251	-2.9037	HSPA5|RPL36A|RPS2|RPS20|RPS26|RPS29
GO:0072599	GO Biological Processes	establishment of protein localization to endoplasmic reticulum	6	-5.48833	-2.8533	HSPA5|RPL36A|RPS2|RPS20|RPS26|RPS29
CORUM:338	CORUM	40S ribosomal subunit, cytoplasmic	4	-5.48432	-2.8533	RPS2|RPS20|RPS26|RPS29
GO:0006412	GO Biological Processes	translation	12	-5.40441	-2.80815	RHOA|ZFP36L2|CALR|PPP1CA|RPL36A|RPS2|RPS20|RPS26|RPS29|CCL5|ZFP36|PPP1R15A
CORUM:305	CORUM	40S ribosomal subunit, cytoplasmic	4	-5.3724	-2.8005	RPS2|RPS20|RPS26|RPS29
GO:0006612	GO Biological Processes	protein targeting to membrane	7	-5.31103	-2.77692	HSPA5|ITGB2|RPL36A|RPS2|RPS20|RPS26|RPS29
GO:0043043	GO Biological Processes	peptide biosynthetic process	12	-5.25261	-2.72568	RHOA|ZFP36L2|CALR|PPP1CA|RPL36A|RPS2|RPS20|RPS26|RPS29|CCL5|ZFP36|PPP1R15A
GO:0000956	GO Biological Processes	nuclear-transcribed mRNA catabolic process	7	-5.21396	-2.71584	ZFP36L2|RPL36A|RPS2|RPS20|RPS26|RPS29|ZFP36
CORUM:306	CORUM	Ribosome, cytoplasmic	5	-5.15809	-2.69092	RPL36A|RPS2|RPS20|RPS26|RPS29
R-HSA-376176	Reactome Gene Sets	Signaling by ROBO receptors	7	-5.09429	-2.65709	RHOA|RPL36A|RPS2|RPS20|RPS26|RPS29|UBB
R-HSA-168255	Reactome Gene Sets	Influenza Life Cycle	6	-5.07298	-2.64721	CALR|RPL36A|RPS2|RPS20|RPS26|RPS29
R-HSA-156902	Reactome Gene Sets	Peptide chain elongation	5	-4.93099	-2.55322	RPL36A|RPS2|RPS20|RPS26|RPS29
R-HSA-192823	Reactome Gene Sets	Viral mRNA Translation	5	-4.93099	-2.55322	RPL36A|RPS2|RPS20|RPS26|RPS29
R-HSA-168254	Reactome Gene Sets	Influenza Infection	6	-4.8904	-2.52789	CALR|RPL36A|RPS2|RPS20|RPS26|RPS29
GO:0006605	GO Biological Processes	protein targeting	9	-4.88591	-2.52789	HSPA5|ITGB2|RPL36A|RPS2|RPS20|RPS26|RPS29|UBB|YWHAQ
R-HSA-156842	Reactome Gene Sets	Eukaryotic Translation Elongation	5	-4.83784	-2.52121	RPL36A|RPS2|RPS20|RPS26|RPS29
R-HSA-2408557	Reactome Gene Sets	Selenocysteine synthesis	5	-4.83784	-2.52121	RPL36A|RPS2|RPS20|RPS26|RPS29
R-HSA-72764	Reactome Gene Sets	Eukaryotic Translation Termination	5	-4.83784	-2.52121	RPL36A|RPS2|RPS20|RPS26|RPS29
R-HSA-975956	Reactome Gene Sets	Nonsense Mediated Decay (NMD) independent of the Exon Junction Complex (EJC)	5	-4.79286	-2.49062	RPL36A|RPS2|RPS20|RPS26|RPS29
R-HSA-72689	Reactome Gene Sets	Formation of a pool of free 40S subunits	5	-4.6638	-2.40075	RPL36A|RPS2|RPS20|RPS26|RPS29
R-HSA-9010553	Reactome Gene Sets	Regulation of expression of SLITs and ROBOs	6	-4.64861	-2.3909	RPL36A|RPS2|RPS20|RPS26|RPS29|UBB
R-HSA-72695	Reactome Gene Sets	Formation of the ternary complex, and subsequently, the 43S complex	4	-4.60622	-2.36561	RPS2|RPS20|RPS26|RPS29
GO:0006614	GO Biological Processes	SRP-dependent cotranslational protein targeting to membrane	5	-4.58226	-2.34925	RPL36A|RPS2|RPS20|RPS26|RPS29
GO:0006402	GO Biological Processes	mRNA catabolic process	8	-4.53129	-2.32898	ZFP36L2|RPL36A|RPS2|RPS20|RPS26|RPS29|UBB|ZFP36
GO:0006613	GO Biological Processes	cotranslational protein targeting to membrane	5	-4.50399	-2.3123	RPL36A|RPS2|RPS20|RPS26|RPS29
R-HSA-156827	Reactome Gene Sets	L13a-mediated translational silencing of Ceruloplasmin expression	5	-4.46601	-2.29065	RPL36A|RPS2|RPS20|RPS26|RPS29
R-HSA-1799339	Reactome Gene Sets	SRP-dependent cotranslational protein targeting to membrane	5	-4.4473	-2.28116	RPL36A|RPS2|RPS20|RPS26|RPS29
R-HSA-72706	Reactome Gene Sets	GTP hydrolysis and joining of the 60S ribosomal subunit	5	-4.4473	-2.28116	RPL36A|RPS2|RPS20|RPS26|RPS29
R-HSA-5663205	Reactome Gene Sets	Infectious disease	8	-4.40007	-2.24617	CALR|CD247|RPL36A|RPS2|RPS20|RPS26|RPS29|UBB
R-HSA-927802	Reactome Gene Sets	Nonsense-Mediated Decay (NMD)	5	-4.39222	-2.2449	RPL36A|RPS2|RPS20|RPS26|RPS29
R-HSA-975957	Reactome Gene Sets	Nonsense Mediated Decay (NMD) enhanced by the Exon Junction Complex (EJC)	5	-4.39222	-2.2449	RPL36A|RPS2|RPS20|RPS26|RPS29
R-HSA-72649	Reactome Gene Sets	Translation initiation complex formation	4	-4.38398	-2.2449	RPS2|RPS20|RPS26|RPS29
R-HSA-72702	Reactome Gene Sets	Ribosomal scanning and start codon recognition	4	-4.38398	-2.2449	RPS2|RPS20|RPS26|RPS29
R-HSA-72662	Reactome Gene Sets	Activation of the mRNA upon binding of the cap-binding complex and eIFs, and subsequent binding to 4	4	-4.35458	-2.22058	RPS2|RPS20|RPS26|RPS29
R-HSA-2408522	Reactome Gene Sets	Selenoamino acid metabolism	5	-4.33867	-2.21393	RPL36A|RPS2|RPS20|RPS26|RPS29
R-HSA-72613	Reactome Gene Sets	Eukaryotic Translation Initiation	5	-4.32115	-2.20755	RPL36A|RPS2|RPS20|RPS26|RPS29
R-HSA-72737	Reactome Gene Sets	Cap-dependent Translation Initiation	5	-4.32115	-2.20755	RPL36A|RPS2|RPS20|RPS26|RPS29
GO:0000184	GO Biological Processes	nuclear-transcribed mRNA catabolic process, nonsense-mediated decay	5	-4.30379	-2.19565	RPL36A|RPS2|RPS20|RPS26|RPS29
GO:0006401	GO Biological Processes	RNA catabolic process	8	-4.26741	-2.17786	ZFP36L2|RPL36A|RPS2|RPS20|RPS26|RPS29|UBB|ZFP36
GO:0072594	GO Biological Processes	establishment of protein localization to organelle	9	-4.07642	-2.03555	FLNA|HSPA5|RPL36A|RPS2|RPS20|RPS26|RPS29|UBB|YWHAQ
R-HSA-168273	Reactome Gene Sets	Influenza Viral RNA Transcription and Replication	5	-4.07597	-2.03555	RPL36A|RPS2|RPS20|RPS26|RPS29
hsa03010	KEGG Pathway	Ribosome	5	-3.80519	-1.81926	RPL36A|RPS2|RPS20|RPS26|RPS29
R-HSA-71291	Reactome Gene Sets	Metabolism of amino acids and derivatives	7	-3.62876	-1.6949	OAZ1|RPL36A|RPS2|RPS20|RPS26|RPS29|SAT1
R-HSA-6791226	Reactome Gene Sets	Major pathway of rRNA processing in the nucleolus and cytosol	5	-3.42355	-1.52626	RPL36A|RPS2|RPS20|RPS26|RPS29
R-HSA-8868773	Reactome Gene Sets	rRNA processing in the nucleus and cytosol	5	-3.31917	-1.44307	RPL36A|RPS2|RPS20|RPS26|RPS29
R-HSA-72312	Reactome Gene Sets	rRNA processing	5	-3.22063	-1.37226	RPL36A|RPS2|RPS20|RPS26|RPS29
GO:0034655	GO Biological Processes	nucleobase-containing compound catabolic process	8	-2.84829	-1.08356	ZFP36L2|RPL36A|RPS2|RPS20|RPS26|RPS29|UBB|ZFP36
GO:0046700	GO Biological Processes	heterocycle catabolic process	8	-2.6363	-0.89923	ZFP36L2|RPL36A|RPS2|RPS20|RPS26|RPS29|UBB|ZFP36
GO:0044270	GO Biological Processes	cellular nitrogen compound catabolic process	8	-2.63251	-0.897735	ZFP36L2|RPL36A|RPS2|RPS20|RPS26|RPS29|UBB|ZFP36
GO:0019439	GO Biological Processes	aromatic compound catabolic process	8	-2.59117	-0.861575	ZFP36L2|RPL36A|RPS2|RPS20|RPS26|RPS29|UBB|ZFP36
R-HSA-72766	Reactome Gene Sets	Translation	5	-2.54932	-0.829237	RPL36A|RPS2|RPS20|RPS26|RPS29
GO:1901361	GO Biological Processes	organic cyclic compound catabolic process	8	-2.45457	-0.7519	ZFP36L2|RPL36A|RPS2|RPS20|RPS26|RPS29|UBB|ZFP36
GO:0002181	GO Biological Processes	cytoplasmic translation	3	-2.34766	-0.660715	RPL36A|RPS26|RPS29
CORUM:3055	CORUM	Nop56p-associated pre-rRNA complex	3	-2.30016	-0.623381	RPL36A|RPS2|RPS29
R-HSA-8953854	Reactome Gene Sets	Metabolism of RNA	7	-2.15257	-0.495446	RPL36A|RPS2|RPS20|RPS26|RPS29|UBB|ZFP36
R-HSA-109582	Reactome Gene Sets	Hemostasis	13	-6.91034	-3.84858	ACTB|RHOA|CD74|FLNA|HSPA5|ITGA4|ITGB2|CD99|SRGN|PSAP|RAP1B|SELL|TAGLN2
R-HSA-76002	Reactome Gene Sets	Platelet activation, signaling and aggregation	7	-4.57873	-2.34925	RHOA|FLNA|HSPA5|SRGN|PSAP|RAP1B|TAGLN2
R-HSA-114608	Reactome Gene Sets	Platelet degranulation	5	-4.15424	-2.08501	FLNA|HSPA5|SRGN|PSAP|TAGLN2
R-HSA-76005	Reactome Gene Sets	Response to elevated platelet cytosolic Ca2+	5	-4.07597	-2.03555	FLNA|HSPA5|SRGN|PSAP|TAGLN2
GO:0002576	GO Biological Processes	platelet degranulation	4	-3.05966	-1.24709	FLNA|SRGN|PSAP|TAGLN2
GO:0007188	GO Biological Processes	adenylate cyclase-modulating G protein-coupled receptor signaling pathway	4	-2.19589	-0.530034	ADGRE5|FLNA|PSAP|AKAP13
R-HSA-1280218	Reactome Gene Sets	Adaptive Immune System	14	-6.75281	-3.76277	CALR|CD247|CD74|FYB1|PDIA3|HSPA5|ITGA4|ITGB2|KLRB1|CD99|RAP1B|SELL|UBB|HCST
hsa04650	KEGG Pathway	Natural killer cell mediated cytotoxicity	3	-2.00662	-0.383571	CD247|ITGB2|HCST
GO:0002274	GO Biological Processes	myeloid leukocyte activation	13	-6.66034	-3.69652	RHOA|CAMK4|CD53|CD74|ADGRE5|FLT3LG|FTL|ITGB2|PSAP|RAP1B|CCL5|SELL|YPEL5
GO:0042119	GO Biological Processes	neutrophil activation	10	-5.23351	-2.71887	RHOA|CD53|ADGRE5|FTL|ITGB2|PSAP|RAP1B|CCL5|SELL|YPEL5
GO:0036230	GO Biological Processes	granulocyte activation	10	-5.19559	-2.71584	RHOA|CD53|ADGRE5|FTL|ITGB2|PSAP|RAP1B|CCL5|SELL|YPEL5
GO:0045055	GO Biological Processes	regulated exocytosis	12	-4.93943	-2.55322	RHOA|CD53|ADGRE5|FLNA|FTL|ITGB2|SRGN|PSAP|RAP1B|SELL|TAGLN2|YPEL5
GO:0002444	GO Biological Processes	myeloid leukocyte mediated immunity	10	-4.83895	-2.52121	RHOA|CAMK4|CD53|ADGRE5|FTL|ITGB2|PSAP|RAP1B|SELL|YPEL5
GO:0002366	GO Biological Processes	leukocyte activation involved in immune response	11	-4.66872	-2.40075	RHOA|CD53|ADGRE5|FTL|ITGB2|LCP1|PSAP|RAP1B|SELL|LEF1|YPEL5
GO:0002263	GO Biological Processes	cell activation involved in immune response	11	-4.64626	-2.3909	RHOA|CD53|ADGRE5|FTL|ITGB2|LCP1|PSAP|RAP1B|SELL|LEF1|YPEL5
R-HSA-6798695	Reactome Gene Sets	Neutrophil degranulation	9	-4.52585	-2.32753	RHOA|CD53|ADGRE5|FTL|ITGB2|PSAP|RAP1B|SELL|YPEL5
GO:0043312	GO Biological Processes	neutrophil degranulation	9	-4.48382	-2.30189	RHOA|CD53|ADGRE5|FTL|ITGB2|PSAP|RAP1B|SELL|YPEL5
GO:0002283	GO Biological Processes	neutrophil activation involved in immune response	9	-4.46303	-2.29065	RHOA|CD53|ADGRE5|FTL|ITGB2|PSAP|RAP1B|SELL|YPEL5
GO:0002446	GO Biological Processes	neutrophil mediated immunity	9	-4.38807	-2.2449	RHOA|CD53|ADGRE5|FTL|ITGB2|PSAP|RAP1B|SELL|YPEL5
GO:0043299	GO Biological Processes	leukocyte degranulation	9	-4.15577	-2.08501	RHOA|CD53|ADGRE5|FTL|ITGB2|PSAP|RAP1B|SELL|YPEL5
GO:0002275	GO Biological Processes	myeloid cell activation involved in immune response	9	-4.09453	-2.04186	RHOA|CD53|ADGRE5|FTL|ITGB2|PSAP|RAP1B|SELL|YPEL5
GO:0002687	GO Biological Processes	positive regulation of leukocyte migration	7	-6.63985	-3.69652	RHOA|CALR|CD74|CCR7|ITGA4|CD99|CCL5
GO:0002685	GO Biological Processes	regulation of leukocyte migration	8	-6.52604	-3.66093	RHOA|CALR|CD74|CCR7|ITGA4|CD99|MSN|CCL5
GO:0030335	GO Biological Processes	positive regulation of cell migration	11	-5.75461	-3.01055	RHOA|CALR|CD74|CCR7|FLNA|HSPA5|ITGA4|CD99|CCL5|LEF1|MYADM
GO:0043123	GO Biological Processes	positive regulation of I-kappaB kinase/NF-kappaB signaling	7	-5.5943	-2.90529	RHOA|CD74|CCR7|FLNA|LITAF|AKAP13|NDFIP1
GO:2000147	GO Biological Processes	positive regulation of cell motility	11	-5.57409	-2.9037	RHOA|CALR|CD74|CCR7|FLNA|HSPA5|ITGA4|CD99|CCL5|LEF1|MYADM
GO:0007249	GO Biological Processes	I-kappaB kinase/NF-kappaB signaling	8	-5.50988	-2.86037	RHOA|CD74|CCR7|FLNA|UBB|LITAF|AKAP13|NDFIP1
GO:0051272	GO Biological Processes	positive regulation of cellular component movement	11	-5.45153	-2.84021	RHOA|CALR|CD74|CCR7|FLNA|HSPA5|ITGA4|CD99|CCL5|LEF1|MYADM
GO:0040017	GO Biological Processes	positive regulation of locomotion	11	-5.36059	-2.79652	RHOA|CALR|CD74|CCR7|FLNA|HSPA5|ITGA4|CD99|CCL5|LEF1|MYADM
GO:0050900	GO Biological Processes	leukocyte migration	10	-5.21829	-2.71584	RHOA|CALR|CD74|CCR7|ITGA4|ITGB2|CD99|MSN|CCL5|SELL
GO:0043122	GO Biological Processes	regulation of I-kappaB kinase/NF-kappaB signaling	7	-4.85864	-2.52121	RHOA|CD74|CCR7|FLNA|LITAF|AKAP13|NDFIP1
GO:1990266	GO Biological Processes	neutrophil migration	5	-4.32115	-2.20755	CD74|CCR7|ITGB2|CD99|CCL5
GO:0002407	GO Biological Processes	dendritic cell chemotaxis	3	-4.17175	-2.09753	CALR|CCR7|CCL5
GO:0036336	GO Biological Processes	dendritic cell migration	3	-4.01495	-1.99232	CALR|CCR7|CCL5
GO:0097530	GO Biological Processes	granulocyte migration	5	-3.95714	-1.94808	CD74|CCR7|ITGB2|CD99|CCL5
GO:1902624	GO Biological Processes	positive regulation of neutrophil migration	3	-3.92038	-1.91774	CD74|CCR7|CD99
GO:0002690	GO Biological Processes	positive regulation of leukocyte chemotaxis	4	-3.6957	-1.74893	CALR|CD74|CCR7|CCL5
GO:1902622	GO Biological Processes	regulation of neutrophil migration	3	-3.60101	-1.67076	CD74|CCR7|CD99
GO:0030593	GO Biological Processes	neutrophil chemotaxis	4	-3.39911	-1.50845	CD74|CCR7|ITGB2|CCL5
GO:0071622	GO Biological Processes	regulation of granulocyte chemotaxis	3	-3.37665	-1.49414	CD74|CCR7|CCL5
GO:0043410	GO Biological Processes	positive regulation of MAPK cascade	8	-3.33587	-1.45818	CD27|CD74|CCR7|PSAP|RAP1B|CCL5|UBB|AKAP13
GO:0045058	GO Biological Processes	T cell selection	3	-3.29186	-1.42536	RHOA|CD74|CCR7
GO:0060326	GO Biological Processes	cell chemotaxis	6	-3.276	-1.41706	CALR|CD74|CCR7|ITGB2|CCL5|LEF1
GO:0002688	GO Biological Processes	regulation of leukocyte chemotaxis	4	-3.24824	-1.39386	CALR|CD74|CCR7|CCL5
GO:0097529	GO Biological Processes	myeloid leukocyte migration	5	-3.15482	-1.32112	CD74|CCR7|ITGB2|CD99|CCL5
GO:0070371	GO Biological Processes	ERK1 and ERK2 cascade	6	-3.15279	-1.32054	ZFP36L2|CD74|CCR7|RAP1B|CCL5|EZR
GO:0071621	GO Biological Processes	granulocyte chemotaxis	4	-3.1243	-1.29776	CD74|CCR7|ITGB2|CCL5
GO:0030595	GO Biological Processes	leukocyte chemotaxis	5	-3.03888	-1.22904	CALR|CD74|CCR7|ITGB2|CCL5
GO:0043408	GO Biological Processes	regulation of MAPK cascade	9	-2.98546	-1.18641	CD27|CD74|CCR7|PSAP|RAP1B|CCL5|UBB|EZR|AKAP13
GO:0050921	GO Biological Processes	positive regulation of chemotaxis	4	-2.97368	-1.17993	CALR|CD74|CCR7|CCL5
GO:0006935	GO Biological Processes	chemotaxis	8	-2.87794	-1.1035	RHOA|CALR|CD74|CCR7|ITGB2|CCL5|EZR|LEF1
GO:0042330	GO Biological Processes	taxis	8	-2.86943	-1.09749	RHOA|CALR|CD74|CCR7|ITGB2|CCL5|EZR|LEF1
GO:0070372	GO Biological Processes	regulation of ERK1 and ERK2 cascade	5	-2.46821	-0.7634	CD74|CCR7|RAP1B|CCL5|EZR
GO:0051347	GO Biological Processes	positive regulation of transferase activity	7	-2.23579	-0.564011	RHOA|CD74|CCR7|RPS2|CCL5|UBB|AKAP13
GO:0050920	GO Biological Processes	regulation of chemotaxis	4	-2.23036	-0.561548	CALR|CD74|CCR7|CCL5
GO:0070374	GO Biological Processes	positive regulation of ERK1 and ERK2 cascade	4	-2.23036	-0.561548	CD74|CCR7|RAP1B|CCL5
GO:0045860	GO Biological Processes	positive regulation of protein kinase activity	6	-2.06598	-0.430408	RHOA|CD74|CCR7|CCL5|UBB|AKAP13
GO:0034975	GO Biological Processes	protein folding in endoplasmic reticulum	4	-6.59027	-3.69298	CALR|PDIA3|HSPA5|HSP90B1
GO:0036500	GO Biological Processes	ATF6-mediated unfolded protein response	3	-5.38425	-2.80438	CALR|HSPA5|HSP90B1
R-HSA-381183	Reactome Gene Sets	ATF6 (ATF6-alpha) activates chaperone genes	3	-5.38425	-2.80438	CALR|HSPA5|HSP90B1
R-HSA-381033	Reactome Gene Sets	ATF6 (ATF6-alpha) activates chaperones	3	-5.12309	-2.67415	CALR|HSPA5|HSP90B1
GO:0006984	GO Biological Processes	ER-nucleus signaling pathway	4	-4.78585	-2.49062	CALR|HSPA5|HSP90B1|PPP1R15A
R-HSA-3000480	Reactome Gene Sets	Scavenging by Class A Receptors	3	-4.48645	-2.30189	CALR|FTL|HSP90B1
R-HSA-983170	Reactome Gene Sets	Antigen Presentation: Folding, assembly and peptide loading of class I MHC	3	-4.11727	-2.05992	CALR|PDIA3|HSPA5
R-HSA-901042	Reactome Gene Sets	Calnexin/calreticulin cycle	3	-4.06506	-2.02926	CALR|PDIA3|UBB
GO:0006457	GO Biological Processes	protein folding	6	-3.9437	-1.93679	CALR|CD74|PDIA3|HSPA5|PPIB|HSP90B1
hsa04612	KEGG Pathway	Antigen processing and presentation	4	-3.90094	-1.90204	CALR|CD74|PDIA3|HSPA5
R-HSA-532668	Reactome Gene Sets	N-glycan trimming in the ER and Calnexin/Calreticulin cycle	3	-3.67345	-1.7304	CALR|PDIA3|UBB
hsa04141	KEGG Pathway	Protein processing in endoplasmic reticulum	5	-3.64037	-1.69999	CALR|PDIA3|HSPA5|HSP90B1|PPP1R15A
R-HSA-2173782	Reactome Gene Sets	Binding and Uptake of Ligands by Scavenger Receptors	3	-3.43666	-1.53602	CALR|FTL|HSP90B1
GO:0030968	GO Biological Processes	endoplasmic reticulum unfolded protein response	4	-3.15097	-1.32015	CALR|HSPA5|HSP90B1|PPP1R15A
GO:0034620	GO Biological Processes	cellular response to unfolded protein	4	-2.91522	-1.13572	CALR|HSPA5|HSP90B1|PPP1R15A
GO:0035967	GO Biological Processes	cellular response to topologically incorrect protein	4	-2.6927	-0.945103	CALR|HSPA5|HSP90B1|PPP1R15A
GO:0034976	GO Biological Processes	response to endoplasmic reticulum stress	5	-2.58822	-0.860286	CALR|PDIA3|HSPA5|HSP90B1|PPP1R15A
R-HSA-1236974	Reactome Gene Sets	ER-Phagosome pathway	3	-2.57568	-0.848877	CALR|PDIA3|UBB
GO:0006986	GO Biological Processes	response to unfolded protein	4	-2.55277	-0.829336	CALR|HSPA5|HSP90B1|PPP1R15A
R-HSA-381119	Reactome Gene Sets	Unfolded Protein Response (UPR)	3	-2.43602	-0.735486	CALR|HSPA5|HSP90B1
GO:0035966	GO Biological Processes	response to topologically incorrect protein	4	-2.36249	-0.672407	CALR|HSPA5|HSP90B1|PPP1R15A
R-HSA-1236975	Reactome Gene Sets	Antigen processing-Cross presentation	3	-2.35987	-0.670853	CALR|PDIA3|UBB
GO:0019882	GO Biological Processes	antigen processing and presentation	4	-2.16232	-0.502302	CALR|CD74|CCR7|PDIA3
GO:0051208	GO Biological Processes	sequestering of calcium ion	3	-2.02447	-0.396818	CALR|CCR7|HSP90B1
R-HSA-198933	Reactome Gene Sets	Immunoregulatory interactions between a Lymphoid and a non-Lymphoid cell	7	-6.54866	-3.66776	CD247|ITGA4|ITGB2|KLRB1|CD99|SELL|HCST
GO:0061756	GO Biological Processes	leukocyte adhesion to vascular endothelial cell	4	-4.8636	-2.52121	RHOA|ITGA4|ITGB2|SELL
GO:1904996	GO Biological Processes	positive regulation of leukocyte adhesion to vascular endothelial cell	3	-4.63819	-2.38663	RHOA|ITGA4|ITGB2
GO:0045123	GO Biological Processes	cellular extravasation	4	-4.26947	-2.17786	ITGA4|ITGB2|CD99|SELL
R-HSA-202733	Reactome Gene Sets	Cell surface interactions at the vascular wall	5	-4.01562	-1.99232	CD74|ITGA4|ITGB2|CD99|SELL
GO:1904994	GO Biological Processes	regulation of leukocyte adhesion to vascular endothelial cell	3	-3.96676	-1.95553	RHOA|ITGA4|ITGB2
GO:0007229	GO Biological Processes	integrin-mediated signaling pathway	4	-3.38333	-1.49758	FLNA|FYB1|ITGA4|ITGB2
GO:0043113	GO Biological Processes	receptor clustering	3	-3.09116	-1.27305	FLNA|ITGA4|ITGB2
GO:0034113	GO Biological Processes	heterotypic cell-cell adhesion	3	-2.93955	-1.15491	ITGA4|ITGB2|MYADM
hsa04514	KEGG Pathway	Cell adhesion molecules (CAMs)	4	-2.87009	-1.09749	ITGA4|ITGB2|CD99|SELL
GO:0051668	GO Biological Processes	localization within membrane	4	-2.82633	-1.06795	FLNA|ITGA4|ITGB2|MAL
GO:0033627	GO Biological Processes	cell adhesion mediated by integrin	3	-2.82348	-1.06752	ITGA4|ITGB2|CCL5
hsa05152	KEGG Pathway	Tuberculosis	4	-2.52639	-0.809628	RHOA|CD74|ITGB2|LSP1
hsa05323	KEGG Pathway	Rheumatoid arthritis	3	-2.47614	-0.769238	ITGB2|LTB|CCL5
GO:0007369	GO Biological Processes	gastrulation	4	-2.47512	-0.769238	ITGA4|ITGB2|LEF1|MYADM
GO:0007160	GO Biological Processes	cell-matrix adhesion	4	-2.16896	-0.507008	RHOA|CCR7|ITGA4|ITGB2
GO:0001704	GO Biological Processes	formation of primary germ layer	3	-2.11854	-0.471854	ITGA4|ITGB2|LEF1
GO:0019221	GO Biological Processes	cytokine-mediated signaling pathway	14	-6.48276	-3.6329	CD27|CD74|CCR7|KLF6|FLT3LG|IL7R|ITGB2|LCP1|LTB|MSN|RAP1B|CCL5|HSP90B1|UBB
R-HSA-449147	Reactome Gene Sets	Signaling by Interleukins	10	-4.34102	-2.21393	ACTB|FLT3LG|IL7R|ITGB2|LCP1|MSN|RAP1B|CCL5|HSP90B1|UBB
R-HSA-5673001	Reactome Gene Sets	RAF/MAP kinase cascade	4	-2.02424	-0.396818	ACTB|FLT3LG|RAP1B|UBB
GO:0072676	GO Biological Processes	lymphocyte migration	6	-5.72748	-2.995	RHOA|CCR7|ITGA4|CD99|MSN|CCL5
GO:0072678	GO Biological Processes	T cell migration	5	-5.60521	-2.90529	RHOA|ITGA4|CD99|MSN|CCL5
GO:2000401	GO Biological Processes	regulation of lymphocyte migration	4	-4.24207	-2.15512	RHOA|ITGA4|MSN|CCL5
GO:2000406	GO Biological Processes	positive regulation of T cell migration	3	-3.83249	-1.84064	RHOA|ITGA4|CCL5
GO:2000403	GO Biological Processes	positive regulation of lymphocyte migration	3	-3.60101	-1.67076	RHOA|ITGA4|CCL5
GO:2000404	GO Biological Processes	regulation of T cell migration	3	-3.37665	-1.49414	RHOA|ITGA4|CCL5
GO:0071216	GO Biological Processes	cellular response to biotic stimulus	5	-2.94658	-1.15936	RHOA|HSPA5|CCL5|ZFP36|LITAF
GO:0071363	GO Biological Processes	cellular response to growth factor stimulus	8	-2.62115	-0.887526	RHOA|ZFP36L2|HSPA5|CCL5|UBB|ZFP36|ARPC3|LEF1
GO:0070848	GO Biological Processes	response to growth factor	8	-2.51095	-0.796384	RHOA|ZFP36L2|HSPA5|CCL5|UBB|ZFP36|ARPC3|LEF1
hsa04062	KEGG Pathway	Chemokine signaling pathway	4	-2.50052	-0.788137	RHOA|CCR7|RAP1B|CCL5
GO:1990868	GO Biological Processes	response to chemokine	3	-2.38468	-0.690465	RHOA|CCR7|CCL5
GO:1990869	GO Biological Processes	cellular response to chemokine	3	-2.38468	-0.690465	RHOA|CCR7|CCL5
GO:0032496	GO Biological Processes	response to lipopolysaccharide	5	-2.3177	-0.639184	RHOA|CCR7|CCL5|ZFP36|LITAF
GO:0071222	GO Biological Processes	cellular response to lipopolysaccharide	4	-2.31697	-0.639184	RHOA|CCL5|ZFP36|LITAF
GO:0071219	GO Biological Processes	cellular response to molecule of bacterial origin	4	-2.26576	-0.590984	RHOA|CCL5|ZFP36|LITAF
GO:0002237	GO Biological Processes	response to molecule of bacterial origin	5	-2.2477	-0.573925	RHOA|CCR7|CCL5|ZFP36|LITAF
GO:0070997	GO Biological Processes	neuron death	5	-2.22162	-0.553801	RHOA|HSPA5|ITGB2|CCL5|UBB
GO:0071560	GO Biological Processes	cellular response to transforming growth factor beta stimulus	4	-2.00652	-0.383571	RHOA|ZFP36L2|HSPA5|UBB
GO:1903827	GO Biological Processes	regulation of cellular protein localization	10	-5.04816	-2.63352	ACTB|CD247|FLNA|ITGB2|LCP1|MSN|OAZ1|EZR|YWHAQ|LEPROTL1
GO:1903829	GO Biological Processes	positive regulation of cellular protein localization	7	-3.9974	-1.9796	CD247|FLNA|ITGB2|MSN|OAZ1|EZR|YWHAQ
GO:0090087	GO Biological Processes	regulation of peptide transport	10	-3.83069	-1.84064	CD74|CCR7|FLNA|ITGB2|LCP1|OAZ1|SRGN|CCL5|EZR|NDFIP1
GO:0070201	GO Biological Processes	regulation of establishment of protein localization	10	-3.74988	-1.78787	CCR7|FLNA|ITGB2|LCP1|OAZ1|SRGN|CCL5|EZR|YWHAQ|NDFIP1
GO:0051223	GO Biological Processes	regulation of protein transport	9	-3.29046	-1.42536	CCR7|FLNA|ITGB2|LCP1|OAZ1|SRGN|CCL5|EZR|NDFIP1
GO:0032386	GO Biological Processes	regulation of intracellular transport	7	-3.28146	-1.42098	FLNA|ITGB2|LCP1|MSN|OAZ1|RAP1B|EZR
GO:0032388	GO Biological Processes	positive regulation of intracellular transport	5	-3.12736	-1.29797	FLNA|ITGB2|MSN|OAZ1|EZR
GO:1905475	GO Biological Processes	regulation of protein localization to membrane	4	-2.45844	-0.754709	ACTB|ITGB2|EZR|YWHAQ
GO:0006898	GO Biological Processes	receptor-mediated endocytosis	5	-2.36245	-0.672407	CALR|ITGA4|ITGB2|HSP90B1|EZR
GO:0033157	GO Biological Processes	regulation of intracellular protein transport	4	-2.17564	-0.512716	FLNA|ITGB2|LCP1|OAZ1
GO:1905477	GO Biological Processes	positive regulation of protein localization to membrane	3	-2.10875	-0.46487	ITGB2|EZR|YWHAQ
GO:0044106	GO Biological Processes	cellular amine metabolic process	3	-2.03351	-0.403394	ITGB2|OAZ1|SAT1
hsa04390	KEGG Pathway	Hippo signaling pathway	6	-4.90641	-2.53612	ACTB|ITGB2|PPP1CA|TCF7|YWHAQ|LEF1
GO:0032091	GO Biological Processes	negative regulation of protein binding	5	-4.60232	-2.36561	ACTB|HSPA5|ITGA4|PPP1CA|LEF1
hsa04520	KEGG Pathway	Adherens junction	4	-4.01455	-1.99232	ACTB|RHOA|TCF7|LEF1
hsa05412	KEGG Pathway	Arrhythmogenic right ventricular cardiomyopathy (ARVC)	4	-4.01455	-1.99232	ACTB|ITGA4|TCF7|LEF1
GO:0071353	GO Biological Processes	cellular response to interleukin-4	3	-3.79077	-1.8157	HSPA5|TCF7|LEF1
GO:0070670	GO Biological Processes	response to interleukin-4	3	-3.71133	-1.76268	HSPA5|TCF7|LEF1
GO:0051100	GO Biological Processes	negative regulation of binding	5	-3.59251	-1.66586	ACTB|HSPA5|ITGA4|PPP1CA|LEF1
R-HSA-8878159	Reactome Gene Sets	Transcriptional regulation by RUNX3	4	-3.5316	-1.61379	ITGA4|TCF7|UBB|LEF1
R-HSA-3769402	Reactome Gene Sets	Deactivation of the beta-catenin transactivating complex	3	-3.43666	-1.53602	TCF7|UBB|LEF1
GO:0043393	GO Biological Processes	regulation of protein binding	5	-3.10033	-1.28083	ACTB|HSPA5|ITGA4|PPP1CA|LEF1
hsa05210	KEGG Pathway	Colorectal cancer	3	-2.98092	-1.18454	RHOA|TCF7|LEF1
R-HSA-3858494	Reactome Gene Sets	Beta-catenin independent WNT signaling	4	-2.85903	-1.09083	RHOA|TCF7|UBB|LEF1
GO:0021872	GO Biological Processes	forebrain generation of neurons	3	-2.82348	-1.06752	RHOA|UBB|LEF1
R-HSA-195253	Reactome Gene Sets	Degradation of beta-catenin by the destruction complex	3	-2.59064	-0.861575	TCF7|UBB|LEF1
hsa05215	KEGG Pathway	Prostate cancer	3	-2.51773	-0.802068	TCF7|HSP90B1|LEF1
GO:0048608	GO Biological Processes	reproductive structure development	6	-2.50627	-0.792798	FLNA|HSPA5|PSAP|TCF7|UBB|LEF1
GO:0061458	GO Biological Processes	reproductive system development	6	-2.49152	-0.78023	FLNA|HSPA5|PSAP|TCF7|UBB|LEF1
GO:0046632	GO Biological Processes	alpha-beta T cell differentiation	3	-2.3356	-0.651722	RHOA|TCF7|LEF1
GO:0051098	GO Biological Processes	regulation of binding	5	-2.09305	-0.452882	ACTB|HSPA5|ITGA4|PPP1CA|LEF1
GO:0021762	GO Biological Processes	substantia nigra development	4	-4.9039	-2.53612	ACTB|RHOA|HSPA5|YWHAQ
hsa04510	KEGG Pathway	Focal adhesion	6	-4.27985	-2.18243	ACTB|RHOA|FLNA|ITGA4|PPP1CA|RAP1B
GO:0048857	GO Biological Processes	neural nucleus development	4	-4.26947	-2.17786	ACTB|RHOA|HSPA5|YWHAQ
hsa04921	KEGG Pathway	Oxytocin signaling pathway	5	-3.8185	-1.83052	ACTB|RHOA|CAMK4|MYL6|PPP1CA
GO:0030901	GO Biological Processes	midbrain development	4	-3.63905	-1.69999	ACTB|RHOA|HSPA5|YWHAQ
hsa04015	KEGG Pathway	Rap1 signaling pathway	5	-3.17337	-1.33678	ACTB|RHOA|FYB1|ITGB2|RAP1B
hsa04611	KEGG Pathway	Platelet activation	4	-3.1243	-1.29776	ACTB|RHOA|PPP1CA|RAP1B
hsa04720	KEGG Pathway	Long-term potentiation	3	-2.84204	-1.08001	CAMK4|PPP1CA|RAP1B
GO:0034330	GO Biological Processes	cell junction organization	5	-2.54932	-0.829237	ACTB|RHOA|FLNA|RAP1B|MYADM
R-HSA-5625740	Reactome Gene Sets	RHO GTPases activate PKNs	3	-2.41006	-0.712692	RHOA|MYL6|YWHAQ
hsa04024	KEGG Pathway	cAMP signaling pathway	4	-2.37023	-0.678107	RHOA|CAMK4|PPP1CA|RAP1B
hsa04722	KEGG Pathway	Neurotrophin signaling pathway	3	-2.13839	-0.487938	RHOA|CAMK4|RAP1B
hsa04270	KEGG Pathway	Vascular smooth muscle contraction	3	-2.11854	-0.471854	RHOA|MYL6|PPP1CA
GO:0034329	GO Biological Processes	cell junction assembly	4	-2.07273	-0.436242	ACTB|RHOA|FLNA|RAP1B
GO:0051235	GO Biological Processes	maintenance of location	8	-4.86162	-2.52121	CALR|CCR7|FLNA|FTL|HSPA5|SRGN|HSP90B1|EZR
GO:0051651	GO Biological Processes	maintenance of location in cell	4	-3.549	-1.62943	FTL|HSPA5|SRGN|EZR
GO:0045185	GO Biological Processes	maintenance of protein location	4	-3.38333	-1.49758	FLNA|HSPA5|SRGN|EZR
GO:0071320	GO Biological Processes	cellular response to cAMP	3	-3.11449	-1.28936	HSPA5|RAP1B|EZR
GO:0046683	GO Biological Processes	response to organophosphorus	4	-2.97368	-1.17993	HSPA5|RAP1B|HSP90B1|EZR
GO:0035690	GO Biological Processes	cellular response to drug	6	-2.8484	-1.08356	ACTB|HSPA5|PSAP|RAP1B|RGS10|HSP90B1
GO:0014074	GO Biological Processes	response to purine-containing compound	4	-2.80494	-1.05018	HSPA5|RAP1B|HSP90B1|EZR
GO:0051051	GO Biological Processes	negative regulation of transport	7	-2.74	-0.991216	CD74|OAZ1|SRGN|RAP1B|EZR|YWHAQ|NDFIP1
GO:0051591	GO Biological Processes	response to cAMP	3	-2.3722	-0.679035	HSPA5|RAP1B|EZR
GO:1901699	GO Biological Processes	cellular response to nitrogen compound	7	-2.23224	-0.561548	ACTB|HSPA5|ITGA4|RAP1B|RGS10|HSP90B1|EZR
GO:0051048	GO Biological Processes	negative regulation of secretion	4	-2.07892	-0.4406	CD74|SRGN|RAP1B|EZR
hsa04640	KEGG Pathway	Hematopoietic cell lineage	5	-4.74889	-2.45782	CD5|CD37|FLT3LG|IL7R|ITGA4
GO:0010942	GO Biological Processes	positive regulation of cell death	11	-4.5525	-2.33715	RHOA|BTG1|PDIA3|ITGA4|ITGB2|MAL|PPP1CA|CCL5|UBB|YWHAQ|AKAP13
GO:0097190	GO Biological Processes	apoptotic signaling pathway	10	-4.53065	-2.32898	CD5|CD27|CD74|PDIA3|MAL|PPP1CA|SRGN|UBB|YWHAQ|PPP1R15A
GO:0043065	GO Biological Processes	positive regulation of apoptotic process	10	-4.13036	-2.06361	RHOA|BTG1|PDIA3|ITGA4|MAL|PPP1CA|CCL5|UBB|YWHAQ|AKAP13
GO:0043068	GO Biological Processes	positive regulation of programmed cell death	10	-4.08786	-2.0394	RHOA|BTG1|PDIA3|ITGA4|MAL|PPP1CA|CCL5|UBB|YWHAQ|AKAP13
GO:2001235	GO Biological Processes	positive regulation of apoptotic signaling pathway	5	-3.48924	-1.57838	PDIA3|MAL|PPP1CA|UBB|YWHAQ
GO:2001238	GO Biological Processes	positive regulation of extrinsic apoptotic signaling pathway	3	-3.23846	-1.38709	PDIA3|MAL|PPP1CA
GO:2001233	GO Biological Processes	regulation of apoptotic signaling pathway	6	-2.63962	-0.900227	CD74|PDIA3|MAL|PPP1CA|UBB|YWHAQ
GO:0097191	GO Biological Processes	extrinsic apoptotic signaling pathway	4	-2.18236	-0.518455	CD27|PDIA3|MAL|PPP1CA
GO:0048015	GO Biological Processes	phosphatidylinositol-mediated signaling	6	-4.50974	-2.31475	RHOA|CCL5|EZR|HCST|NOP53|PIK3IP1
GO:0048017	GO Biological Processes	inositol lipid-mediated signaling	6	-4.46972	-2.291	RHOA|CCL5|EZR|HCST|NOP53|PIK3IP1
GO:0014066	GO Biological Processes	regulation of phosphatidylinositol 3-kinase signaling	4	-3.11115	-1.28744	CCL5|HCST|NOP53|PIK3IP1
GO:0014065	GO Biological Processes	phosphatidylinositol 3-kinase signaling	4	-2.82633	-1.06795	CCL5|HCST|NOP53|PIK3IP1
GO:1902532	GO Biological Processes	negative regulation of intracellular signal transduction	7	-2.56205	-0.8375	RHOA|CD74|EZR|LITAF|NOP53|MYADM|PIK3IP1
GO:1901222	GO Biological Processes	regulation of NIK/NF-kappaB signaling	5	-4.30379	-2.19565	RHOA|CALR|CD27|EZR|LITAF
GO:0038061	GO Biological Processes	NIK/NF-kappaB signaling	5	-3.41283	-1.51887	RHOA|CALR|CD27|EZR|LITAF
GO:1901224	GO Biological Processes	positive regulation of NIK/NF-kappaB signaling	3	-2.66851	-0.927961	RHOA|CALR|CD27
GO:0001816	GO Biological Processes	cytokine production	11	-4.232	-2.15007	CAMK4|CD247|CD74|CCR7|LTB|SRGN|EZR|ZFP36|LITAF|NOP53|LEF1
GO:0001817	GO Biological Processes	regulation of cytokine production	9	-3.20728	-1.36337	CD74|CCR7|LTB|SRGN|EZR|ZFP36|LITAF|NOP53|LEF1
GO:0031098	GO Biological Processes	stress-activated protein kinase signaling cascade	6	-3.18823	-1.34872	RHOA|CD27|CCR7|UBB|EZR|ZFP36
GO:0032623	GO Biological Processes	interleukin-2 production	3	-2.93955	-1.15491	CD247|EZR|ZFP36
GO:0051403	GO Biological Processes	stress-activated MAPK cascade	5	-2.56865	-0.842976	CD27|CCR7|UBB|EZR|ZFP36
R-HSA-2173788	Reactome Gene Sets	Downregulation of TGF-beta receptor signaling	3	-4.06506	-2.02926	PPP1CA|UBB|PPP1R15A
R-HSA-170834	Reactome Gene Sets	Signaling by TGF-beta Receptor Complex	4	-3.99117	-1.97557	RHOA|PPP1CA|UBB|PPP1R15A
R-HSA-2173789	Reactome Gene Sets	TGF-beta receptor signaling activates SMADs	3	-3.79077	-1.8157	PPP1CA|UBB|PPP1R15A
R-HSA-9006936	Reactome Gene Sets	Signaling by TGF-beta family members	4	-3.43117	-1.53221	RHOA|PPP1CA|UBB|PPP1R15A
GO:0006417	GO Biological Processes	regulation of translation	7	-3.28146	-1.42098	RHOA|ZFP36L2|CALR|PPP1CA|CCL5|ZFP36|PPP1R15A
GO:0034248	GO Biological Processes	regulation of cellular amide metabolic process	7	-2.95114	-1.16263	RHOA|ZFP36L2|CALR|PPP1CA|CCL5|ZFP36|PPP1R15A
GO:0006446	GO Biological Processes	regulation of translational initiation	3	-2.63673	-0.89923	PPP1CA|CCL5|PPP1R15A
GO:0045727	GO Biological Processes	positive regulation of translation	3	-2.0611	-0.426447	RHOA|CCL5|PPP1R15A
GO:1903322	GO Biological Processes	positive regulation of protein modification by small protein conjugation or removal	5	-4.0607	-2.02719	HSPA5|RPS2|UBB|NOP53|NDFIP1
GO:0031398	GO Biological Processes	positive regulation of protein ubiquitination	4	-3.20578	-1.36334	HSPA5|RPS2|UBB|NDFIP1
GO:1903320	GO Biological Processes	regulation of protein modification by small protein conjugation or removal	5	-2.98791	-1.18641	HSPA5|RPS2|UBB|NOP53|NDFIP1
GO:0031396	GO Biological Processes	regulation of protein ubiquitination	4	-2.32445	-0.642838	HSPA5|RPS2|UBB|NDFIP1
GO:0046651	GO Biological Processes	lymphocyte proliferation	6	-3.52257	-1.60651	CD74|FLT3LG|IL7R|MSN|CCL5|LEF1
GO:0032943	GO Biological Processes	mononuclear cell proliferation	6	-3.50572	-1.5914	CD74|FLT3LG|IL7R|MSN|CCL5|LEF1
GO:0043900	GO Biological Processes	regulation of multi-organism process	7	-3.39337	-1.50435	CALR|CD74|PPIB|CCL5|ZFP36|NOP53|LEF1
GO:0048524	GO Biological Processes	positive regulation of viral process	4	-3.35225	-1.47135	CD74|PPIB|CCL5|LEF1
GO:0070661	GO Biological Processes	leukocyte proliferation	6	-3.31376	-1.43925	CD74|FLT3LG|IL7R|MSN|CCL5|LEF1
GO:0050792	GO Biological Processes	regulation of viral process	5	-3.19212	-1.35115	CD74|PPIB|CCL5|ZFP36|LEF1
GO:0043903	GO Biological Processes	regulation of symbiosis, encompassing mutualism through parasitism	5	-3.06495	-1.251	CD74|PPIB|CCL5|ZFP36|LEF1
GO:0061077	GO Biological Processes	chaperone-mediated protein folding	3	-3.00217	-1.19911	CD74|HSPA5|PPIB
GO:1903902	GO Biological Processes	positive regulation of viral life cycle	3	-2.96005	-1.17024	CD74|PPIB|CCL5
GO:0046782	GO Biological Processes	regulation of viral transcription	3	-2.89957	-1.12133	CCL5|ZFP36|LEF1
GO:0051851	GO Biological Processes	modification by host of symbiont morphology or physiology	3	-2.66851	-0.927961	PPIB|CCL5|LEF1
GO:0051702	GO Biological Processes	interaction with symbiont	3	-2.59064	-0.861575	PPIB|CCL5|LEF1
hsa05168	KEGG Pathway	Herpes simplex infection	4	-2.47512	-0.769238	CD74|PPP1CA|CCL5|NOP53
GO:0043902	GO Biological Processes	positive regulation of multi-organism process	4	-2.45018	-0.748582	CD74|PPIB|CCL5|LEF1
GO:0042100	GO Biological Processes	B cell proliferation	3	-2.41006	-0.712692	CD74|IL7R|LEF1
GO:0002573	GO Biological Processes	myeloid leukocyte differentiation	4	-2.31697	-0.639184	CAMK4|CD74|CCR7|LEF1
GO:0051817	GO Biological Processes	modification of morphology or physiology of other organism involved in symbiotic interaction	3	-2.2109	-0.544059	PPIB|CCL5|LEF1
GO:0002761	GO Biological Processes	regulation of myeloid leukocyte differentiation	3	-2.15861	-0.499563	CAMK4|CD74|LEF1
GO:0002460	GO Biological Processes	adaptive immune response based on somatic recombination of immune receptors built from immunoglobuli	5	-2.14606	-0.490858	CD27|CD74|GZMM|IL7R|LEF1
GO:0002250	GO Biological Processes	adaptive immune response	7	-2.13908	-0.487938	CAMK4|CD247|CD27|CD74|GZMM|IL7R|LEF1
GO:0050671	GO Biological Processes	positive regulation of lymphocyte proliferation	3	-2.03351	-0.403394	CD74|FLT3LG|CCL5
GO:0032946	GO Biological Processes	positive regulation of mononuclear cell proliferation	3	-2.02447	-0.396818	CD74|FLT3LG|CCL5
GO:0045637	GO Biological Processes	regulation of myeloid cell differentiation	4	-2.00652	-0.383571	CAMK4|CD74|ZFP36|LEF1
GO:0034394	GO Biological Processes	protein localization to cell surface	3	-2.91939	-1.13861	CD247|FLNA|LEPROTL1
hsa05142	KEGG Pathway	Chagas disease (American trypanosomiasis)	3	-2.32366	-0.642838	CALR|CD247|CCL5
R-HSA-418594	Reactome Gene Sets	G alpha (i) signalling events	6	-2.6343	-0.898377	CAMK4|CCR7|PPP1CA|PSAP|RGS10|CCL5
GO:0009636	GO Biological Processes	response to toxic substance	6	-2.10035	-0.458338	ACTB|RHOA|CD27|PSAP|RGS10|CCL5
GO:0071356	GO Biological Processes	cellular response to tumor necrosis factor	5	-2.54932	-0.829237	ZFP36L2|CD27|LTB|CCL5|ZFP36
GO:0034612	GO Biological Processes	response to tumor necrosis factor	5	-2.42031	-0.72083	ZFP36L2|CD27|LTB|CCL5|ZFP36
R-HSA-5668541	Reactome Gene Sets	TNFR2 non-canonical NF-kB pathway	3	-2.32366	-0.642838	CD27|LTB|UBB
GO:0042035	GO Biological Processes	regulation of cytokine biosynthetic process	3	-2.18968	-0.524801	CD74|LTB|ZFP36
GO:0042089	GO Biological Processes	cytokine biosynthetic process	3	-2.09905	-0.457956	CD74|LTB|ZFP36
GO:0042107	GO Biological Processes	cytokine metabolic process	3	-2.08943	-0.450191	CD74|LTB|ZFP36
GO:0050821	GO Biological Processes	protein stabilization	4	-2.53513	-0.817259	CALR|FLNA|PPIB|NOP53
GO:0002221	GO Biological Processes	pattern recognition receptor signaling pathway	4	-2.3548	-0.666816	ITGB2|HSP90B1|UBB|NOP53
GO:0001666	GO Biological Processes	response to hypoxia	5	-2.16584	-0.504851	AQP3|RHOA|HSP90B1|UBB|NOP53
GO:0036293	GO Biological Processes	response to decreased oxygen levels	5	-2.1121	-0.466357	AQP3|RHOA|HSP90B1|UBB|NOP53
GO:0031349	GO Biological Processes	positive regulation of defense response	6	-2.10422	-0.461276	CCR7|ITGB2|CCL5|HSP90B1|UBB|NOP53
GO:0045089	GO Biological Processes	positive regulation of innate immune response	5	-2.04649	-0.412749	ITGB2|CCL5|HSP90B1|UBB|NOP53
GO:0070482	GO Biological Processes	response to oxygen levels	5	-2.00142	-0.379355	AQP3|RHOA|HSP90B1|UBB|NOP53
GO:0051153	GO Biological Processes	regulation of striated muscle cell differentiation	3	-2.13839	-0.487938	CD53|FLT3LG|AKAP13
GO:0003014	GO Biological Processes	renal system process	3	-2.12842	-0.479854	AQP3|RHOA|PSAP
GO:0042476	GO Biological Processes	odontogenesis	3	-2.01551	-0.389166	AQP3|RHOA|LEF1

## Sheet: B cell
GO	Category	Description	counts	LogP	Log(q-value)	Gene list
hsa04640	KEGG Pathway	Hematopoietic cell lineage	15	-20.5314	-16.2192	CD19|MS4A1|CD37|CD55|FCER2|HLA-DMA|HLA-DMB|HLA-DPA1|HLA-DPB1|HLA-DQA1|HLA-DQB1|HLA-DRA|HLA-DRB1|HLA-DRB5|IL4R
hsa05140	KEGG Pathway	Leishmaniasis	13	-18.6674	-14.6562	HLA-DMA|HLA-DMB|HLA-DPA1|HLA-DPB1|HLA-DQA1|HLA-DQB1|HLA-DRA|HLA-DRB1|HLA-DRB5|ITGB2|PRKCB|PTPN6|NCF1
GO:0002250	GO Biological Processes	adaptive immune response	24	-17.5528	-13.7176	CD19|CD74|CD79A|CD79B|CTSH|CD55|FCER2|HLA-DMA|HLA-DMB|HLA-DPA1|HLA-DPB1|HLA-DQA1|HLA-DQB1|HLA-DRA|HLA-DRB1|HLA-DRB5|JCHAIN|IL4R|MEF2C|POU2F2|PRKCB|PTPN6|SYK|SWAP70
R-HSA-1280218	Reactome Gene Sets	Adaptive Immune System	24	-16.468	-12.8548	BLK|CD19|CD74|CD79A|CD79B|MAP3K8|CTSH|GRB2|HLA-DMB|HLA-DPA1|HLA-DPB1|HLA-DQA1|HLA-DQB1|HLA-DRA|HLA-DRB1|HLA-DRB5|ITGB2|PRKCB|PTPN6|REL|SYK|IFITM1|UBE2J1|NCF1
hsa05416	KEGG Pathway	Viral myocarditis	11	-16.0741	-12.54	CD55|HLA-DMA|HLA-DMB|HLA-DPA1|HLA-DPB1|HLA-DQA1|HLA-DQB1|HLA-DRA|HLA-DRB1|HLA-DRB5|ITGB2
hsa05310	KEGG Pathway	Asthma	9	-15.1413	-11.6741	HLA-DMA|HLA-DMB|HLA-DPA1|HLA-DPB1|HLA-DQA1|HLA-DQB1|HLA-DRA|HLA-DRB1|HLA-DRB5
hsa05150	KEGG Pathway	Staphylococcus aureus infection	10	-14.4419	-11.0328	HLA-DMA|HLA-DMB|HLA-DPA1|HLA-DPB1|HLA-DQA1|HLA-DQB1|HLA-DRA|HLA-DRB1|HLA-DRB5|ITGB2
hsa05330	KEGG Pathway	Allograft rejection	9	-14.2418	-10.9211	HLA-DMA|HLA-DMB|HLA-DPA1|HLA-DPB1|HLA-DQA1|HLA-DQB1|HLA-DRA|HLA-DRB1|HLA-DRB5
R-HSA-389948	Reactome Gene Sets	PD-1 signaling	8	-14.2334	-10.9211	HLA-DPA1|HLA-DPB1|HLA-DQA1|HLA-DQB1|HLA-DRA|HLA-DRB1|HLA-DRB5|PTPN6
GO:0050851	GO Biological Processes	antigen receptor-mediated signaling pathway	16	-14.0153	-10.7445	BLK|CD19|MS4A1|CD79A|CD79B|HLA-DPA1|HLA-DPB1|HLA-DQA1|HLA-DQB1|HLA-DRA|HLA-DRB1|HLA-DRB5|MEF2C|PRKCB|PTPN6|SYK
hsa05332	KEGG Pathway	Graft-versus-host disease	9	-13.9131	-10.68	HLA-DMA|HLA-DMB|HLA-DPA1|HLA-DPB1|HLA-DQA1|HLA-DQB1|HLA-DRA|HLA-DRB1|HLA-DRB5
hsa05321	KEGG Pathway	Inflammatory bowel disease (IBD)	10	-13.7512	-10.5529	HLA-DMA|HLA-DMB|HLA-DPA1|HLA-DPB1|HLA-DQA1|HLA-DQB1|HLA-DRA|HLA-DRB1|HLA-DRB5|IL4R
hsa04940	KEGG Pathway	Type I diabetes mellitus	9	-13.7087	-10.5426	HLA-DMA|HLA-DMB|HLA-DPA1|HLA-DPB1|HLA-DQA1|HLA-DQB1|HLA-DRA|HLA-DRB1|HLA-DRB5
R-HSA-388841	Reactome Gene Sets	Costimulation by the CD28 family	10	-13.4115	-10.2754	MAP3K8|GRB2|HLA-DPA1|HLA-DPB1|HLA-DQA1|HLA-DQB1|HLA-DRA|HLA-DRB1|HLA-DRB5|PTPN6
GO:0002495	GO Biological Processes	antigen processing and presentation of peptide antigen via MHC class II	11	-13.3691	-10.2609	CD74|HLA-DMA|HLA-DMB|HLA-DPA1|HLA-DPB1|HLA-DQA1|HLA-DQB1|HLA-DRA|HLA-DRB1|HLA-DRB5|MARCHF1
GO:0002504	GO Biological Processes	antigen processing and presentation of peptide or polysaccharide antigen via MHC class II	11	-13.3207	-10.2389	CD74|HLA-DMA|HLA-DMB|HLA-DPA1|HLA-DPB1|HLA-DQA1|HLA-DQB1|HLA-DRA|HLA-DRB1|HLA-DRB5|MARCHF1
hsa04672	KEGG Pathway	Intestinal immune network for IgA production	9	-13.1544	-10.0974	HLA-DMA|HLA-DMB|HLA-DPA1|HLA-DPB1|HLA-DQA1|HLA-DQB1|HLA-DRA|HLA-DRB1|HLA-DRB5
hsa04612	KEGG Pathway	Antigen processing and presentation	10	-12.9781	-9.94455	CD74|HLA-DMA|HLA-DMB|HLA-DPA1|HLA-DPB1|HLA-DQA1|HLA-DQB1|HLA-DRA|HLA-DRB1|HLA-DRB5
hsa05320	KEGG Pathway	Autoimmune thyroid disease	9	-12.8252	-9.83518	HLA-DMA|HLA-DMB|HLA-DPA1|HLA-DPB1|HLA-DQA1|HLA-DQB1|HLA-DRA|HLA-DRB1|HLA-DRB5
R-HSA-202430	Reactome Gene Sets	Translocation of ZAP-70 to Immunological synapse	7	-12.7101	-9.74027	HLA-DPA1|HLA-DPB1|HLA-DQA1|HLA-DQB1|HLA-DRA|HLA-DRB1|HLA-DRB5
GO:0002429	GO Biological Processes	immune response-activating cell surface receptor signaling pathway	17	-12.4606	-9.51011	BLK|CD19|MS4A1|CD79A|CD79B|GRB2|HLA-DPA1|HLA-DPB1|HLA-DQA1|HLA-DQB1|HLA-DRA|HLA-DRB1|HLA-DRB5|MEF2C|PRKCB|PTPN6|SYK
hsa05323	KEGG Pathway	Rheumatoid arthritis	10	-12.2762	-9.3441	HLA-DMA|HLA-DMB|HLA-DPA1|HLA-DPB1|HLA-DQA1|HLA-DQB1|HLA-DRA|HLA-DRB1|HLA-DRB5|ITGB2
R-HSA-202427	Reactome Gene Sets	Phosphorylation of CD3 and TCR zeta chains	7	-12.1841	-9.29709	HLA-DPA1|HLA-DPB1|HLA-DQA1|HLA-DQB1|HLA-DRA|HLA-DRB1|HLA-DRB5
R-HSA-877300	Reactome Gene Sets	Interferon gamma signaling	10	-12.178	-9.29709	HLA-DPA1|HLA-DPB1|HLA-DQA1|HLA-DQB1|HLA-DRA|HLA-DRB1|HLA-DRB5|IRF8|PTPN6|SP100
hsa04658	KEGG Pathway	Th1 and Th2 cell differentiation	10	-12.178	-9.29709	HLA-DMA|HLA-DMB|HLA-DPA1|HLA-DPB1|HLA-DQA1|HLA-DQB1|HLA-DRA|HLA-DRB1|HLA-DRB5|IL4R
GO:0019882	GO Biological Processes	antigen processing and presentation	13	-12.0996	-9.23449	CD74|CTSH|HLA-DMA|HLA-DMB|HLA-DPA1|HLA-DPB1|HLA-DQA1|HLA-DQB1|HLA-DRA|HLA-DRB1|HLA-DRB5|MARCHF1|NCF1
GO:0002764	GO Biological Processes	immune response-regulating signaling pathway	19	-12.0149	-9.17053	BLK|CD19|MS4A1|CD79A|CD79B|CTSH|GRB2|HLA-DPA1|HLA-DPB1|HLA-DQA1|HLA-DQB1|HLA-DRA|HLA-DRB1|HLA-DRB5|ITGB2|MEF2C|PRKCB|PTPN6|SYK
hsa05152	KEGG Pathway	Tuberculosis	12	-12.0008	-9.17053	CD74|HLA-DMA|HLA-DMB|HLA-DPA1|HLA-DPB1|HLA-DQA1|HLA-DQB1|HLA-DRA|HLA-DRB1|HLA-DRB5|ITGB2|SYK
GO:0002768	GO Biological Processes	immune response-regulating cell surface receptor signaling pathway	17	-11.9914	-9.17053	BLK|CD19|MS4A1|CD79A|CD79B|GRB2|HLA-DPA1|HLA-DPB1|HLA-DQA1|HLA-DQB1|HLA-DRA|HLA-DRB1|HLA-DRB5|MEF2C|PRKCB|PTPN6|SYK
GO:0019886	GO Biological Processes	antigen processing and presentation of exogenous peptide antigen via MHC class II	10	-11.8967	-9.08963	CD74|HLA-DMA|HLA-DMB|HLA-DPA1|HLA-DPB1|HLA-DQA1|HLA-DQB1|HLA-DRA|HLA-DRB1|HLA-DRB5
GO:0048002	GO Biological Processes	antigen processing and presentation of peptide antigen	12	-11.6931	-8.8994	CD74|HLA-DMA|HLA-DMB|HLA-DPA1|HLA-DPB1|HLA-DQA1|HLA-DQB1|HLA-DRA|HLA-DRB1|HLA-DRB5|MARCHF1|NCF1
hsa04659	KEGG Pathway	Th17 cell differentiation	10	-11.5079	-8.72712	HLA-DMA|HLA-DMB|HLA-DPA1|HLA-DPB1|HLA-DQA1|HLA-DQB1|HLA-DRA|HLA-DRB1|HLA-DRB5|IL4R
GO:0002253	GO Biological Processes	activation of immune response	19	-11.4856	-8.71744	BLK|CD19|MS4A1|CD79A|CD79B|CD55|GRB2|HLA-DPA1|HLA-DPB1|HLA-DQA1|HLA-DQB1|HLA-DRA|HLA-DRB1|HLA-DRB5|ITGB2|MEF2C|PRKCB|PTPN6|SYK
R-HSA-913531	Reactome Gene Sets	Interferon Signaling	12	-11.4554	-8.69941	FLNA|HLA-DPA1|HLA-DPB1|HLA-DQA1|HLA-DQB1|HLA-DRA|HLA-DRB1|HLA-DRB5|IRF8|PTPN6|SP100|IFITM1
GO:0002757	GO Biological Processes	immune response-activating signal transduction	18	-11.359	-8.61493	BLK|CD19|MS4A1|CD79A|CD79B|GRB2|HLA-DPA1|HLA-DPB1|HLA-DQA1|HLA-DQB1|HLA-DRA|HLA-DRB1|HLA-DRB5|ITGB2|MEF2C|PRKCB|PTPN6|SYK
hsa04145	KEGG Pathway	Phagosome	11	-11.3298	-8.59729	HLA-DMA|HLA-DMB|HLA-DPA1|HLA-DPB1|HLA-DQA1|HLA-DQB1|HLA-DRA|HLA-DRB1|HLA-DRB5|ITGB2|NCF1
R-HSA-2132295	Reactome Gene Sets	MHC class II antigen presentation	10	-10.8964	-8.21762	CD74|CTSH|HLA-DMB|HLA-DPA1|HLA-DPB1|HLA-DQA1|HLA-DQB1|HLA-DRA|HLA-DRB1|HLA-DRB5
R-HSA-202433	Reactome Gene Sets	Generation of second messenger molecules	7	-10.7983	-8.12954	HLA-DPA1|HLA-DPB1|HLA-DQA1|HLA-DQB1|HLA-DRA|HLA-DRB1|HLA-DRB5
GO:0019221	GO Biological Processes	cytokine-mediated signaling pathway	19	-10.7859	-8.1269	CD74|MAP3K8|FCER2|GRB2|HLA-DPA1|HLA-DPB1|HLA-DQA1|HLA-DQB1|HLA-DRA|HLA-DRB1|HLA-DRB5|IRF8|IL4R|ITGB2|PTPN6|SP100|SYK|IFITM1|IL32
GO:0002478	GO Biological Processes	antigen processing and presentation of exogenous peptide antigen	11	-10.7243	-8.07482	CD74|HLA-DMA|HLA-DMB|HLA-DPA1|HLA-DPB1|HLA-DQA1|HLA-DQB1|HLA-DRA|HLA-DRB1|HLA-DRB5|NCF1
GO:0060333	GO Biological Processes	interferon-gamma-mediated signaling pathway	9	-10.6226	-7.99157	HLA-DPA1|HLA-DPB1|HLA-DQA1|HLA-DQB1|HLA-DRA|HLA-DRB1|HLA-DRB5|IRF8|SP100
GO:0019884	GO Biological Processes	antigen processing and presentation of exogenous antigen	11	-10.5397	-7.91765	CD74|HLA-DMA|HLA-DMB|HLA-DPA1|HLA-DPB1|HLA-DQA1|HLA-DQB1|HLA-DRA|HLA-DRB1|HLA-DRB5|NCF1
hsa05168	KEGG Pathway	Herpes simplex infection	11	-10.4629	-7.84964	CD74|HLA-DMA|HLA-DMB|HLA-DPA1|HLA-DPB1|HLA-DQA1|HLA-DQB1|HLA-DRA|HLA-DRB1|HLA-DRB5|SP100
hsa04514	KEGG Pathway	Cell adhesion molecules (CAMs)	10	-10.2123	-7.60761	HLA-DMA|HLA-DMB|HLA-DPA1|HLA-DPB1|HLA-DQA1|HLA-DQB1|HLA-DRA|HLA-DRB1|HLA-DRB5|ITGB2
hsa05145	KEGG Pathway	Toxoplasmosis	9	-9.76685	-7.21802	HLA-DMA|HLA-DMB|HLA-DPA1|HLA-DPB1|HLA-DQA1|HLA-DQB1|HLA-DRA|HLA-DRB1|HLA-DRB5
hsa05164	KEGG Pathway	Influenza A	10	-9.42602	-6.88461	HLA-DMA|HLA-DMB|HLA-DPA1|HLA-DPB1|HLA-DQA1|HLA-DQB1|HLA-DRA|HLA-DRB1|HLA-DRB5|PRKCB
hsa05322	KEGG Pathway	Systemic lupus erythematosus	9	-9.13176	-6.63241	HLA-DMA|HLA-DMB|HLA-DPA1|HLA-DPB1|HLA-DQA1|HLA-DQB1|HLA-DRA|HLA-DRB1|HLA-DRB5
hsa05166	KEGG Pathway	HTLV-I infection	11	-8.95771	-6.4843	HLA-DMA|HLA-DMB|HLA-DPA1|HLA-DPB1|HLA-DQA1|HLA-DQB1|HLA-DRA|HLA-DRB1|HLA-DRB5|ITGB2|POLD4
GO:0034341	GO Biological Processes	response to interferon-gamma	10	-8.83339	-6.37239	HLA-DPA1|HLA-DPB1|HLA-DQA1|HLA-DQB1|HLA-DRA|HLA-DRB1|HLA-DRB5|IRF8|SP100|IFITM1
hsa05169	KEGG Pathway	Epstein-Barr virus infection	10	-8.79132	-6.34238	CD19|FCER2|HLA-DPA1|HLA-DPB1|HLA-DQA1|HLA-DQB1|HLA-DRA|HLA-DRB1|HLA-DRB5|SYK
GO:0071346	GO Biological Processes	cellular response to interferon-gamma	9	-7.97278	-5.54701	HLA-DPA1|HLA-DPB1|HLA-DQA1|HLA-DQB1|HLA-DRA|HLA-DRB1|HLA-DRB5|IRF8|SP100
R-HSA-202424	Reactome Gene Sets	Downstream TCR signaling	7	-7.36481	-4.97683	HLA-DPA1|HLA-DPB1|HLA-DQA1|HLA-DQB1|HLA-DRA|HLA-DRB1|HLA-DRB5
R-HSA-202403	Reactome Gene Sets	TCR signaling	7	-6.78225	-4.42423	HLA-DPA1|HLA-DPB1|HLA-DQA1|HLA-DQB1|HLA-DRA|HLA-DRB1|HLA-DRB5
GO:0050852	GO Biological Processes	T cell receptor signaling pathway	8	-6.35961	-4.03412	HLA-DPA1|HLA-DPB1|HLA-DQA1|HLA-DQB1|HLA-DRA|HLA-DRB1|HLA-DRB5|PTPN6
GO:0046649	GO Biological Processes	lymphocyte activation	24	-16.7572	-13.047	ZFP36L1|CD19|MS4A1|CD74|CD79A|CD79B|MAP3K8|CD55|GRB2|HLA-DMB|HLA-DPA1|HLA-DPB1|IL4R|ITGB2|MEF2C|POU2F2|PRKCB|PTPN6|SYK|TPD52|CD83|SWAP70|MZB1|BANK1
GO:0051249	GO Biological Processes	regulation of lymphocyte activation	16	-11.1707	-8.44948	ZFP36L1|CD19|CD74|MAP3K8|CD55|GRB2|HLA-DMB|HLA-DPA1|HLA-DPB1|IL4R|MEF2C|PTPN6|SYK|CD83|MZB1|BANK1
GO:0002694	GO Biological Processes	regulation of leukocyte activation	17	-11.1228	-8.41259	ZFP36L1|CD19|CD74|MAP3K8|CD55|GRB2|HLA-DMB|HLA-DPA1|HLA-DPB1|IL4R|ITGB2|MEF2C|PTPN6|SYK|CD83|MZB1|BANK1
GO:1903039	GO Biological Processes	positive regulation of leukocyte cell-cell adhesion	12	-10.9893	-8.28982	CD74|MAP3K8|CD55|GRB2|HLA-DMB|HLA-DPA1|HLA-DPB1|IL4R|ITGB2|PTPN6|SYK|CD83
GO:0050865	GO Biological Processes	regulation of cell activation	17	-10.6306	-7.99157	ZFP36L1|CD19|CD74|MAP3K8|CD55|GRB2|HLA-DMB|HLA-DPA1|HLA-DPB1|IL4R|ITGB2|MEF2C|PTPN6|SYK|CD83|MZB1|BANK1
GO:0022409	GO Biological Processes	positive regulation of cell-cell adhesion	12	-10.1958	-7.59959	CD74|MAP3K8|CD55|GRB2|HLA-DMB|HLA-DPA1|HLA-DPB1|IL4R|ITGB2|PTPN6|SYK|CD83
GO:0050870	GO Biological Processes	positive regulation of T cell activation	11	-10.0517	-7.46369	CD74|MAP3K8|CD55|GRB2|HLA-DMB|HLA-DPA1|HLA-DPB1|IL4R|PTPN6|SYK|CD83
GO:0046651	GO Biological Processes	lymphocyte proliferation	12	-9.83553	-7.26363	CD19|MS4A1|CD74|CD79A|CD55|HLA-DMB|HLA-DPA1|HLA-DPB1|MEF2C|PTPN6|SYK|MZB1
GO:0032943	GO Biological Processes	mononuclear cell proliferation	12	-9.79918	-7.2428	CD19|MS4A1|CD74|CD79A|CD55|HLA-DMB|HLA-DPA1|HLA-DPB1|MEF2C|PTPN6|SYK|MZB1
GO:0070661	GO Biological Processes	leukocyte proliferation	12	-9.3842	-6.85009	CD19|MS4A1|CD74|CD79A|CD55|HLA-DMB|HLA-DPA1|HLA-DPB1|MEF2C|PTPN6|SYK|MZB1
GO:1903037	GO Biological Processes	regulation of leukocyte cell-cell adhesion	12	-9.31857	-6.79164	CD74|MAP3K8|CD55|GRB2|HLA-DMB|HLA-DPA1|HLA-DPB1|IL4R|ITGB2|PTPN6|SYK|CD83
GO:0002696	GO Biological Processes	positive regulation of leukocyte activation	13	-9.30666	-6.78679	CD74|MAP3K8|CD55|GRB2|HLA-DMB|HLA-DPA1|HLA-DPB1|IL4R|ITGB2|MEF2C|PTPN6|SYK|CD83
GO:0050867	GO Biological Processes	positive regulation of cell activation	13	-9.11547	-6.62275	CD74|MAP3K8|CD55|GRB2|HLA-DMB|HLA-DPA1|HLA-DPB1|IL4R|ITGB2|MEF2C|PTPN6|SYK|CD83
GO:0045785	GO Biological Processes	positive regulation of cell adhesion	13	-8.99647	-6.51029	CD74|MAP3K8|CD55|FLNA|GRB2|HLA-DMB|HLA-DPA1|HLA-DPB1|IL4R|ITGB2|PTPN6|SYK|CD83
GO:0022407	GO Biological Processes	regulation of cell-cell adhesion	13	-8.97043	-6.49068	CD74|MAP3K8|CD55|GRB2|HLA-DMB|HLA-DPA1|HLA-DPB1|IL4R|ITGB2|PTPN6|SYK|CD83|SWAP70
GO:0051251	GO Biological Processes	positive regulation of lymphocyte activation	12	-8.85456	-6.3874	CD74|MAP3K8|CD55|GRB2|HLA-DMB|HLA-DPA1|HLA-DPB1|IL4R|MEF2C|PTPN6|SYK|CD83
GO:0007159	GO Biological Processes	leukocyte cell-cell adhesion	12	-8.8107	-6.35577	CD74|MAP3K8|CD55|GRB2|HLA-DMB|HLA-DPA1|HLA-DPB1|IL4R|ITGB2|PTPN6|SYK|CD83
GO:0050863	GO Biological Processes	regulation of T cell activation	11	-8.03278	-5.60133	CD74|MAP3K8|CD55|GRB2|HLA-DMB|HLA-DPA1|HLA-DPB1|IL4R|PTPN6|SYK|CD83
GO:0050670	GO Biological Processes	regulation of lymphocyte proliferation	9	-7.4288	-5.0198	CD74|CD55|HLA-DMB|HLA-DPA1|HLA-DPB1|MEF2C|PTPN6|SYK|MZB1
GO:0032944	GO Biological Processes	regulation of mononuclear cell proliferation	9	-7.41087	-5.01242	CD74|CD55|HLA-DMB|HLA-DPA1|HLA-DPB1|MEF2C|PTPN6|SYK|MZB1
GO:0042110	GO Biological Processes	T cell activation	12	-7.24899	-4.87123	ZFP36L1|CD74|MAP3K8|CD55|GRB2|HLA-DMB|HLA-DPA1|HLA-DPB1|IL4R|PTPN6|SYK|CD83
GO:0070663	GO Biological Processes	regulation of leukocyte proliferation	9	-7.18592	-4.81814	CD74|CD55|HLA-DMB|HLA-DPA1|HLA-DPB1|MEF2C|PTPN6|SYK|MZB1
GO:0030155	GO Biological Processes	regulation of cell adhesion	14	-7.08864	-4.72577	CD74|MAP3K8|CD55|FLNA|GRB2|HLA-DMB|HLA-DPA1|HLA-DPB1|IL4R|ITGB2|PTPN6|SYK|CD83|SWAP70
GO:0050671	GO Biological Processes	positive regulation of lymphocyte proliferation	7	-6.51974	-4.17127	CD74|CD55|HLA-DMB|HLA-DPA1|HLA-DPB1|MEF2C|SYK
GO:0032946	GO Biological Processes	positive regulation of mononuclear cell proliferation	7	-6.49707	-4.15329	CD74|CD55|HLA-DMB|HLA-DPA1|HLA-DPB1|MEF2C|SYK
GO:0070665	GO Biological Processes	positive regulation of leukocyte proliferation	7	-6.32217	-4.00113	CD74|CD55|HLA-DMB|HLA-DPA1|HLA-DPB1|MEF2C|SYK
GO:0001816	GO Biological Processes	cytokine production	13	-5.59519	-3.28725	ATP2B1|CD74|CD55|HLA-DPA1|HLA-DPB1|IRF8|IL4R|PTPN6|REL|SYK|CD83|UBE2J1|BANK1
GO:0001817	GO Biological Processes	regulation of cytokine production	12	-5.25878	-2.95936	ATP2B1|CD74|HLA-DPA1|HLA-DPB1|IRF8|IL4R|PTPN6|REL|SYK|CD83|UBE2J1|BANK1
GO:0042129	GO Biological Processes	regulation of T cell proliferation	6	-4.81269	-2.53385	CD55|HLA-DMB|HLA-DPA1|HLA-DPB1|PTPN6|SYK
GO:0042102	GO Biological Processes	positive regulation of T cell proliferation	5	-4.74056	-2.46572	CD55|HLA-DMB|HLA-DPA1|HLA-DPB1|SYK
GO:0042098	GO Biological Processes	T cell proliferation	6	-4.38254	-2.1156	CD55|HLA-DMB|HLA-DPA1|HLA-DPB1|PTPN6|SYK
GO:0001819	GO Biological Processes	positive regulation of cytokine production	7	-2.99359	-0.928409	CD74|HLA-DPA1|HLA-DPB1|IRF8|IL4R|SYK|CD83
GO:0042113	GO Biological Processes	B cell activation	15	-12.8589	-9.84763	ZFP36L1|CD19|MS4A1|CD74|CD79A|CD79B|MEF2C|POU2F2|PRKCB|PTPN6|SYK|TPD52|SWAP70|MZB1|BANK1
R-HSA-983695	Reactome Gene Sets	Antigen activates B Cell Receptor (BCR) leading to generation of second messengers	7	-10.9007	-8.21762	BLK|CD19|CD79A|CD79B|GRB2|PTPN6|SYK
hsa04662	KEGG Pathway	B cell receptor signaling pathway	8	-9.95381	-7.37394	CD19|CD79A|CD79B|GRB2|PRKCB|PTPN6|SYK|IFITM1
R-HSA-983705	Reactome Gene Sets	Signaling by the B Cell Receptor (BCR)	9	-9.80171	-7.2428	BLK|CD19|CD79A|CD79B|GRB2|PRKCB|PTPN6|REL|SYK
GO:0050853	GO Biological Processes	B cell receptor signaling pathway	9	-9.25019	-6.73727	BLK|CD19|MS4A1|CD79A|CD79B|MEF2C|PRKCB|PTPN6|SYK
GO:0030183	GO Biological Processes	B cell differentiation	9	-9.19049	-6.68441	ZFP36L1|CD19|MS4A1|CD79A|CD79B|POU2F2|PTPN6|SYK|TPD52
GO:0002521	GO Biological Processes	leukocyte differentiation	14	-8.69621	-6.25318	PARP1|ZFP36L1|CD19|MS4A1|CD74|CD79A|CD79B|IL4R|MEF2C|POU2F2|PTPN6|SYK|TPD52|CD83
GO:0030098	GO Biological Processes	lymphocyte differentiation	12	-8.58377	-6.14657	ZFP36L1|CD19|MS4A1|CD74|CD79A|CD79B|IL4R|POU2F2|PTPN6|SYK|TPD52|CD83
R-HSA-5690714	Reactome Gene Sets	CD22 mediated BCR regulation	3	-6.42571	-4.09572	CD79A|CD79B|PTPN6
GO:0006959	GO Biological Processes	humoral immune response	11	-7.44863	-5.02846	CD19|MS4A1|CD55|FCER2|HLA-DQB1|JCHAIN|MEF2C|POU2AF1|POU2F2|PTPN6|CD83
GO:0002460	GO Biological Processes	adaptive immune response based on somatic recombination of immune receptors built from immunoglobuli	11	-7.38733	-4.99414	CD19|CD74|CTSH|CD55|FCER2|HLA-DQB1|IL4R|MEF2C|POU2F2|PTPN6|SWAP70
GO:0016064	GO Biological Processes	immunoglobulin mediated immune response	9	-7.25358	-4.87123	CD19|CD74|CD55|FCER2|HLA-DQB1|IL4R|POU2F2|PTPN6|SWAP70
GO:0019724	GO Biological Processes	B cell mediated immunity	9	-7.20271	-4.82997	CD19|CD74|CD55|FCER2|HLA-DQB1|IL4R|POU2F2|PTPN6|SWAP70
GO:0002449	GO Biological Processes	lymphocyte mediated immunity	10	-6.48246	-4.14332	CD19|CD74|CTSH|CD55|FCER2|HLA-DQB1|IL4R|POU2F2|PTPN6|SWAP70
GO:0002440	GO Biological Processes	production of molecular mediator of immune response	8	-5.21081	-2.91559	CD74|CD55|HLA-DQB1|IL4R|POU2F2|SWAP70|VPREB3|MZB1
GO:0002377	GO Biological Processes	immunoglobulin production	6	-4.28068	-2.01763	HLA-DQB1|IL4R|POU2F2|SWAP70|VPREB3|MZB1
GO:0002381	GO Biological Processes	immunoglobulin production involved in immunoglobulin mediated immune response	3	-3.03713	-0.95786	HLA-DQB1|POU2F2|SWAP70
GO:0002285	GO Biological Processes	lymphocyte activation involved in immune response	4	-2.46185	-0.511994	CD19|HLA-DMB|IL4R|SWAP70
GO:0002399	GO Biological Processes	MHC class II protein complex assembly	3	-7.42358	-5.0198	HLA-DMA|HLA-DMB|HLA-DRA
GO:0002503	GO Biological Processes	peptide antigen assembly with MHC class II protein complex	3	-7.42358	-5.0198	HLA-DMA|HLA-DMB|HLA-DRA
GO:0002501	GO Biological Processes	peptide antigen assembly with MHC protein complex	3	-6.42571	-4.09572	HLA-DMA|HLA-DMB|HLA-DRA
GO:0002396	GO Biological Processes	MHC protein complex assembly	3	-6.12575	-3.80912	HLA-DMA|HLA-DMB|HLA-DRA
GO:0050864	GO Biological Processes	regulation of B cell activation	8	-6.6686	-4.31537	ZFP36L1|CD19|CD74|MEF2C|PTPN6|SYK|MZB1|BANK1
GO:0002697	GO Biological Processes	regulation of immune effector process	10	-5.42968	-3.12602	CD19|CD74|CD55|FCER2|HLA-DMB|IL4R|ITGB2|PTPN6|SYK|MZB1
GO:0002699	GO Biological Processes	positive regulation of immune effector process	7	-5.00997	-2.72709	CD74|FCER2|HLA-DMB|IL4R|ITGB2|SYK|MZB1
GO:0045619	GO Biological Processes	regulation of lymphocyte differentiation	6	-4.61603	-2.34516	ZFP36L1|CD74|IL4R|PTPN6|SYK|CD83
GO:0046635	GO Biological Processes	positive regulation of alpha-beta T cell activation	4	-4.22742	-1.96823	CD55|IL4R|SYK|CD83
GO:0043302	GO Biological Processes	positive regulation of leukocyte degranulation	3	-4.13974	-1.88818	IL4R|ITGB2|SYK
GO:0045577	GO Biological Processes	regulation of B cell differentiation	3	-3.93486	-1.69815	ZFP36L1|PTPN6|SYK
GO:1902107	GO Biological Processes	positive regulation of leukocyte differentiation	5	-3.84965	-1.622	ZFP36L1|CD74|IL4R|SYK|CD83
GO:0002888	GO Biological Processes	positive regulation of myeloid leukocyte mediated immunity	3	-3.80066	-1.58182	IL4R|ITGB2|SYK
GO:0045582	GO Biological Processes	positive regulation of T cell differentiation	4	-3.73315	-1.52126	CD74|IL4R|SYK|CD83
GO:1903706	GO Biological Processes	regulation of hemopoiesis	8	-3.66467	-1.45962	ZFP36L1|CD74|IL4R|MEF2C|PRKCB|PTPN6|SYK|CD83
GO:0050730	GO Biological Processes	regulation of peptidyl-tyrosine phosphorylation	6	-3.62212	-1.42105	CD74|ITGB2|PTPN6|SYK|BANK1|NCF1
GO:0018108	GO Biological Processes	peptidyl-tyrosine phosphorylation	7	-3.61937	-1.42105	BLK|CD74|ITGB2|PTPN6|SYK|BANK1|NCF1
GO:2000516	GO Biological Processes	positive regulation of CD4-positive, alpha-beta T cell activation	3	-3.60501	-1.41985	CD55|IL4R|CD83
GO:0018212	GO Biological Processes	peptidyl-tyrosine modification	7	-3.59774	-1.41581	BLK|CD74|ITGB2|PTPN6|SYK|BANK1|NCF1
GO:0046634	GO Biological Processes	regulation of alpha-beta T cell activation	4	-3.54322	-1.37398	CD55|IL4R|SYK|CD83
GO:0045621	GO Biological Processes	positive regulation of lymphocyte differentiation	4	-3.52545	-1.36241	CD74|IL4R|SYK|CD83
GO:0042116	GO Biological Processes	macrophage activation	4	-3.50789	-1.35998	CD74|IL4R|ITGB2|SYK
GO:1902105	GO Biological Processes	regulation of leukocyte differentiation	6	-3.46434	-1.32234	ZFP36L1|CD74|IL4R|PTPN6|SYK|CD83
GO:1903708	GO Biological Processes	positive regulation of hemopoiesis	5	-3.34203	-1.21729	ZFP36L1|CD74|IL4R|SYK|CD83
GO:0046638	GO Biological Processes	positive regulation of alpha-beta T cell differentiation	3	-3.26046	-1.14274	IL4R|SYK|CD83
GO:0043300	GO Biological Processes	regulation of leukocyte degranulation	3	-3.20712	-1.09898	IL4R|ITGB2|SYK
GO:0002703	GO Biological Processes	regulation of leukocyte mediated immunity	5	-3.18115	-1.0784	FCER2|IL4R|ITGB2|PTPN6|SYK
GO:1903307	GO Biological Processes	positive regulation of regulated secretory pathway	3	-3.10704	-1.01489	IL4R|ITGB2|SYK
GO:0002886	GO Biological Processes	regulation of myeloid leukocyte mediated immunity	3	-2.9927	-0.928409	IL4R|ITGB2|SYK
GO:0032722	GO Biological Processes	positive regulation of chemokine production	3	-2.9927	-0.928409	CD74|IL4R|SYK
GO:0002705	GO Biological Processes	positive regulation of leukocyte mediated immunity	4	-2.9577	-0.898293	FCER2|IL4R|ITGB2|SYK
GO:2000514	GO Biological Processes	regulation of CD4-positive, alpha-beta T cell activation	3	-2.92903	-0.888611	CD55|IL4R|CD83
GO:0046631	GO Biological Processes	alpha-beta T cell activation	4	-2.89843	-0.860325	CD55|IL4R|SYK|CD83
GO:0046637	GO Biological Processes	regulation of alpha-beta T cell differentiation	3	-2.88842	-0.855631	IL4R|SYK|CD83
GO:0045580	GO Biological Processes	regulation of T cell differentiation	4	-2.88686	-0.855631	CD74|IL4R|SYK|CD83
GO:0030217	GO Biological Processes	T cell differentiation	5	-2.86619	-0.837225	ZFP36L1|CD74|IL4R|SYK|CD83
GO:0032675	GO Biological Processes	regulation of interleukin-6 production	4	-2.74436	-0.739593	CD74|PTPN6|SYK|BANK1
GO:0032635	GO Biological Processes	interleukin-6 production	4	-2.65345	-0.663692	CD74|PTPN6|SYK|BANK1
GO:1903305	GO Biological Processes	regulation of regulated secretory pathway	4	-2.63402	-0.652169	IL4R|ITGB2|PRKCB|SYK
GO:0043900	GO Biological Processes	regulation of multi-organism process	6	-2.58005	-0.608088	CD74|CD55|FCER2|SMARCB1|SYK|IFITM1
GO:0032642	GO Biological Processes	regulation of chemokine production	3	-2.56017	-0.592302	CD74|IL4R|SYK
GO:0045921	GO Biological Processes	positive regulation of exocytosis	3	-2.47339	-0.516571	IL4R|ITGB2|SYK
GO:0032602	GO Biological Processes	chemokine production	3	-2.45955	-0.511994	CD74|IL4R|SYK
GO:0035710	GO Biological Processes	CD4-positive, alpha-beta T cell activation	3	-2.41904	-0.481522	CD55|IL4R|CD83
GO:0043902	GO Biological Processes	positive regulation of multi-organism process	4	-2.41168	-0.478797	CD74|FCER2|SMARCB1|SYK
GO:0050731	GO Biological Processes	positive regulation of peptidyl-tyrosine phosphorylation	4	-2.37925	-0.45259	CD74|SYK|BANK1|NCF1
GO:0070371	GO Biological Processes	ERK1 and ERK2 cascade	5	-2.31679	-0.398979	ZFP36L1|CD74|CTSH|PTPN6|SYK
GO:0046632	GO Biological Processes	alpha-beta T cell differentiation	3	-2.30563	-0.396488	IL4R|SYK|CD83
GO:0030593	GO Biological Processes	neutrophil chemotaxis	3	-2.27027	-0.372983	CD74|ITGB2|SYK
GO:0007229	GO Biological Processes	integrin-mediated signaling pathway	3	-2.25873	-0.363113	FLNA|ITGB2|SYK
GO:0097529	GO Biological Processes	myeloid leukocyte migration	4	-2.22792	-0.337264	CD74|ITGB2|SYK|SWAP70
R-HSA-6785807	Reactome Gene Sets	Interleukin-4 and Interleukin-13 signaling	3	-2.22484	-0.33582	FCER2|IL4R|ITGB2
GO:0032388	GO Biological Processes	positive regulation of intracellular transport	4	-2.20665	-0.322524	FLNA|IL4R|ITGB2|SYK
GO:0017157	GO Biological Processes	regulation of exocytosis	4	-2.16513	-0.295344	IL4R|ITGB2|PRKCB|SYK
GO:0042035	GO Biological Processes	regulation of cytokine biosynthetic process	3	-2.16005	-0.293397	CD74|SYK|UBE2J1
GO:0030595	GO Biological Processes	leukocyte chemotaxis	4	-2.13817	-0.279224	CD74|ITGB2|SYK|SWAP70
GO:1990266	GO Biological Processes	neutrophil migration	3	-2.10889	-0.256022	CD74|ITGB2|SYK
GO:0042089	GO Biological Processes	cytokine biosynthetic process	3	-2.06965	-0.22426	CD74|SYK|UBE2J1
GO:0071621	GO Biological Processes	granulocyte chemotaxis	3	-2.06965	-0.22426	CD74|ITGB2|SYK
GO:0042107	GO Biological Processes	cytokine metabolic process	3	-2.06007	-0.217627	CD74|SYK|UBE2J1
GO:0042100	GO Biological Processes	B cell proliferation	6	-6.06141	-3.74914	CD19|MS4A1|CD74|CD79A|MEF2C|MZB1
GO:0030888	GO Biological Processes	regulation of B cell proliferation	3	-2.92903	-0.888611	CD74|MEF2C|MZB1
GO:0002702	GO Biological Processes	positive regulation of production of molecular mediator of immune response	3	-2.3672	-0.442326	CD74|IL4R|MZB1
R-HSA-202733	Reactome Gene Sets	Cell surface interactions at the vascular wall	6	-5.1167	-2.82563	CD74|GRB2|JCHAIN|ITGB2|PTPN6|VPREB3
R-HSA-109582	Reactome Gene Sets	Hemostasis	11	-5.09947	-2.81252	ATP2B1|CD74|FLNA|GNG7|GRB2|JCHAIN|ITGB2|PRKCB|PTPN6|SYK|VPREB3
hsa04650	KEGG Pathway	Natural killer cell mediated cytotoxicity	5	-4.04019	-1.79612	GRB2|ITGB2|PRKCB|PTPN6|SYK
R-HSA-76002	Reactome Gene Sets	Platelet activation, signaling and aggregation	6	-3.56816	-1.39261	FLNA|GNG7|GRB2|PRKCB|PTPN6|SYK
GO:0050900	GO Biological Processes	leukocyte migration	8	-3.52128	-1.36209	CD74|GRB2|JCHAIN|ITGB2|PTPN6|SYK|SWAP70|VPREB3
R-HSA-451927	Reactome Gene Sets	Interleukin-2 family signaling	3	-3.34518	-1.21761	GRB2|PTPN6|SYK
R-HSA-512988	Reactome Gene Sets	Interleukin-3, Interleukin-5 and GM-CSF signaling	3	-3.2335	-1.11989	GRB2|PTPN6|SYK
GO:0031295	GO Biological Processes	T cell costimulation	3	-3.03713	-0.95786	MAP3K8|GRB2|PTPN6
GO:0031294	GO Biological Processes	lymphocyte costimulation	3	-3.0147	-0.942991	MAP3K8|GRB2|PTPN6
GO:0070527	GO Biological Processes	platelet aggregation	3	-2.94988	-0.892886	FLNA|PTPN6|SYK
GO:0030168	GO Biological Processes	platelet activation	4	-2.72364	-0.721013	FLNA|PRKCB|PTPN6|SYK
GO:0034109	GO Biological Processes	homotypic cell-cell adhesion	3	-2.56017	-0.592302	FLNA|PTPN6|SYK
R-HSA-2029480	Reactome Gene Sets	Fcgamma receptor (FCGR) dependent phagocytosis	3	-2.50158	-0.53957	GRB2|SYK|PLPP5
hsa05203	KEGG Pathway	Viral carcinogenesis	4	-2.30901	-0.396488	GRB2|REL|SP100|SYK
hsa05205	KEGG Pathway	Proteoglycans in cancer	4	-2.29389	-0.389695	FLNA|GRB2|PRKCB|PTPN6
GO:2000379	GO Biological Processes	positive regulation of reactive oxygen species metabolic process	3	-2.29372	-0.389695	GRB2|ITGB2|SYK
hsa04660	KEGG Pathway	T cell receptor signaling pathway	3	-2.28193	-0.379978	MAP3K8|GRB2|PTPN6
GO:0031623	GO Biological Processes	receptor internalization	3	-2.18122	-0.306709	GRB2|ITGB2|SYK
R-HSA-1500931	Reactome Gene Sets	Cell-Cell communication	3	-2.01339	-0.176802	FLNA|GRB2|PTPN6
GO:0043269	GO Biological Processes	regulation of ion transport	7	-2.01014	-0.175	ATP2B1|CD19|FLNA|MEF2C|PTPN6|SYK|HVCN1
GO:0050854	GO Biological Processes	regulation of antigen receptor-mediated signaling pathway	4	-4.14667	-1.89132	BLK|CD19|PRKCB|PTPN6
GO:0050855	GO Biological Processes	regulation of B cell receptor signaling pathway	3	-3.8885	-1.65542	BLK|CD19|PRKCB
GO:0006874	GO Biological Processes	cellular calcium ion homeostasis	8	-3.77802	-1.56267	ATP2B1|CD19|MS4A1|CD55|PRKCB|PTPN6|HERPUD1|SWAP70
GO:0055074	GO Biological Processes	calcium ion homeostasis	8	-3.69563	-1.48718	ATP2B1|CD19|MS4A1|CD55|PRKCB|PTPN6|HERPUD1|SWAP70
GO:0072503	GO Biological Processes	cellular divalent inorganic cation homeostasis	8	-3.56223	-1.38985	ATP2B1|CD19|MS4A1|CD55|PRKCB|PTPN6|HERPUD1|SWAP70
GO:0072507	GO Biological Processes	divalent inorganic cation homeostasis	8	-3.44704	-1.31087	ATP2B1|CD19|MS4A1|CD55|PRKCB|PTPN6|HERPUD1|SWAP70
GO:0006875	GO Biological Processes	cellular metal ion homeostasis	8	-3.10268	-1.01314	ATP2B1|CD19|MS4A1|CD55|PRKCB|PTPN6|HERPUD1|SWAP70
GO:0051480	GO Biological Processes	regulation of cytosolic calcium ion concentration	6	-2.85964	-0.832937	ATP2B1|CD19|MS4A1|CD55|PTPN6|SWAP70
GO:0030003	GO Biological Processes	cellular cation homeostasis	8	-2.77473	-0.760986	ATP2B1|CD19|MS4A1|CD55|PRKCB|PTPN6|HERPUD1|SWAP70
GO:0055065	GO Biological Processes	metal ion homeostasis	8	-2.77056	-0.759332	ATP2B1|CD19|MS4A1|CD55|PRKCB|PTPN6|HERPUD1|SWAP70
GO:0006873	GO Biological Processes	cellular ion homeostasis	8	-2.72123	-0.720724	ATP2B1|CD19|MS4A1|CD55|PRKCB|PTPN6|HERPUD1|SWAP70
GO:0055080	GO Biological Processes	cation homeostasis	8	-2.47281	-0.516571	ATP2B1|CD19|MS4A1|CD55|PRKCB|PTPN6|HERPUD1|SWAP70
GO:0098771	GO Biological Processes	inorganic ion homeostasis	8	-2.43365	-0.491185	ATP2B1|CD19|MS4A1|CD55|PRKCB|PTPN6|HERPUD1|SWAP70
GO:0007204	GO Biological Processes	positive regulation of cytosolic calcium ion concentration	5	-2.33383	-0.410735	CD19|MS4A1|CD55|PTPN6|SWAP70
GO:0033627	GO Biological Processes	cell adhesion mediated by integrin	4	-4.06981	-1.82201	ITGB2|PTPN6|SYK|SWAP70
GO:0002366	GO Biological Processes	leukocyte activation involved in immune response	10	-3.8479	-1.622	CD19|CTSH|CD55|HLA-DMB|IL4R|ITGB2|PTPN6|SYK|SWAP70|HVCN1
GO:0002263	GO Biological Processes	cell activation involved in immune response	10	-3.82806	-1.60571	CD19|CTSH|CD55|HLA-DMB|IL4R|ITGB2|PTPN6|SYK|SWAP70|HVCN1
GO:0001906	GO Biological Processes	cell killing	5	-3.51902	-1.36209	CTSH|CD55|FCER2|PTPN6|SYK
GO:0045055	GO Biological Processes	regulated exocytosis	10	-3.44987	-1.31087	CTSH|CD55|FLNA|IL4R|ITGB2|PRKCB|PTPN6|SYK|SYNGR2|HVCN1
GO:0033628	GO Biological Processes	regulation of cell adhesion mediated by integrin	3	-3.28805	-1.16612	PTPN6|SYK|SWAP70
GO:0002920	GO Biological Processes	regulation of humoral immune response	4	-2.9337	-0.888612	CD19|CD55|FCER2|PTPN6
GO:0002274	GO Biological Processes	myeloid leukocyte activation	8	-2.77473	-0.760986	CD74|CTSH|CD55|IL4R|ITGB2|PTPN6|SYK|HVCN1
GO:0002455	GO Biological Processes	humoral immune response mediated by circulating immunoglobulin	4	-2.76538	-0.756313	CD55|FCER2|HLA-DQB1|PTPN6
GO:0043299	GO Biological Processes	leukocyte degranulation	7	-2.63692	-0.653036	CTSH|CD55|IL4R|ITGB2|PTPN6|SYK|HVCN1
GO:0002275	GO Biological Processes	myeloid cell activation involved in immune response	7	-2.59214	-0.614329	CTSH|CD55|IL4R|ITGB2|PTPN6|SYK|HVCN1
GO:0002444	GO Biological Processes	myeloid leukocyte mediated immunity	7	-2.55705	-0.591146	CTSH|CD55|IL4R|ITGB2|PTPN6|SYK|HVCN1
GO:0031341	GO Biological Processes	regulation of cell killing	3	-2.30563	-0.396488	CD55|FCER2|SYK
GO:0043312	GO Biological Processes	neutrophil degranulation	6	-2.20666	-0.322524	CTSH|CD55|ITGB2|PTPN6|SYK|HVCN1
GO:0002283	GO Biological Processes	neutrophil activation involved in immune response	6	-2.19401	-0.314268	CTSH|CD55|ITGB2|PTPN6|SYK|HVCN1
GO:0042119	GO Biological Processes	neutrophil activation	6	-2.15255	-0.288997	CTSH|CD55|ITGB2|PTPN6|SYK|HVCN1
GO:0002446	GO Biological Processes	neutrophil mediated immunity	6	-2.14847	-0.286453	CTSH|CD55|ITGB2|PTPN6|SYK|HVCN1
GO:0036230	GO Biological Processes	granulocyte activation	6	-2.13222	-0.274803	CTSH|CD55|ITGB2|PTPN6|SYK|HVCN1
GO:0032869	GO Biological Processes	cellular response to insulin stimulus	6	-4.001	-1.76062	PARP1|ATP2B1|ZFP36L1|GRB2|PRKCB|MZB1
GO:0032868	GO Biological Processes	response to insulin	6	-3.46434	-1.32234	PARP1|ATP2B1|ZFP36L1|GRB2|PRKCB|MZB1
GO:0032870	GO Biological Processes	cellular response to hormone stimulus	9	-3.20224	-1.0968	PARP1|ATP2B1|ZFP36L1|CTSH|GRB2|MEF2C|PRKCB|NCOA3|MZB1
GO:0071375	GO Biological Processes	cellular response to peptide hormone stimulus	6	-3.08903	-1.00207	PARP1|ATP2B1|ZFP36L1|GRB2|PRKCB|MZB1
GO:1901653	GO Biological Processes	cellular response to peptide	6	-2.67778	-0.681486	PARP1|ATP2B1|ZFP36L1|GRB2|PRKCB|MZB1
GO:1900076	GO Biological Processes	regulation of cellular response to insulin stimulus	3	-2.67055	-0.676355	ATP2B1|PRKCB|MZB1
hsa04062	KEGG Pathway	Chemokine signaling pathway	4	-2.46185	-0.511994	GNG7|GRB2|PRKCB|NCF1
GO:0043434	GO Biological Processes	response to peptide hormone	6	-2.42356	-0.484211	PARP1|ATP2B1|ZFP36L1|GRB2|PRKCB|MZB1
GO:0071417	GO Biological Processes	cellular response to organonitrogen compound	7	-2.41085	-0.478797	PARP1|ATP2B1|ZFP36L1|GRB2|MEF2C|PRKCB|MZB1
hsa04064	KEGG Pathway	NF-kappa B signaling pathway	3	-2.37993	-0.45259	PARP1|PRKCB|SYK
GO:1901699	GO Biological Processes	cellular response to nitrogen compound	7	-2.17415	-0.301225	PARP1|ATP2B1|ZFP36L1|GRB2|MEF2C|PRKCB|MZB1
hsa04014	KEGG Pathway	Ras signaling pathway	4	-2.1249	-0.269001	GNG7|GRB2|PRKCB|REL
GO:1901652	GO Biological Processes	response to peptide	6	-2.05342	-0.212447	PARP1|ATP2B1|ZFP36L1|GRB2|PRKCB|MZB1
GO:0030224	GO Biological Processes	monocyte differentiation	3	-3.60501	-1.41985	ZFP36L1|CD74|MEF2C
GO:1903131	GO Biological Processes	mononuclear cell differentiation	3	-3.60501	-1.41985	ZFP36L1|CD74|MEF2C
GO:0030099	GO Biological Processes	myeloid cell differentiation	7	-3.2591	-1.14274	PARP1|ZFP36L1|CD74|IRF8|MEF2C|PRKCB|PTPN6
GO:0071214	GO Biological Processes	cellular response to abiotic stimulus	6	-3.02059	-0.946378	PARP1|ZFP36L1|GRB2|HVCN1|RCSD1|MTPN
GO:0104004	GO Biological Processes	cellular response to environmental stimulus	6	-3.02059	-0.946378	PARP1|ZFP36L1|GRB2|HVCN1|RCSD1|MTPN
GO:0071248	GO Biological Processes	cellular response to metal ion	4	-2.39537	-0.465123	PARP1|MEF2C|HVCN1|NCF1
GO:0071396	GO Biological Processes	cellular response to lipid	7	-2.3284	-0.407076	PARP1|ATP2B1|ZFP36L1|CD55|IRF8|MEF2C|NCOA3
GO:0003012	GO Biological Processes	muscle system process	6	-2.29808	-0.390652	PARP1|ATP2B1|FLNA|MEF2C|RCSD1|MTPN
GO:0002573	GO Biological Processes	myeloid leukocyte differentiation	4	-2.27894	-0.379978	PARP1|ZFP36L1|CD74|MEF2C
GO:0003300	GO Biological Processes	cardiac muscle hypertrophy	3	-2.24732	-0.353357	PARP1|MEF2C|MTPN
GO:0014897	GO Biological Processes	striated muscle hypertrophy	3	-2.21377	-0.326387	PARP1|MEF2C|MTPN
GO:0071241	GO Biological Processes	cellular response to inorganic substance	4	-2.19266	-0.314268	PARP1|MEF2C|HVCN1|NCF1
GO:0014896	GO Biological Processes	muscle hypertrophy	3	-2.19196	-0.314268	PARP1|MEF2C|MTPN
GO:0043500	GO Biological Processes	muscle adaptation	3	-2.07933	-0.23096	PARP1|MEF2C|MTPN
GO:0042554	GO Biological Processes	superoxide anion generation	3	-3.60501	-1.41985	ITGB2|SYK|NCF1
GO:0045730	GO Biological Processes	respiratory burst	3	-3.56935	-1.39261	CD55|JCHAIN|NCF1
GO:0006801	GO Biological Processes	superoxide metabolic process	3	-2.70414	-0.705748	ITGB2|SYK|NCF1
hsa04666	KEGG Pathway	Fc gamma R-mediated phagocytosis	3	-2.43238	-0.491185	PRKCB|SYK|NCF1
hsa04670	KEGG Pathway	Leukocyte transendothelial migration	3	-2.16005	-0.293397	ITGB2|PRKCB|NCF1
hsa04380	KEGG Pathway	Osteoclast differentiation	3	-2.0043	-0.170606	GRB2|SYK|NCF1
R-HSA-449147	Reactome Gene Sets	Signaling by Interleukins	9	-3.52658	-1.36241	MAP3K8|FCER2|GRB2|IL4R|ITGB2|MEF2C|PTPN6|SYK|IL32
GO:0002822	GO Biological Processes	regulation of adaptive immune response based on somatic recombination of immune receptors built from	4	-2.81933	-0.797099	FCER2|IL4R|MEF2C|PTPN6
GO:0051250	GO Biological Processes	negative regulation of lymphocyte activation	4	-2.80837	-0.788367	CD74|IL4R|PTPN6|BANK1
GO:0002819	GO Biological Processes	regulation of adaptive immune response	4	-2.66326	-0.671147	FCER2|IL4R|MEF2C|PTPN6
GO:0002695	GO Biological Processes	negative regulation of leukocyte activation	4	-2.52281	-0.558852	CD74|IL4R|PTPN6|BANK1
GO:0022408	GO Biological Processes	negative regulation of cell-cell adhesion	4	-2.47039	-0.516067	CD74|IL4R|PTPN6|SWAP70
GO:0050866	GO Biological Processes	negative regulation of cell activation	4	-2.3243	-0.404733	CD74|IL4R|PTPN6|BANK1
GO:0002683	GO Biological Processes	negative regulation of immune system process	6	-2.30706	-0.396488	ZFP36L1|CD74|CD55|IL4R|PTPN6|BANK1
GO:0050868	GO Biological Processes	negative regulation of T cell activation	3	-2.18122	-0.306709	CD74|IL4R|PTPN6
GO:0002698	GO Biological Processes	negative regulation of immune effector process	3	-2.09895	-0.247582	CD55|IL4R|PTPN6
GO:1903038	GO Biological Processes	negative regulation of leukocyte cell-cell adhesion	3	-2.01339	-0.176802	CD74|IL4R|PTPN6
GO:0060337	GO Biological Processes	type I interferon signaling pathway	4	-3.50789	-1.35998	IRF8|PTPN6|SP100|IFITM1
GO:0071357	GO Biological Processes	cellular response to type I interferon	4	-3.50789	-1.35998	IRF8|PTPN6|SP100|IFITM1
GO:0034340	GO Biological Processes	response to type I interferon	4	-3.43957	-1.30628	IRF8|PTPN6|SP100|IFITM1
R-HSA-909733	Reactome Gene Sets	Interferon alpha/beta signaling	3	-2.7744	-0.760986	IRF8|PTPN6|IFITM1
GO:0043123	GO Biological Processes	positive regulation of I-kappaB kinase/NF-kappaB signaling	5	-3.39547	-1.26505	CD74|FLNA|PRKCB|REL|S100A4
GO:0043122	GO Biological Processes	regulation of I-kappaB kinase/NF-kappaB signaling	5	-2.8903	-0.855631	CD74|FLNA|PRKCB|REL|S100A4
GO:0007249	GO Biological Processes	I-kappaB kinase/NF-kappaB signaling	5	-2.64962	-0.663692	CD74|FLNA|PRKCB|REL|S100A4
GO:0032386	GO Biological Processes	regulation of intracellular transport	7	-3.21648	-1.10562	FLNA|IL4R|ITGB2|PRKCB|SP100|SYK|UBE2J1
GO:0051090	GO Biological Processes	regulation of DNA-binding transcription factor activity	7	-3.1747	-1.07462	FLNA|ITGB2|PRKCB|SMARCB1|SP100|SYK|MTPN
GO:0090087	GO Biological Processes	regulation of peptide transport	9	-3.08195	-0.997577	BLK|CD74|FLNA|IL4R|ITGB2|SP100|SYK|UBE2J1|BANK1
GO:0051223	GO Biological Processes	regulation of protein transport	8	-2.5837	-0.608088	BLK|FLNA|IL4R|ITGB2|SP100|SYK|UBE2J1|BANK1
GO:0070201	GO Biological Processes	regulation of establishment of protein localization	8	-2.41262	-0.478797	BLK|FLNA|IL4R|ITGB2|SP100|SYK|UBE2J1|BANK1
GO:0033157	GO Biological Processes	regulation of intracellular protein transport	4	-2.13817	-0.279224	FLNA|ITGB2|SP100|UBE2J1
GO:0051259	GO Biological Processes	protein complex oligomerization	8	-3.16157	-1.06416	MS4A1|CD74|CD79A|CD79B|GRB2|JCHAIN|SNX2|TCL1A
hsa04151	KEGG Pathway	PI3K-Akt signaling pathway	6	-2.96105	-0.899205	CD19|GNG7|GRB2|IL4R|SYK|TCL1A
GO:0031334	GO Biological Processes	positive regulation of protein complex assembly	5	-2.64962	-0.663692	PARP1|GRB2|JCHAIN|SYK|TCL1A
GO:0044089	GO Biological Processes	positive regulation of cellular component biogenesis	7	-2.6144	-0.634574	PARP1|FLNA|GRB2|JCHAIN|SYK|TCL1A|SWAP70
GO:0043254	GO Biological Processes	regulation of protein complex assembly	6	-2.28027	-0.379978	PARP1|GRB2|JCHAIN|SYK|TCL1A|MTPN
GO:0060249	GO Biological Processes	anatomical structure homeostasis	7	-3.14534	-1.05057	PARP1|ATP2B1|CTSH|JCHAIN|SP100|SYK|POLD4
GO:0030260	GO Biological Processes	entry into host cell	4	-2.9337	-0.888612	CD74|CD55|GRB2|IFITM1
GO:0044409	GO Biological Processes	entry into host	4	-2.9337	-0.888612	CD74|CD55|GRB2|IFITM1
GO:0051806	GO Biological Processes	entry into cell of other organism involved in symbiotic interaction	4	-2.9337	-0.888612	CD74|CD55|GRB2|IFITM1
GO:0051828	GO Biological Processes	entry into other organism involved in symbiotic interaction	4	-2.9337	-0.888612	CD74|CD55|GRB2|IFITM1
GO:0051701	GO Biological Processes	interaction with host	4	-2.2423	-0.349991	CD74|CD55|GRB2|IFITM1
GO:0046718	GO Biological Processes	viral entry into host cell	3	-2.07933	-0.23096	CD74|CD55|IFITM1
GO:0032729	GO Biological Processes	positive regulation of interferon-gamma production	3	-2.84916	-0.824704	HLA-DPA1|HLA-DPB1|IRF8
GO:0032649	GO Biological Processes	regulation of interferon-gamma production	3	-2.30563	-0.396488	HLA-DPA1|HLA-DPB1|IRF8
GO:0032609	GO Biological Processes	interferon-gamma production	3	-2.17059	-0.299233	HLA-DPA1|HLA-DPB1|IRF8
hsa04010	KEGG Pathway	MAPK signaling pathway	5	-2.7506	-0.743686	MAP3K8|FLNA|GRB2|MEF2C|PRKCB
GO:0032956	GO Biological Processes	regulation of actin cytoskeleton organization	5	-2.19741	-0.314901	FLNA|GRB2|MEF2C|SWAP70|MTPN
GO:1902903	GO Biological Processes	regulation of supramolecular fiber organization	5	-2.15628	-0.291181	FLNA|GRB2|MEF2C|SWAP70|MTPN
GO:0030036	GO Biological Processes	actin cytoskeleton organization	7	-2.12223	-0.267848	FLNA|GRB2|MEF2C|PDLIM1|MTSS1|SWAP70|MTPN
GO:0009617	GO Biological Processes	response to bacterium	8	-2.57991	-0.608088	MS4A1|CD79B|CD55|IRF8|JCHAIN|MEF2C|SYK|BANK1
GO:0071216	GO Biological Processes	cellular response to biotic stimulus	4	-2.06683	-0.222918	CD55|IRF8|MEF2C|SYK
R-HSA-418346	Reactome Gene Sets	Platelet homeostasis	3	-2.47339	-0.516571	ATP2B1|GNG7|PTPN6
GO:0001818	GO Biological Processes	negative regulation of cytokine production	5	-2.45877	-0.511994	ATP2B1|PTPN6|REL|CD83|BANK1
GO:0045778	GO Biological Processes	positive regulation of ossification	3	-2.44588	-0.500978	ATP2B1|MEF2C|IFITM1
R-HSA-166016	Reactome Gene Sets	Toll Like Receptor 4 (TLR4) Cascade	3	-2.01339	-0.176802	MAP3K8|ITGB2|MEF2C

## Sheet: CD8+ T cell
GO	Category	Description	counts	LogP	Log(q-value)	Gene list
R-HSA-1280218	Reactome Gene Sets	Adaptive Immune System	25	-13.6224	-9.5624	CD3D|CD3G|CD8A|CD8B|CD74|CTSC|CYBA|FCGR3A|FYN|HLA-C|HLA-DRA|ITGAL|ITGB1|ITGB2|KLRD1|CD99|NFATC3|PPP2R5C|RAP1B|TAP1|ZAP70|KLRG1|HCST|BTN3A2|RNF213
R-HSA-198933	Reactome Gene Sets	Immunoregulatory interactions between a Lymphoid and a non-Lymphoid cell	13	-13.091	-9.25588	CD3D|CD3G|CD8A|CD8B|FCGR3A|HLA-C|ITGAL|ITGB1|ITGB2|KLRD1|CD99|KLRG1|HCST
hsa05166	KEGG Pathway	HTLV-I infection	9	-5.34948	-2.82961	CD3D|CD3G|HLA-C|HLA-DRA|IL2RB|ITGAL|ITGB2|NFATC3|TLN1
R-HSA-109582	Reactome Gene Sets	Hemostasis	23	-13.5736	-9.5624	ACTN4|ATP2B4|CD2|CD63|CD74|CTSW|FLNA|FYN|ITGAL|ITGB1|ITGB2|CD99|PFN1|PLEK|PPP2R5C|SRGN|PRKCH|RAP1B|SPN|TLN1|DOK2|FAM49B|GNG2
R-HSA-76002	Reactome Gene Sets	Platelet activation, signaling and aggregation	13	-9.31383	-5.90465	ACTN4|CD63|CTSW|FLNA|FYN|PFN1|PLEK|SRGN|PRKCH|RAP1B|TLN1|FAM49B|GNG2
R-HSA-114608	Reactome Gene Sets	Platelet degranulation	9	-7.8683	-4.66998	ACTN4|CD63|CTSW|FLNA|PFN1|PLEK|SRGN|TLN1|FAM49B
R-HSA-76005	Reactome Gene Sets	Response to elevated platelet cytosolic Ca2+	9	-7.72369	-4.61555	ACTN4|CD63|CTSW|FLNA|PFN1|PLEK|SRGN|TLN1|FAM49B
GO:0034109	GO Biological Processes	homotypic cell-cell adhesion	7	-6.83277	-3.98291	CLIC1|FLNA|LGALS1|CD99|PLEK|CCL5|TLN1
GO:0002576	GO Biological Processes	platelet degranulation	8	-6.6784	-3.86504	ACTN4|CD63|CTSW|FLNA|PLEK|SRGN|TLN1|FAM49B
GO:0045055	GO Biological Processes	regulated exocytosis	15	-5.15175	-2.6524	ACTN4|CD63|CTSC|CTSW|CYBA|STOM|FLNA|ITGAL|ITGB2|PLEK|SRGN|RAP1B|STK10|TLN1|FAM49B
GO:0030168	GO Biological Processes	platelet activation	7	-4.98709	-2.5009	CLIC1|FLNA|FYN|PLEK|PRKCH|TLN1|GNG2
GO:0070527	GO Biological Processes	platelet aggregation	4	-3.68447	-1.4828	CLIC1|FLNA|PLEK|TLN1
GO:0007596	GO Biological Processes	blood coagulation	7	-2.88833	-0.889934	CLIC1|FLNA|FYN|PLEK|PRKCH|TLN1|GNG2
GO:0007599	GO Biological Processes	hemostasis	7	-2.85172	-0.861679	CLIC1|FLNA|FYN|PLEK|PRKCH|TLN1|GNG2
GO:0050817	GO Biological Processes	coagulation	7	-2.84448	-0.856501	CLIC1|FLNA|FYN|PLEK|PRKCH|TLN1|GNG2
GO:0050878	GO Biological Processes	regulation of body fluid levels	8	-2.49629	-0.613415	CLIC1|CYBA|FLNA|FYN|PLEK|PRKCH|TLN1|GNG2
GO:0009611	GO Biological Processes	response to wounding	9	-2.22301	-0.425652	CLIC1|FLNA|FYN|LCP1|LGALS1|PLEK|PRKCH|TLN1|GNG2
GO:0042060	GO Biological Processes	wound healing	8	-2.19289	-0.408776	CLIC1|FLNA|FYN|LCP1|PLEK|PRKCH|TLN1|GNG2
GO:0034329	GO Biological Processes	cell junction assembly	5	-2.19172	-0.408776	ACTN4|FLNA|PRKCH|RAP1B|TLN1
GO:0042110	GO Biological Processes	T cell activation	19	-11.9521	-8.24191	RUNX3|CD2|CD3D|CD3G|CD8A|CD8B|CD74|FYN|IL7R|ITGAL|LCP1|LGALS1|RORA|CCL5|SPN|ZAP70|RAB29|FAM49B|SASH3
GO:0046649	GO Biological Processes	lymphocyte activation	22	-11.1377	-7.52444	RUNX3|CD2|CD3D|CD3G|CD8A|CD8B|CD74|FYN|IL7R|ITGAL|ITGB1|ITGB2|LCP1|LGALS1|PRF1|RORA|CCL5|SPN|ZAP70|RAB29|FAM49B|SASH3
GO:0007159	GO Biological Processes	leukocyte cell-cell adhesion	14	-8.99143	-5.67916	RUNX3|CD74|FYN|IL7R|ITGAL|ITGB1|ITGB2|LGALS1|CCL5|SPN|STK10|ZAP70|FAM49B|SASH3
GO:0030098	GO Biological Processes	lymphocyte differentiation	13	-7.75555	-4.61938	RUNX3|CD2|CD3D|CD3G|CD8A|CD74|IL7R|ITGB1|LGALS1|RORA|SPN|ZAP70|SASH3
GO:0030217	GO Biological Processes	T cell differentiation	11	-7.59388	-4.60384	RUNX3|CD2|CD3D|CD3G|CD8A|CD74|IL7R|RORA|SPN|ZAP70|SASH3
GO:0050865	GO Biological Processes	regulation of cell activation	16	-7.30009	-4.34851	RUNX3|CD2|CD74|CTSC|FYN|IL7R|ITGB2|LGALS1|PLEK|RORA|CCL5|SPN|ZAP70|CST7|FAM49B|SASH3
GO:0050867	GO Biological Processes	positive regulation of cell activation	13	-7.19673	-4.26468	RUNX3|CD2|CD74|CTSC|FYN|IL7R|ITGB2|LGALS1|PLEK|CCL5|ZAP70|FAM49B|SASH3
GO:0022407	GO Biological Processes	regulation of cell-cell adhesion	13	-7.05815	-4.14383	RUNX3|CD74|FYN|IL7R|ITGB2|LGALS1|MBP|CCL5|SPN|ZAP70|FAM49B|SASH3|AKNA
GO:1903039	GO Biological Processes	positive regulation of leukocyte cell-cell adhesion	10	-6.95009	-4.06919	RUNX3|CD74|FYN|IL7R|ITGB2|LGALS1|CCL5|ZAP70|FAM49B|SASH3
GO:0002694	GO Biological Processes	regulation of leukocyte activation	15	-6.9098	-4.04469	RUNX3|CD2|CD74|CTSC|FYN|IL7R|ITGB2|LGALS1|RORA|CCL5|SPN|ZAP70|CST7|FAM49B|SASH3
GO:0002521	GO Biological Processes	leukocyte differentiation	14	-6.67215	-3.86504	RUNX3|CD2|CD3D|CD3G|CD8A|CD74|IL7R|ITGB1|JUNB|LGALS1|RORA|SPN|ZAP70|SASH3
GO:0030155	GO Biological Processes	regulation of cell adhesion	16	-6.61569	-3.82194	ACTN4|RUNX3|CD74|FLNA|FYN|IL7R|ITGB2|LGALS1|MBP|CCL5|SPN|ZAP70|ADGRG1|FAM49B|SASH3|AKNA
GO:1903037	GO Biological Processes	regulation of leukocyte cell-cell adhesion	11	-6.55538	-3.7746	RUNX3|CD74|FYN|IL7R|ITGB2|LGALS1|CCL5|SPN|ZAP70|FAM49B|SASH3
GO:0002696	GO Biological Processes	positive regulation of leukocyte activation	12	-6.47362	-3.71766	RUNX3|CD2|CD74|CTSC|FYN|IL7R|ITGB2|LGALS1|CCL5|ZAP70|FAM49B|SASH3
GO:0050863	GO Biological Processes	regulation of T cell activation	11	-6.41576	-3.68328	RUNX3|CD2|CD74|FYN|IL7R|LGALS1|CCL5|SPN|ZAP70|FAM49B|SASH3
GO:0022409	GO Biological Processes	positive regulation of cell-cell adhesion	10	-6.32077	-3.63176	RUNX3|CD74|FYN|IL7R|ITGB2|LGALS1|CCL5|ZAP70|FAM49B|SASH3
GO:0045785	GO Biological Processes	positive regulation of cell adhesion	12	-6.20333	-3.53872	RUNX3|CD74|FLNA|FYN|IL7R|ITGB2|LGALS1|CCL5|ZAP70|ADGRG1|FAM49B|SASH3
GO:0050870	GO Biological Processes	positive regulation of T cell activation	9	-6.19777	-3.53872	RUNX3|CD74|FYN|IL7R|LGALS1|CCL5|ZAP70|FAM49B|SASH3
GO:0051249	GO Biological Processes	regulation of lymphocyte activation	11	-4.61167	-2.2025	RUNX3|CD2|CD74|FYN|IL7R|LGALS1|CCL5|SPN|ZAP70|FAM49B|SASH3
GO:0051251	GO Biological Processes	positive regulation of lymphocyte activation	9	-4.4317	-2.06392	RUNX3|CD74|FYN|IL7R|LGALS1|CCL5|ZAP70|FAM49B|SASH3
GO:0045582	GO Biological Processes	positive regulation of T cell differentiation	5	-4.27939	-1.93561	RUNX3|CD74|IL7R|ZAP70|SASH3
GO:0045580	GO Biological Processes	regulation of T cell differentiation	6	-4.21924	-1.89375	RUNX3|CD2|CD74|IL7R|ZAP70|SASH3
GO:1902107	GO Biological Processes	positive regulation of leukocyte differentiation	6	-4.10082	-1.79939	RUNX3|CD74|IL7R|LGALS1|ZAP70|SASH3
GO:0045621	GO Biological Processes	positive regulation of lymphocyte differentiation	5	-4.02118	-1.72595	RUNX3|CD74|IL7R|ZAP70|SASH3
GO:0046632	GO Biological Processes	alpha-beta T cell differentiation	5	-3.87359	-1.61441	RUNX3|RORA|SPN|ZAP70|SASH3
GO:0045619	GO Biological Processes	regulation of lymphocyte differentiation	6	-3.75252	-1.54063	RUNX3|CD2|CD74|IL7R|ZAP70|SASH3
GO:1903708	GO Biological Processes	positive regulation of hemopoiesis	6	-3.5032	-1.34322	RUNX3|CD74|IL7R|LGALS1|ZAP70|SASH3
GO:0046651	GO Biological Processes	lymphocyte proliferation	7	-3.41568	-1.28526	CD74|FYN|IL7R|CCL5|SPN|ZAP70|SASH3
GO:1902105	GO Biological Processes	regulation of leukocyte differentiation	7	-3.41568	-1.28526	RUNX3|CD2|CD74|IL7R|LGALS1|ZAP70|SASH3
GO:0032943	GO Biological Processes	mononuclear cell proliferation	7	-3.39676	-1.27291	CD74|FYN|IL7R|CCL5|SPN|ZAP70|SASH3
GO:0043367	GO Biological Processes	CD4-positive, alpha-beta T cell differentiation	4	-3.33425	-1.22339	RUNX3|RORA|SPN|SASH3
GO:0046631	GO Biological Processes	alpha-beta T cell activation	5	-3.24561	-1.15607	RUNX3|RORA|SPN|ZAP70|SASH3
GO:0070661	GO Biological Processes	leukocyte proliferation	7	-3.18181	-1.10255	CD74|FYN|IL7R|CCL5|SPN|ZAP70|SASH3
GO:0035710	GO Biological Processes	CD4-positive, alpha-beta T cell activation	4	-2.97796	-0.948995	RUNX3|RORA|SPN|SASH3
GO:0046638	GO Biological Processes	positive regulation of alpha-beta T cell differentiation	3	-2.81317	-0.841356	RUNX3|ZAP70|SASH3
GO:0042098	GO Biological Processes	T cell proliferation	5	-2.66883	-0.740379	FYN|CCL5|SPN|ZAP70|SASH3
GO:0046635	GO Biological Processes	positive regulation of alpha-beta T cell activation	3	-2.46822	-0.590531	RUNX3|ZAP70|SASH3
GO:0050670	GO Biological Processes	regulation of lymphocyte proliferation	5	-2.45995	-0.587024	CD74|CCL5|SPN|ZAP70|SASH3
GO:0032944	GO Biological Processes	regulation of mononuclear cell proliferation	5	-2.45109	-0.579737	CD74|CCL5|SPN|ZAP70|SASH3
GO:0046637	GO Biological Processes	regulation of alpha-beta T cell differentiation	3	-2.44856	-0.578774	RUNX3|ZAP70|SASH3
GO:0050671	GO Biological Processes	positive regulation of lymphocyte proliferation	4	-2.4299	-0.567599	CD74|CCL5|ZAP70|SASH3
GO:0032946	GO Biological Processes	positive regulation of mononuclear cell proliferation	4	-2.41803	-0.55909	CD74|CCL5|ZAP70|SASH3
GO:0042113	GO Biological Processes	B cell activation	6	-2.39243	-0.54107	CD74|IL7R|ITGB1|LGALS1|ZAP70|SASH3
GO:0070663	GO Biological Processes	regulation of leukocyte proliferation	5	-2.34028	-0.506589	CD74|CCL5|SPN|ZAP70|SASH3
GO:0070665	GO Biological Processes	positive regulation of leukocyte proliferation	4	-2.3267	-0.498736	CD74|CCL5|ZAP70|SASH3
GO:0042129	GO Biological Processes	regulation of T cell proliferation	4	-2.15134	-0.37941	CCL5|SPN|ZAP70|SASH3
GO:1903706	GO Biological Processes	regulation of hemopoiesis	7	-2.06312	-0.311962	RUNX3|CD2|CD74|IL7R|LGALS1|ZAP70|SASH3
GO:0018212	GO Biological Processes	peptidyl-tyrosine modification	6	-2.04509	-0.300974	CD74|FYN|ITGB2|CCL5|ZAP70|TPST2
GO:0002250	GO Biological Processes	adaptive immune response	20	-10.0211	-6.48697	CD3D|CD3G|CD8A|CD8B|CD74|CTSC|FYN|GZMM|HLA-C|HLA-DRA|IL7R|PRF1|RORA|SPN|TAP1|ZAP70|BTN3A2|FAM49B|SASH3|MYO1G
GO:0002456	GO Biological Processes	T cell mediated immunity	10	-9.90303	-6.43586	CD8A|CTSC|GZMM|HLA-C|IL7R|PRF1|BTN3A2|FAM49B|SASH3|MYO1G
GO:0002449	GO Biological Processes	lymphocyte mediated immunity	13	-7.75555	-4.61938	CD8A|CD74|CTSC|GZMB|GZMM|HLA-C|IL7R|KLRD1|PRF1|BTN3A2|FAM49B|SASH3|MYO1G
GO:0002460	GO Biological Processes	adaptive immune response based on somatic recombination of immune receptors built from immunoglobuli	13	-7.61263	-4.60384	CD8A|CD74|CTSC|GZMM|HLA-C|IL7R|PRF1|RORA|SPN|BTN3A2|FAM49B|SASH3|MYO1G
GO:0001913	GO Biological Processes	T cell mediated cytotoxicity	6	-6.7668	-3.93166	CTSC|GZMM|HLA-C|IL7R|PRF1|FAM49B
GO:0001909	GO Biological Processes	leukocyte mediated cytotoxicity	7	-6.0124	-3.39033	CTSC|GZMB|GZMM|HLA-C|IL7R|PRF1|FAM49B
GO:0001906	GO Biological Processes	cell killing	8	-5.70334	-3.13144	CTSC|GZMB|GZMM|HLA-C|IL7R|PRF1|GNLY|FAM49B
GO:0002709	GO Biological Processes	regulation of T cell mediated immunity	4	-3.42641	-1.29024	HLA-C|IL7R|FAM49B|SASH3
GO:0001914	GO Biological Processes	regulation of T cell mediated cytotoxicity	3	-3.26482	-1.15938	HLA-C|IL7R|FAM49B
GO:0002699	GO Biological Processes	positive regulation of immune effector process	6	-3.15307	-1.08087	CD74|HLA-C|ITGB2|SPON2|FAM49B|SASH3
GO:0031341	GO Biological Processes	regulation of cell killing	4	-2.82772	-0.843836	HLA-C|IL7R|PRF1|FAM49B
GO:0002711	GO Biological Processes	positive regulation of T cell mediated immunity	3	-2.78667	-0.822779	HLA-C|FAM49B|SASH3
GO:0002703	GO Biological Processes	regulation of leukocyte mediated immunity	5	-2.49592	-0.613415	HLA-C|IL7R|ITGB2|FAM49B|SASH3
GO:0002705	GO Biological Processes	positive regulation of leukocyte mediated immunity	4	-2.39461	-0.54174	HLA-C|ITGB2|FAM49B|SASH3
GO:0031343	GO Biological Processes	positive regulation of cell killing	3	-2.35509	-0.517045	HLA-C|PRF1|FAM49B
GO:0002822	GO Biological Processes	regulation of adaptive immune response based on somatic recombination of immune receptors built from	4	-2.26209	-0.452053	HLA-C|IL7R|FAM49B|SASH3
GO:0002706	GO Biological Processes	regulation of lymphocyte mediated immunity	4	-2.22072	-0.425652	HLA-C|IL7R|FAM49B|SASH3
GO:0001910	GO Biological Processes	regulation of leukocyte mediated cytotoxicity	3	-2.18899	-0.408776	HLA-C|IL7R|FAM49B
GO:0002697	GO Biological Processes	regulation of immune effector process	7	-2.13536	-0.367024	CD74|HLA-C|IL7R|ITGB2|SPON2|FAM49B|SASH3
GO:0002819	GO Biological Processes	regulation of adaptive immune response	4	-2.11332	-0.351284	HLA-C|IL7R|FAM49B|SASH3
hsa04650	KEGG Pathway	Natural killer cell mediated cytotoxicity	10	-9.00665	-5.67916	FCGR3A|FYN|GZMB|HLA-C|ITGAL|ITGB2|KLRD1|PRF1|ZAP70|HCST
hsa04612	KEGG Pathway	Antigen processing and presentation	7	-7.02302	-4.12573	CD8A|CD8B|CD74|HLA-C|HLA-DRA|KLRD1|TAP1
hsa05416	KEGG Pathway	Viral myocarditis	6	-6.38221	-3.66102	FYN|HLA-C|HLA-DRA|ITGAL|ITGB2|PRF1
hsa05332	KEGG Pathway	Graft-versus-host disease	5	-5.79728	-3.20929	GZMB|HLA-C|HLA-DRA|KLRD1|PRF1
hsa05330	KEGG Pathway	Allograft rejection	4	-4.46879	-2.08081	GZMB|HLA-C|HLA-DRA|PRF1
hsa04940	KEGG Pathway	Type I diabetes mellitus	4	-4.25369	-1.91915	GZMB|HLA-C|HLA-DRA|PRF1
hsa05320	KEGG Pathway	Autoimmune thyroid disease	4	-3.89463	-1.62376	GZMB|HLA-C|HLA-DRA|PRF1
GO:0019883	GO Biological Processes	antigen processing and presentation of endogenous antigen	3	-3.79731	-1.5754	CD74|HLA-C|TAP1
hsa05168	KEGG Pathway	Herpes simplex infection	6	-3.54059	-1.37135	CD74|HLA-C|HLA-DRA|PPP1CA|CCL5|TAP1
hsa05169	KEGG Pathway	Epstein-Barr virus infection	6	-3.34875	-1.23452	HLA-C|HLA-DRA|IL10RA|ITGAL|SPN|YWHAQ
GO:0019882	GO Biological Processes	antigen processing and presentation	6	-3.07206	-1.03164	CD8A|CD74|CYBA|HLA-C|HLA-DRA|TAP1
GO:0002478	GO Biological Processes	antigen processing and presentation of exogenous peptide antigen	5	-2.78447	-0.822779	CD74|CYBA|HLA-C|HLA-DRA|TAP1
GO:0071346	GO Biological Processes	cellular response to interferon-gamma	5	-2.73088	-0.785976	HLA-C|HLA-DRA|MT2A|CCL4|CCL5
GO:0019884	GO Biological Processes	antigen processing and presentation of exogenous antigen	5	-2.70993	-0.774246	CD74|CYBA|HLA-C|HLA-DRA|TAP1
GO:0048002	GO Biological Processes	antigen processing and presentation of peptide antigen	5	-2.62874	-0.710934	CD74|CYBA|HLA-C|HLA-DRA|TAP1
GO:0034341	GO Biological Processes	response to interferon-gamma	5	-2.54209	-0.648126	HLA-C|HLA-DRA|MT2A|CCL4|CCL5
GO:0002479	GO Biological Processes	antigen processing and presentation of exogenous peptide antigen via MHC class I, TAP-dependent	3	-2.23623	-0.434512	CYBA|HLA-C|TAP1
GO:0042590	GO Biological Processes	antigen processing and presentation of exogenous peptide antigen via MHC class I	3	-2.1737	-0.399254	CYBA|HLA-C|TAP1
GO:0060333	GO Biological Processes	interferon-gamma-mediated signaling pathway	3	-2.0054	-0.264843	HLA-C|HLA-DRA|MT2A
GO:0019221	GO Biological Processes	cytokine-mediated signaling pathway	20	-8.80244	-5.53158	ACTN4|CD74|FYN|HLA-C|HLA-DRA|IL2RB|IL7R|IL10RA|ITGB1|ITGB2|JUNB|LCP1|LTB|MT2A|RAP1B|RORA|CCL4|CCL5|IL32|MIR24-2
R-HSA-449147	Reactome Gene Sets	Signaling by Interleukins	15	-6.3592	-3.649	FYN|IL2RB|IL7R|IL10RA|ITGB1|ITGB2|JUNB|LCP1|PPP2R5C|RAP1B|RORA|CCL4|CCL5|TLN1|IL32
hsa04514	KEGG Pathway	Cell adhesion molecules (CAMs)	10	-8.66907	-5.43599	CD2|CD8A|CD8B|HLA-C|HLA-DRA|ITGAL|ITGB1|ITGB2|CD99|SPN
GO:0050900	GO Biological Processes	leukocyte migration	15	-7.68046	-4.60384	CD2|CD74|FYN|ITGAL|ITGB1|ITGB2|CD99|CCL4|CCL5|SPN|STK10|ZAP70|DOK2|MYO1G|MIR24-2
R-HSA-202733	Reactome Gene Sets	Cell surface interactions at the vascular wall	9	-7.61219	-4.60384	CD2|CD74|FYN|ITGAL|ITGB1|ITGB2|CD99|SPN|DOK2
GO:0007229	GO Biological Processes	integrin-mediated signaling pathway	7	-6.09536	-3.4552	CD63|FLNA|ITGAL|ITGB1|ITGB2|PLEK|TLN1
hsa04670	KEGG Pathway	Leukocyte transendothelial migration	7	-5.85378	-3.25582	ACTN4|CYBA|ITGAL|ITGB1|ITGB2|CD99|RAP1B
GO:0034113	GO Biological Processes	heterotypic cell-cell adhesion	4	-3.62929	-1.44413	CD2|ITGB1|ITGB2|MBP
GO:0045123	GO Biological Processes	cellular extravasation	4	-3.62929	-1.44413	ITGB1|ITGB2|CD99|SPN
GO:0031589	GO Biological Processes	cell-substrate adhesion	8	-3.45835	-1.31329	ACTN4|CD63|FLNA|ITGAL|ITGB1|ITGB2|LGALS1|MYO1G
hsa04015	KEGG Pathway	Rap1 signaling pathway	6	-3.24846	-1.15607	ITGAL|ITGB1|ITGB2|PFN1|RAP1B|TLN1
GO:0061756	GO Biological Processes	leukocyte adhesion to vascular endothelial cell	3	-2.89649	-0.895983	ITGB1|ITGB2|SPN
GO:0043113	GO Biological Processes	receptor clustering	3	-2.61641	-0.702086	FLNA|ITGAL|ITGB2
GO:0033627	GO Biological Processes	cell adhesion mediated by integrin	3	-2.35509	-0.517045	ITGB1|ITGB2|CCL5
GO:0051668	GO Biological Processes	localization within membrane	4	-2.23094	-0.43056	CD2|FLNA|ITGAL|ITGB2
R-HSA-216083	Reactome Gene Sets	Integrin cell surface interactions	3	-2.08622	-0.33026	ITGAL|ITGB1|ITGB2
hsa05340	KEGG Pathway	Primary immunodeficiency	6	-7.63196	-4.60384	CD3D|CD8A|CD8B|IL7R|TAP1|ZAP70
hsa04658	KEGG Pathway	Th1 and Th2 cell differentiation	7	-6.48753	-3.71934	RUNX3|CD3D|CD3G|HLA-DRA|IL2RB|NFATC3|ZAP70
GO:0045059	GO Biological Processes	positive thymic T cell selection	4	-6.44202	-3.69796	CD3D|CD3G|CD74|ZAP70
hsa04640	KEGG Pathway	Hematopoietic cell lineage	7	-6.32994	-3.63176	CD2|CD3D|CD3G|CD8A|CD8B|HLA-DRA|IL7R
GO:0043368	GO Biological Processes	positive T cell selection	5	-6.2158	-3.53872	CD3D|CD3G|CD74|SPN|ZAP70
hsa04660	KEGG Pathway	T cell receptor signaling pathway	7	-6.15213	-3.50263	CD3D|CD3G|CD8A|CD8B|FYN|NFATC3|ZAP70
hsa04659	KEGG Pathway	Th17 cell differentiation	7	-6.03977	-3.40875	CD3D|CD3G|HLA-DRA|IL2RB|NFATC3|RORA|ZAP70
R-HSA-202430	Reactome Gene Sets	Translocation of ZAP-70 to Immunological synapse	4	-5.7177	-3.13783	CD3D|CD3G|HLA-DRA|ZAP70
GO:0045061	GO Biological Processes	thymic T cell selection	4	-5.53227	-2.99086	CD3D|CD3G|CD74|ZAP70
GO:0045058	GO Biological Processes	T cell selection	5	-5.49624	-2.96213	CD3D|CD3G|CD74|SPN|ZAP70
R-HSA-202433	Reactome Gene Sets	Generation of second messenger molecules	4	-4.71689	-2.27386	CD3D|CD3G|HLA-DRA|ZAP70
GO:0033077	GO Biological Processes	T cell differentiation in thymus	5	-4.63767	-2.21242	CD3D|CD3G|CD74|IL7R|ZAP70
R-HSA-388841	Reactome Gene Sets	Costimulation by the CD28 family	5	-4.63767	-2.21242	CD3D|CD3G|FYN|HLA-DRA|PPP2R5C
GO:0002764	GO Biological Processes	immune response-regulating signaling pathway	13	-4.5937	-2.18993	CD3D|CD3G|CYBA|FCGR3A|FYN|HLA-DRA|ITGB2|NFATC3|PRKCH|ZAP70|RAB29|BTN3A2|MYO1G
GO:0002768	GO Biological Processes	immune response-regulating cell surface receptor signaling pathway	11	-4.44397	-2.07031	CD3D|CD3G|FCGR3A|FYN|HLA-DRA|NFATC3|PRKCH|ZAP70|RAB29|BTN3A2|MYO1G
GO:0002253	GO Biological Processes	activation of immune response	13	-4.28241	-1.93561	CD3D|CD3G|CYBA|FCGR3A|FYN|HLA-DRA|ITGB2|PRKCH|ZAP70|RAB29|BTN3A2|MYO1G|PYHIN1
GO:0050852	GO Biological Processes	T cell receptor signaling pathway	7	-4.23065	-1.90066	CD3D|CD3G|FYN|HLA-DRA|ZAP70|RAB29|BTN3A2
GO:0002757	GO Biological Processes	immune response-activating signal transduction	12	-4.15654	-1.84428	CD3D|CD3G|CYBA|FCGR3A|FYN|HLA-DRA|ITGB2|PRKCH|ZAP70|RAB29|BTN3A2|MYO1G
GO:0002429	GO Biological Processes	immune response-activating cell surface receptor signaling pathway	10	-3.98367	-1.7008	CD3D|CD3G|FCGR3A|FYN|HLA-DRA|PRKCH|ZAP70|RAB29|BTN3A2|MYO1G
GO:0050851	GO Biological Processes	antigen receptor-mediated signaling pathway	8	-3.80746	-1.5754	CD3D|CD3G|FYN|HLA-DRA|PRKCH|ZAP70|RAB29|BTN3A2
R-HSA-202427	Reactome Gene Sets	Phosphorylation of CD3 and TCR zeta chains	3	-3.79731	-1.5754	CD3D|CD3G|HLA-DRA
R-HSA-389948	Reactome Gene Sets	PD-1 signaling	3	-3.73815	-1.5331	CD3D|CD3G|HLA-DRA
R-HSA-202403	Reactome Gene Sets	TCR signaling	4	-2.56774	-0.670452	CD3D|CD3G|HLA-DRA|ZAP70
hsa05162	KEGG Pathway	Measles	4	-2.38305	-0.533587	CD3D|CD3G|FYN|IL2RB
GO:0001816	GO Biological Processes	cytokine production	18	-7.29905	-4.34851	CAPN2|CD2|CD74|CYBA|LTB|MBP|NFATC3|SRGN|RORA|SPN|ADGRG1|LITAF|SPON2|BTN3A2|FAM49B|SASH3|PYHIN1|MIR24-2
GO:0001817	GO Biological Processes	regulation of cytokine production	15	-5.6721	-3.10803	CAPN2|CD2|CD74|CYBA|LTB|MBP|SRGN|RORA|SPN|LITAF|SPON2|FAM49B|SASH3|PYHIN1|MIR24-2
GO:0001819	GO Biological Processes	positive regulation of cytokine production	11	-4.78853	-2.32753	CD2|CD74|CYBA|LTB|MBP|RORA|SPN|SPON2|FAM49B|SASH3|PYHIN1
GO:0032609	GO Biological Processes	interferon-gamma production	6	-4.72567	-2.27673	CD2|SPN|BTN3A2|FAM49B|SASH3|MIR24-2
GO:0032760	GO Biological Processes	positive regulation of tumor necrosis factor production	5	-4.20541	-1.88438	CD2|CYBA|SPN|SPON2|SASH3
GO:1903557	GO Biological Processes	positive regulation of tumor necrosis factor superfamily cytokine production	5	-4.15764	-1.84428	CD2|CYBA|SPN|SPON2|SASH3
GO:0032675	GO Biological Processes	regulation of interleukin-6 production	5	-3.0561	-1.018	CAPN2|CD74|CYBA|MBP|SPON2
GO:0032680	GO Biological Processes	regulation of tumor necrosis factor production	5	-2.95655	-0.934321	CD2|CYBA|SPN|SPON2|SASH3
GO:0032635	GO Biological Processes	interleukin-6 production	5	-2.94451	-0.926364	CAPN2|CD74|CYBA|MBP|SPON2
GO:0032640	GO Biological Processes	tumor necrosis factor production	5	-2.92068	-0.911614	CD2|CYBA|SPN|SPON2|SASH3
GO:1903555	GO Biological Processes	regulation of tumor necrosis factor superfamily cytokine production	5	-2.92068	-0.911614	CD2|CYBA|SPN|SPON2|SASH3
GO:0032755	GO Biological Processes	positive regulation of interleukin-6 production	4	-2.90925	-0.904127	CD74|CYBA|MBP|SPON2
GO:0071706	GO Biological Processes	tumor necrosis factor superfamily cytokine production	5	-2.86256	-0.868361	CD2|CYBA|SPN|SPON2|SASH3
GO:0032649	GO Biological Processes	regulation of interferon-gamma production	4	-2.82772	-0.843836	CD2|FAM49B|SASH3|MIR24-2
GO:0002720	GO Biological Processes	positive regulation of cytokine production involved in immune response	3	-2.63924	-0.717917	CD74|SPON2|SASH3
GO:0032729	GO Biological Processes	positive regulation of interferon-gamma production	3	-2.41023	-0.555845	CD2|FAM49B|SASH3
GO:0002718	GO Biological Processes	regulation of cytokine production involved in immune response	3	-2.10031	-0.340717	CD74|SPON2|SASH3
GO:0072676	GO Biological Processes	lymphocyte migration	7	-5.93191	-3.31862	CD99|CCL4|CCL5|SPN|STK10|ZAP70|MYO1G
GO:0072678	GO Biological Processes	T cell migration	5	-4.79523	-2.32806	CD99|CCL5|SPN|ZAP70|MYO1G
GO:0019835	GO Biological Processes	cytolysis	5	-5.85208	-3.25582	GZMH|GZMA|GZMB|GZMM|PRF1
GO:0008626	GO Biological Processes	granzyme-mediated apoptotic signaling pathway	3	-5.65922	-3.10714	GZMH|GZMB|SRGN
GO:1905477	GO Biological Processes	positive regulation of protein localization to membrane	7	-5.65597	-3.10714	STOM|FYN|GZMB|ITGB1|ITGB2|PRKCH|YWHAQ
GO:1903829	GO Biological Processes	positive regulation of cellular protein localization	10	-5.38502	-2.85809	STOM|FLNA|FYN|GZMB|ITGB1|ITGB2|PRKCH|RAB29|YWHAQ|PYHIN1
GO:0070201	GO Biological Processes	regulation of establishment of protein localization	14	-4.79693	-2.32806	CD2|STOM|FLNA|FYN|GZMB|IDH2|ITGB2|LCP1|MBP|SRGN|CCL5|RAB29|YWHAQ|MIR24-2
GO:1905475	GO Biological Processes	regulation of protein localization to membrane	7	-4.44306	-2.07031	STOM|FYN|GZMB|ITGB1|ITGB2|PRKCH|YWHAQ
GO:1903827	GO Biological Processes	regulation of cellular protein localization	11	-4.30693	-1.94406	STOM|FLNA|FYN|GZMB|ITGB1|ITGB2|LCP1|PRKCH|RAB29|YWHAQ|PYHIN1
GO:0072657	GO Biological Processes	protein localization to membrane	12	-4.29394	-1.94072	STOM|FLNA|FYN|GZMB|ITGAL|ITGB1|ITGB2|PRKCH|RPS26|RAB29|SLC9A3R1|YWHAQ
GO:0090087	GO Biological Processes	regulation of peptide transport	13	-4.2582	-1.91915	CD2|CD74|STOM|FLNA|FYN|IDH2|ITGB2|LCP1|MBP|SRGN|CCL5|RAB29|MIR24-2
GO:0051223	GO Biological Processes	regulation of protein transport	12	-3.81105	-1.5754	CD2|STOM|FLNA|FYN|IDH2|ITGB2|LCP1|MBP|SRGN|CCL5|RAB29|MIR24-2
GO:1904951	GO Biological Processes	positive regulation of establishment of protein localization	9	-3.40804	-1.28047	CD2|STOM|FLNA|FYN|GZMB|ITGB2|MBP|RAB29|YWHAQ
GO:0090314	GO Biological Processes	positive regulation of protein targeting to membrane	3	-3.38857	-1.26944	STOM|FYN|ITGB2
GO:0032388	GO Biological Processes	positive regulation of intracellular transport	6	-3.19488	-1.11051	STOM|FLNA|FYN|ITGB2|SCP2|RAB29
GO:0090313	GO Biological Processes	regulation of protein targeting to membrane	3	-3.15258	-1.08087	STOM|FYN|ITGB2
GO:0033157	GO Biological Processes	regulation of intracellular protein transport	6	-3.09199	-1.04455	STOM|FLNA|FYN|ITGB2|LCP1|RAB29
GO:0090316	GO Biological Processes	positive regulation of intracellular protein transport	5	-3.04333	-1.00983	STOM|FLNA|FYN|ITGB2|RAB29
GO:0032386	GO Biological Processes	regulation of intracellular transport	8	-2.9567	-0.934321	STOM|FLNA|FYN|ITGB2|LCP1|RAP1B|SCP2|RAB29
GO:0051222	GO Biological Processes	positive regulation of protein transport	7	-2.36111	-0.518671	CD2|STOM|FLNA|FYN|ITGB2|MBP|RAB29
GO:0090150	GO Biological Processes	establishment of protein localization to membrane	6	-2.23698	-0.434512	STOM|FYN|GZMB|ITGB2|RPS26|YWHAQ
GO:1903533	GO Biological Processes	regulation of protein targeting	3	-2.14374	-0.373054	STOM|FYN|ITGB2
GO:0006968	GO Biological Processes	cellular defense response	5	-5.23427	-2.7278	ITGB1|PRF1|SPN|KLRG1|GNLY
hsa04510	KEGG Pathway	Focal adhesion	8	-5.23388	-2.7278	ACTN4|CAPN2|FLNA|FYN|ITGB1|PPP1CA|RAP1B|TLN1
hsa04611	KEGG Pathway	Platelet activation	5	-3.47445	-1.32055	FYN|ITGB1|PPP1CA|RAP1B|TLN1
R-HSA-449836	Reactome Gene Sets	Other interleukin signaling	6	-2.53398	-0.641674	FYN|IL2RB|PPP2R5C|RAP1B|TLN1|IL32
R-HSA-373755	Reactome Gene Sets	Semaphorin interactions	3	-2.41023	-0.555845	FYN|ITGB1|TLN1
R-HSA-5673001	Reactome Gene Sets	RAF/MAP kinase cascade	5	-2.13339	-0.366433	FYN|IL2RB|PPP2R5C|RAP1B|TLN1
R-HSA-5684996	Reactome Gene Sets	MAPK1/MAPK3 signaling	5	-2.09114	-0.332757	FYN|IL2RB|PPP2R5C|RAP1B|TLN1
R-HSA-9607240	Reactome Gene Sets	FLT3 Signaling	5	-2.01022	-0.268505	FYN|IL2RB|PPP2R5C|RAP1B|TLN1
hsa04145	KEGG Pathway	Phagosome	7	-4.98709	-2.5009	CYBA|FCGR3A|HLA-C|HLA-DRA|ITGB1|ITGB2|TAP1
hsa05140	KEGG Pathway	Leishmaniasis	5	-4.54891	-2.15046	CYBA|FCGR3A|HLA-DRA|ITGB1|ITGB2
hsa05323	KEGG Pathway	Rheumatoid arthritis	5	-4.11105	-1.80311	HLA-DRA|ITGAL|ITGB2|LTB|CCL5
hsa05150	KEGG Pathway	Staphylococcus aureus infection	4	-3.80109	-1.5754	FCGR3A|HLA-DRA|ITGAL|ITGB2
hsa05152	KEGG Pathway	Tuberculosis	5	-2.74146	-0.792809	CD74|FCGR3A|HLA-DRA|IL10RA|ITGB2
GO:0006909	GO Biological Processes	phagocytosis	10	-4.88146	-2.40171	CD3G|CYBA|FCGR3A|FYN|IL2RB|ITGAL|ITGB1|ITGB2|SPON2|MYO1G
R-HSA-2029481	Reactome Gene Sets	FCGR activation	3	-4.62705	-2.21242	CD3G|FCGR3A|FYN
hsa04380	KEGG Pathway	Osteoclast differentiation	4	-2.4299	-0.567599	CYBA|FCGR3A|FYN|JUNB
GO:0002433	GO Biological Processes	immune response-regulating cell surface receptor signaling pathway involved in phagocytosis	4	-2.3267	-0.498736	CD3G|FCGR3A|FYN|MYO1G
GO:0038096	GO Biological Processes	Fc-gamma receptor signaling pathway involved in phagocytosis	4	-2.3267	-0.498736	CD3G|FCGR3A|FYN|MYO1G
GO:0038094	GO Biological Processes	Fc-gamma receptor signaling pathway	4	-2.294	-0.473099	CD3G|FCGR3A|FYN|MYO1G
GO:0002431	GO Biological Processes	Fc receptor mediated stimulatory signaling pathway	4	-2.26209	-0.452053	CD3G|FCGR3A|FYN|MYO1G
GO:0038093	GO Biological Processes	Fc receptor signaling pathway	5	-2.19172	-0.408776	CD3G|FCGR3A|FYN|NFATC3|MYO1G
R-HSA-2029480	Reactome Gene Sets	Fcgamma receptor (FCGR) dependent phagocytosis	3	-2.07231	-0.319957	CD3G|FCGR3A|FYN
GO:0002274	GO Biological Processes	myeloid leukocyte activation	13	-4.76385	-2.30892	CD2|CD63|CD74|CTSC|CYBA|STOM|ITGAL|ITGB2|RAP1B|RORA|CCL5|STK10|CST7
GO:0002366	GO Biological Processes	leukocyte activation involved in immune response	12	-3.7655	-1.55015	CD63|CTSC|CYBA|STOM|ITGAL|ITGB2|LCP1|LGALS1|RAP1B|RORA|SPN|STK10
GO:0002263	GO Biological Processes	cell activation involved in immune response	12	-3.74298	-1.53452	CD63|CTSC|CYBA|STOM|ITGAL|ITGB2|LCP1|LGALS1|RAP1B|RORA|SPN|STK10
R-HSA-6798695	Reactome Gene Sets	Neutrophil degranulation	9	-3.25454	-1.15607	CD63|CTSC|CYBA|STOM|HLA-C|ITGAL|ITGB2|RAP1B|STK10
GO:0042119	GO Biological Processes	neutrophil activation	9	-3.13465	-1.07036	CD63|CTSC|CYBA|STOM|ITGAL|ITGB2|RAP1B|CCL5|STK10
GO:0036230	GO Biological Processes	granulocyte activation	9	-3.10407	-1.05426	CD63|CTSC|CYBA|STOM|ITGAL|ITGB2|RAP1B|CCL5|STK10
GO:0002444	GO Biological Processes	myeloid leukocyte mediated immunity	9	-2.81856	-0.841356	CD63|CTSC|CYBA|STOM|ITGAL|ITGB2|RAP1B|STK10|SPON2
GO:0043312	GO Biological Processes	neutrophil degranulation	8	-2.59249	-0.681627	CD63|CTSC|CYBA|STOM|ITGAL|ITGB2|RAP1B|STK10
GO:0002283	GO Biological Processes	neutrophil activation involved in immune response	8	-2.57613	-0.672617	CD63|CTSC|CYBA|STOM|ITGAL|ITGB2|RAP1B|STK10
GO:0002446	GO Biological Processes	neutrophil mediated immunity	8	-2.51727	-0.628617	CD63|CTSC|CYBA|STOM|ITGAL|ITGB2|RAP1B|STK10
GO:0043299	GO Biological Processes	leukocyte degranulation	8	-2.33612	-0.503864	CD63|CTSC|CYBA|STOM|ITGAL|ITGB2|RAP1B|STK10
GO:0002275	GO Biological Processes	myeloid cell activation involved in immune response	8	-2.2887	-0.469198	CD63|CTSC|CYBA|STOM|ITGAL|ITGB2|RAP1B|STK10
GO:0010959	GO Biological Processes	regulation of metal ion transport	10	-4.64731	-2.21242	ACTN4|ATP2B4|CD63|CYBA|STOM|FLNA|FYN|CCL4|CCL5|SLC9A3R1
GO:0034765	GO Biological Processes	regulation of ion transmembrane transport	11	-4.62811	-2.21242	ACTN4|ATP2B4|CD63|CLIC1|CYBA|STOM|FLNA|FYN|CLIC3|SLC9A3R1|YWHAQ
GO:0043269	GO Biological Processes	regulation of ion transport	13	-4.4441	-2.07031	ACTN4|ATP2B4|CD63|CLIC1|CYBA|STOM|FLNA|FYN|CCL4|CCL5|CLIC3|SLC9A3R1|YWHAQ
GO:0034762	GO Biological Processes	regulation of transmembrane transport	11	-3.99541	-1.70845	ACTN4|ATP2B4|CD63|CLIC1|CYBA|STOM|FLNA|FYN|CLIC3|SLC9A3R1|YWHAQ
GO:1902305	GO Biological Processes	regulation of sodium ion transmembrane transport	4	-3.62929	-1.44413	ACTN4|ATP2B4|STOM|SLC9A3R1
GO:1904062	GO Biological Processes	regulation of cation transmembrane transport	8	-3.57488	-1.39616	ACTN4|ATP2B4|CD63|CYBA|STOM|FLNA|FYN|SLC9A3R1
GO:0002028	GO Biological Processes	regulation of sodium ion transport	4	-3.10655	-1.05436	ACTN4|ATP2B4|STOM|SLC9A3R1
GO:2000649	GO Biological Processes	regulation of sodium ion transmembrane transporter activity	3	-2.68633	-0.75608	ACTN4|STOM|SLC9A3R1
GO:0035725	GO Biological Processes	sodium ion transmembrane transport	4	-2.31571	-0.491998	ACTN4|ATP2B4|STOM|SLC9A3R1
GO:1903409	GO Biological Processes	reactive oxygen species biosynthetic process	6	-4.53693	-2.14375	ATP2B4|CYBA|FYN|ITGB2|RORA|MIR24-2
GO:1903426	GO Biological Processes	regulation of reactive oxygen species biosynthetic process	5	-3.87359	-1.61441	ATP2B4|CYBA|FYN|ITGB2|MIR24-2
R-HSA-6785807	Reactome Gene Sets	Interleukin-4 and Interleukin-13 signaling	4	-2.72085	-0.781022	ITGB1|ITGB2|JUNB|RORA
GO:2000377	GO Biological Processes	regulation of reactive oxygen species metabolic process	5	-2.58002	-0.673096	ATP2B4|CYBA|FYN|ITGB2|MIR24-2
GO:0072593	GO Biological Processes	reactive oxygen species metabolic process	6	-2.57882	-0.673096	ATP2B4|CYBA|FYN|ITGB2|RORA|MIR24-2
GO:1903428	GO Biological Processes	positive regulation of reactive oxygen species biosynthetic process	3	-2.57206	-0.671419	CYBA|ITGB2|MIR24-2
GO:0001944	GO Biological Processes	vasculature development	10	-2.28205	-0.464105	ITGB1|ITGB2|JUNB|NFATC3|RORA|TGFBR3|SH2D2A|ADGRG1|RNF213|MIR24-2
GO:0048514	GO Biological Processes	blood vessel morphogenesis	9	-2.22301	-0.425652	ITGB1|ITGB2|JUNB|RORA|TGFBR3|SH2D2A|ADGRG1|RNF213|MIR24-2
GO:0006809	GO Biological Processes	nitric oxide biosynthetic process	3	-2.20451	-0.413388	ATP2B4|ITGB2|RORA
GO:0046209	GO Biological Processes	nitric oxide metabolic process	3	-2.12906	-0.364578	ATP2B4|ITGB2|RORA
GO:2001057	GO Biological Processes	reactive nitrogen species metabolic process	3	-2.08622	-0.33026	ATP2B4|ITGB2|RORA
GO:0002685	GO Biological Processes	regulation of leukocyte migration	7	-4.29939	-1.94138	CD74|CD99|CCL4|CCL5|SPN|STK10|MIR24-2
GO:0070228	GO Biological Processes	regulation of lymphocyte apoptotic process	4	-3.89463	-1.62376	CD3G|CD74|IL7R|CCL5
GO:1903902	GO Biological Processes	positive regulation of viral life cycle	4	-3.65663	-1.45831	CD74|STOM|LGALS1|CCL5
GO:2000401	GO Biological Processes	regulation of lymphocyte migration	4	-3.60241	-1.42049	CCL4|CCL5|SPN|STK10
GO:1990266	GO Biological Processes	neutrophil migration	5	-3.54079	-1.37135	CD74|ITGB2|CD99|CCL4|CCL5
GO:0043902	GO Biological Processes	positive regulation of multi-organism process	6	-3.5032	-1.34322	CD74|CYBA|STOM|LGALS1|PRF1|CCL5
GO:0030335	GO Biological Processes	positive regulation of cell migration	10	-3.49516	-1.33823	ACTN4|CD74|FLNA|ITGB1|CD99|PFN1|CCL4|CCL5|SPN|SYNE2
GO:0070227	GO Biological Processes	lymphocyte apoptotic process	4	-3.45035	-1.30835	CD3G|CD74|IL7R|CCL5
GO:0070229	GO Biological Processes	negative regulation of lymphocyte apoptotic process	3	-3.4328	-1.29372	CD74|IL7R|CCL5
GO:0002687	GO Biological Processes	positive regulation of leukocyte migration	5	-3.39484	-1.27291	CD74|CD99|CCL4|CCL5|SPN
GO:2000147	GO Biological Processes	positive regulation of cell motility	10	-3.34813	-1.23452	ACTN4|CD74|FLNA|ITGB1|CD99|PFN1|CCL4|CCL5|SPN|SYNE2
GO:0051272	GO Biological Processes	positive regulation of cellular component movement	10	-3.24879	-1.15607	ACTN4|CD74|FLNA|ITGB1|CD99|PFN1|CCL4|CCL5|SPN|SYNE2
GO:0097529	GO Biological Processes	myeloid leukocyte migration	6	-3.22685	-1.1399	CD74|ITGB2|CD99|CCL4|CCL5|MIR24-2
GO:0097530	GO Biological Processes	granulocyte migration	5	-3.18931	-1.1075	CD74|ITGB2|CD99|CCL4|CCL5
GO:0040017	GO Biological Processes	positive regulation of locomotion	10	-3.17534	-1.09861	ACTN4|CD74|FLNA|ITGB1|CD99|PFN1|CCL4|CCL5|SPN|SYNE2
GO:0070372	GO Biological Processes	regulation of ERK1 and ERK2 cascade	7	-3.14801	-1.07878	CD74|RAP1B|CCL4|CCL5|TGFBR3|SLC9A3R1|MIR24-2
GO:2000106	GO Biological Processes	regulation of leukocyte apoptotic process	4	-3.14545	-1.0787	CD3G|CD74|IL7R|CCL5
GO:2000403	GO Biological Processes	positive regulation of lymphocyte migration	3	-3.11739	-1.05555	CCL4|CCL5|SPN
GO:0070371	GO Biological Processes	ERK1 and ERK2 cascade	7	-3.00231	-0.971083	CD74|RAP1B|CCL4|CCL5|TGFBR3|SLC9A3R1|MIR24-2
GO:1904894	GO Biological Processes	positive regulation of STAT cascade	4	-2.96047	-0.934321	FYN|IL7R|IL10RA|CCL5
GO:0035821	GO Biological Processes	modification of morphology or physiology of other organism	5	-2.90889	-0.904127	STOM|PRF1|CCL4|CCL5|GNLY
GO:2000107	GO Biological Processes	negative regulation of leukocyte apoptotic process	3	-2.81317	-0.841356	CD74|IL7R|CCL5
R-HSA-6783783	Reactome Gene Sets	Interleukin-10 signaling	3	-2.81317	-0.841356	IL10RA|CCL4|CCL5
GO:0030593	GO Biological Processes	neutrophil chemotaxis	4	-2.78093	-0.822779	CD74|ITGB2|CCL4|CCL5
GO:0071887	GO Biological Processes	leukocyte apoptotic process	4	-2.78093	-0.822779	CD3G|CD74|IL7R|CCL5
GO:0048524	GO Biological Processes	positive regulation of viral process	4	-2.73563	-0.78886	CD74|STOM|LGALS1|CCL5
hsa04060	KEGG Pathway	Cytokine-cytokine receptor interaction	6	-2.68812	-0.75608	IL2RB|IL7R|IL10RA|LTB|CCL4|CCL5
GO:0071621	GO Biological Processes	granulocyte chemotaxis	4	-2.516	-0.628617	CD74|ITGB2|CCL4|CCL5
GO:0050792	GO Biological Processes	regulation of viral process	5	-2.45995	-0.587024	CD74|STOM|LGALS1|CCL4|CCL5
GO:0043900	GO Biological Processes	regulation of multi-organism process	7	-2.42961	-0.567599	CD74|CYBA|STOM|LGALS1|PRF1|CCL4|CCL5
GO:0070374	GO Biological Processes	positive regulation of ERK1 and ERK2 cascade	5	-2.38196	-0.533587	CD74|RAP1B|CCL4|CCL5|MIR24-2
GO:0043903	GO Biological Processes	regulation of symbiosis, encompassing mutualism through parasitism	5	-2.34028	-0.506589	CD74|STOM|LGALS1|CCL4|CCL5
GO:0019058	GO Biological Processes	viral life cycle	6	-2.26818	-0.452843	CD74|STOM|ITGB1|LGALS1|CCL5|RAB29
GO:1904892	GO Biological Processes	regulation of STAT cascade	4	-2.24124	-0.435483	FYN|IL7R|IL10RA|CCL5
GO:1903900	GO Biological Processes	regulation of viral life cycle	4	-2.22072	-0.425652	CD74|STOM|LGALS1|CCL5
GO:0051851	GO Biological Processes	modification by host of symbiont morphology or physiology	3	-2.20451	-0.413388	STOM|CCL4|CCL5
GO:0051702	GO Biological Processes	interaction with symbiont	3	-2.12906	-0.364578	STOM|CCL4|CCL5
GO:0002690	GO Biological Processes	positive regulation of leukocyte chemotaxis	3	-2.05858	-0.309804	CD74|CCL4|CCL5
GO:0097696	GO Biological Processes	STAT cascade	4	-2.0494	-0.302981	FYN|IL7R|IL10RA|CCL5
GO:0046427	GO Biological Processes	positive regulation of JAK-STAT cascade	3	-2.01844	-0.275555	FYN|IL10RA|CCL5
hsa04810	KEGG Pathway	Regulation of actin cytoskeleton	7	-4.09881	-1.79939	ACTN4|ITGAL|ITGB1|ITGB2|PFN1|PPP1CA|ARPC5L
GO:0051017	GO Biological Processes	actin filament bundle assembly	6	-3.94228	-1.66344	ACTN4|FLNA|ITGB1|LCP1|PFN1|PLEK
GO:0061572	GO Biological Processes	actin filament bundle organization	6	-3.88204	-1.6151	ACTN4|FLNA|ITGB1|LCP1|PFN1|PLEK
hsa05130	KEGG Pathway	Pathogenic Escherichia coli infection	4	-3.83165	-1.58009	FYN|ITGB1|YWHAQ|ARPC5L
GO:0007015	GO Biological Processes	actin filament organization	8	-3.11186	-1.05436	ACTN4|FLNA|ITGB1|LCP1|PFN1|PLEK|DSTN|ARPC5L
hsa05132	KEGG Pathway	Salmonella infection	4	-3.08748	-1.04239	FLNA|PFN1|CCL4|ARPC5L
GO:0030029	GO Biological Processes	actin filament-based process	11	-2.9304	-0.914802	ACTN4|FLNA|ITGB1|LCP1|PFN1|PLEK|TLN1|SLC9A3R1|DSTN|SYNE2|ARPC5L
GO:0030036	GO Biological Processes	actin cytoskeleton organization	10	-2.81831	-0.841356	ACTN4|FLNA|ITGB1|LCP1|PFN1|PLEK|TLN1|SLC9A3R1|DSTN|ARPC5L
GO:0032535	GO Biological Processes	regulation of cellular component size	7	-2.65839	-0.733514	IL7R|PFN1|PLEK|PPP1CA|SLC9A3R1|DSTN|ARPC5L
GO:1902905	GO Biological Processes	positive regulation of supramolecular fiber organization	5	-2.49592	-0.613415	FLNA|PFN1|PLEK|DSTN|ARPC5L
GO:0032233	GO Biological Processes	positive regulation of actin filament bundle assembly	3	-2.48824	-0.607345	FLNA|PFN1|PLEK
hsa05131	KEGG Pathway	Shigellosis	3	-2.41023	-0.555845	ITGB1|PFN1|ARPC5L
GO:0051495	GO Biological Processes	positive regulation of cytoskeleton organization	5	-2.30775	-0.48545	FLNA|PFN1|PLEK|DSTN|ARPC5L
GO:0110053	GO Biological Processes	regulation of actin filament organization	5	-2.0501	-0.302981	FLNA|PFN1|PLEK|DSTN|ARPC5L
GO:0042116	GO Biological Processes	macrophage activation	5	-3.99937	-1.70845	CD74|CTSC|ITGB2|RORA|CST7
GO:0043030	GO Biological Processes	regulation of macrophage activation	4	-3.83165	-1.58009	CD74|CTSC|RORA|CST7
GO:0001774	GO Biological Processes	microglial cell activation	3	-2.78667	-0.822779	CTSC|ITGB2|CST7
GO:0002269	GO Biological Processes	leukocyte activation involved in inflammatory response	3	-2.78667	-0.822779	CTSC|ITGB2|CST7
GO:0061900	GO Biological Processes	glial cell activation	3	-2.55052	-0.654897	CTSC|ITGB2|CST7
GO:0150076	GO Biological Processes	neuroinflammatory response	3	-2.23623	-0.434512	CTSC|ITGB2|CST7
GO:0009617	GO Biological Processes	response to bacterium	12	-3.80532	-1.5754	CAPN2|CYBA|GZMA|IL10RA|JUNB|MT2A|CCL5|SPN|RAB29|LITAF|SPON2|GNLY
GO:0032496	GO Biological Processes	response to lipopolysaccharide	6	-2.26189	-0.452053	CAPN2|IL10RA|JUNB|CCL5|LITAF|SPON2
GO:0002237	GO Biological Processes	response to molecule of bacterial origin	6	-2.1823	-0.404063	CAPN2|IL10RA|JUNB|CCL5|LITAF|SPON2
GO:0043122	GO Biological Processes	regulation of I-kappaB kinase/NF-kappaB signaling	7	-3.79835	-1.5754	CD74|FLNA|FYN|LGALS1|RORA|S100A4|LITAF
GO:0043123	GO Biological Processes	positive regulation of I-kappaB kinase/NF-kappaB signaling	6	-3.56591	-1.39037	CD74|FLNA|FYN|LGALS1|S100A4|LITAF
GO:0007249	GO Biological Processes	I-kappaB kinase/NF-kappaB signaling	7	-3.46371	-1.31329	CD74|FLNA|FYN|LGALS1|RORA|S100A4|LITAF
R-HSA-1500931	Reactome Gene Sets	Cell-Cell communication	4	-2.44187	-0.573653	ACTN4|FLNA|FYN|ITGB1
GO:1900182	GO Biological Processes	positive regulation of protein localization to nucleus	3	-2.25244	-0.445328	FLNA|FYN|PYHIN1
GO:0072643	GO Biological Processes	interferon-gamma secretion	3	-3.79731	-1.5754	CD2|BTN3A2|MIR24-2
GO:0051271	GO Biological Processes	negative regulation of cellular component movement	7	-2.56851	-0.670452	ACTN4|CD74|IDH2|TGFBR3|ADGRG1|SLC9A3R1|MIR24-2
GO:0002790	GO Biological Processes	peptide secretion	9	-2.46282	-0.587024	CD2|CD74|IDH2|MBP|PLEK|SRGN|CCL5|BTN3A2|MIR24-2
GO:0002792	GO Biological Processes	negative regulation of peptide secretion	4	-2.21058	-0.416829	CD74|IDH2|SRGN|MIR24-2
GO:0051048	GO Biological Processes	negative regulation of secretion	5	-2.19918	-0.409358	CD74|IDH2|SRGN|RAP1B|MIR24-2
GO:0050663	GO Biological Processes	cytokine secretion	5	-2.19172	-0.408776	CD2|MBP|SRGN|BTN3A2|MIR24-2
GO:0009306	GO Biological Processes	protein secretion	8	-2.08087	-0.326117	CD2|IDH2|MBP|PLEK|SRGN|CCL5|BTN3A2|MIR24-2
GO:0045185	GO Biological Processes	maintenance of protein location	5	-3.79424	-1.5754	FLNA|SRGN|TLN1|SYNE2|SYNE1
GO:0051651	GO Biological Processes	maintenance of location in cell	4	-2.92613	-0.912716	SRGN|TLN1|SYNE2|SYNE1
GO:0051235	GO Biological Processes	maintenance of location	6	-2.26189	-0.452053	CYBA|FLNA|SRGN|TLN1|SYNE2|SYNE1
GO:0032507	GO Biological Processes	maintenance of protein location in cell	3	-2.25244	-0.445328	TLN1|SYNE2|SYNE1
GO:0010942	GO Biological Processes	positive regulation of cell death	12	-3.64911	-1.45412	CAPN2|CTSC|FYN|GZMA|GZMB|ITGB1|ITGB2|PPP1CA|CCL5|SLC9A3R1|YWHAQ|MIR24-2
GO:0043065	GO Biological Processes	positive regulation of apoptotic process	10	-2.79439	-0.824551	CAPN2|CTSC|GZMA|GZMB|ITGB1|PPP1CA|CCL5|SLC9A3R1|YWHAQ|MIR24-2
GO:0043068	GO Biological Processes	positive regulation of programmed cell death	10	-2.75663	-0.802298	CAPN2|CTSC|GZMA|GZMB|ITGB1|PPP1CA|CCL5|SLC9A3R1|YWHAQ|MIR24-2
GO:2001235	GO Biological Processes	positive regulation of apoptotic signaling pathway	5	-2.74146	-0.792809	CTSC|GZMB|PPP1CA|SLC9A3R1|YWHAQ
GO:0097190	GO Biological Processes	apoptotic signaling pathway	9	-2.57495	-0.672617	CD74|CTSC|FYN|GZMH|GZMB|PPP1CA|SRGN|SLC9A3R1|YWHAQ
GO:2001233	GO Biological Processes	regulation of apoptotic signaling pathway	7	-2.43544	-0.568781	CD74|CTSC|FYN|GZMB|PPP1CA|SLC9A3R1|YWHAQ
GO:0019932	GO Biological Processes	second-messenger-mediated signaling	9	-3.52791	-1.36178	ATP2B4|MT2A|NFATC3|PLEK|CCL4|ZAP70|ADGRG1|SLC9A3R1|GNG2
GO:0050848	GO Biological Processes	regulation of calcium-mediated signaling	4	-2.87608	-0.879791	ATP2B4|PLEK|CCL4|ZAP70
GO:0045744	GO Biological Processes	negative regulation of G protein-coupled receptor signaling pathway	3	-2.63924	-0.717917	ATP2B4|PLEK|CCL5
GO:0019722	GO Biological Processes	calcium-mediated signaling	5	-2.37353	-0.529252	ATP2B4|NFATC3|PLEK|CCL4|ZAP70
GO:0014066	GO Biological Processes	regulation of phosphatidylinositol 3-kinase signaling	5	-3.45824	-1.31329	FYN|PPP2R5C|CCL5|SLC9A3R1|HCST
GO:0014065	GO Biological Processes	phosphatidylinositol 3-kinase signaling	5	-3.10815	-1.05436	FYN|PPP2R5C|CCL5|SLC9A3R1|HCST
GO:0048015	GO Biological Processes	phosphatidylinositol-mediated signaling	5	-2.72037	-0.781022	FYN|PPP2R5C|CCL5|SLC9A3R1|HCST
GO:0048017	GO Biological Processes	inositol lipid-mediated signaling	5	-2.68925	-0.75608	FYN|PPP2R5C|CCL5|SLC9A3R1|HCST
GO:0014068	GO Biological Processes	positive regulation of phosphatidylinositol 3-kinase signaling	3	-2.05858	-0.309804	FYN|CCL5|HCST
GO:0007162	GO Biological Processes	negative regulation of cell adhesion	7	-3.27767	-1.16952	ACTN4|RUNX3|CD74|LGALS1|MBP|SPN|AKNA
GO:0022408	GO Biological Processes	negative regulation of cell-cell adhesion	5	-2.72037	-0.781022	RUNX3|CD74|MBP|SPN|AKNA
GO:0042108	GO Biological Processes	positive regulation of cytokine biosynthetic process	3	-2.37317	-0.529252	CD74|LTB|SPN
GO:0071356	GO Biological Processes	cellular response to tumor necrosis factor	7	-3.25991	-1.15717	ACTN4|CYBA|LTB|RORA|CCL4|CCL5|MIR24-2
GO:0034612	GO Biological Processes	response to tumor necrosis factor	7	-3.08199	-1.03924	ACTN4|CYBA|LTB|RORA|CCL4|CCL5|MIR24-2
GO:0045807	GO Biological Processes	positive regulation of endocytosis	4	-2.17079	-0.397601	ACTN4|CD63|CYBA|IL2RB
hsa04210	KEGG Pathway	Apoptosis	5	-3.24561	-1.15607	CAPN2|CTSC|CTSW|GZMB|PRF1
hsa04142	KEGG Pathway	Lysosome	4	-2.516	-0.628617	CD63|CTSC|CTSW|LITAF
GO:0061351	GO Biological Processes	neural precursor cell proliferation	5	-3.10815	-1.05436	FLNA|RORA|ADGRG1|ZEB2|AKNA
GO:0007420	GO Biological Processes	brain development	11	-3.05223	-1.01643	ATP2B4|FLNA|FYN|ITGB1|MBP|RORA|ADGRG1|ZEB2|YWHAQ|SYNE2|AKNA
GO:0060322	GO Biological Processes	head development	11	-2.85383	-0.861711	ATP2B4|FLNA|FYN|ITGB1|MBP|RORA|ADGRG1|ZEB2|YWHAQ|SYNE2|AKNA
GO:0021543	GO Biological Processes	pallium development	5	-2.81748	-0.841356	ATP2B4|FLNA|ADGRG1|ZEB2|SYNE2
GO:0008347	GO Biological Processes	glial cell migration	3	-2.76076	-0.804522	IDH2|ADGRG1|SYNE2
GO:0030900	GO Biological Processes	forebrain development	7	-2.5811	-0.673096	ATP2B4|FLNA|FYN|ADGRG1|ZEB2|SYNE2|AKNA
GO:0021537	GO Biological Processes	telencephalon development	5	-2.10508	-0.34427	ATP2B4|FLNA|ADGRG1|ZEB2|SYNE2
GO:0045596	GO Biological Processes	negative regulation of cell differentiation	11	-2.94416	-0.926364	ACTN4|RUNX3|CD74|IDH2|ITGB1|LGALS1|NFATC3|RORA|RAB29|ADGRG1|HOPX
GO:0007212	GO Biological Processes	dopamine receptor signaling pathway	3	-2.89649	-0.895983	FLNA|SLC9A3R1|GNG2
GO:0007188	GO Biological Processes	adenylate cyclase-modulating G protein-coupled receptor signaling pathway	5	-2.34028	-0.506589	ATP2B4|FLNA|ADGRG1|SLC9A3R1|GNG2
GO:0007189	GO Biological Processes	adenylate cyclase-activating G protein-coupled receptor signaling pathway	4	-2.31571	-0.491998	ATP2B4|ADGRG1|SLC9A3R1|GNG2
GO:0007187	GO Biological Processes	G protein-coupled receptor signaling pathway, coupled to cyclic nucleotide second messenger	5	-2.07733	-0.323772	ATP2B4|FLNA|ADGRG1|SLC9A3R1|GNG2
R-HSA-418346	Reactome Gene Sets	Platelet homeostasis	3	-2.04503	-0.300974	ATP2B4|PPP2R5C|GNG2
GO:0002286	GO Biological Processes	T cell activation involved in immune response	4	-2.75057	-0.798147	ITGAL|LCP1|RORA|SPN
GO:0002285	GO Biological Processes	lymphocyte activation involved in immune response	5	-2.70993	-0.774246	ITGAL|LCP1|LGALS1|RORA|SPN
GO:0033559	GO Biological Processes	unsaturated fatty acid metabolic process	4	-2.66322	-0.736563	ALOX5AP|CD74|PTGDS|SCP2
GO:0006636	GO Biological Processes	unsaturated fatty acid biosynthetic process	3	-2.61641	-0.702086	ALOX5AP|CD74|PTGDS
GO:0046456	GO Biological Processes	icosanoid biosynthetic process	3	-2.59402	-0.681627	ALOX5AP|CD74|PTGDS
GO:0042752	GO Biological Processes	regulation of circadian rhythm	4	-2.63527	-0.7157	PPP1CA|PTGDS|RORA|BHLHE40
GO:0032922	GO Biological Processes	circadian regulation of gene expression	3	-2.46822	-0.590531	PPP1CA|RORA|BHLHE40
R-HSA-400253	Reactome Gene Sets	Circadian Clock	3	-2.3198	-0.493259	PPP1CA|RORA|BHLHE40
GO:0007163	GO Biological Processes	establishment or maintenance of cell polarity	5	-2.4248	-0.564323	CD3G|RAP1B|CCL4|SPN|SLC9A3R1
GO:0030858	GO Biological Processes	positive regulation of epithelial cell differentiation	3	-2.37317	-0.529252	PRKCH|PLAAT4|ZEB2
GO:0046470	GO Biological Processes	phosphatidylcholine metabolic process	3	-2.11459	-0.351332	CAPN2|DBI|PLAAT4
GO:0071230	GO Biological Processes	cellular response to amino acid stimulus	3	-2.35509	-0.517045	CAPN2|CYBA|FYN
GO:0001101	GO Biological Processes	response to acid chemical	6	-2.17634	-0.399369	ATP2B4|CAPN2|CYBA|FYN|TGFBR3|GNG2
R-HSA-195258	Reactome Gene Sets	RHO GTPase Effectors	6	-2.28082	-0.464105	CYBA|FLNA|ITGB1|PFN1|PPP2R5C|YWHAQ
hsa04151	KEGG Pathway	PI3K-Akt signaling pathway	6	-2.18828	-0.408776	IL2RB|IL7R|ITGB1|PPP2R5C|YWHAQ|GNG2
GO:1902532	GO Biological Processes	negative regulation of intracellular signal transduction	8	-2.19289	-0.408776	ATP2B4|CD74|ITGB1|PLEK|PPP2R5C|RORA|SLC9A3R1|LITAF
GO:0051259	GO Biological Processes	protein complex oligomerization	8	-2.18845	-0.408776	ALOX5AP|CD3D|CD3G|CD74|STOM|PRF1|CCL5|RNF213
GO:0051260	GO Biological Processes	protein homooligomerization	6	-2.13522	-0.367024	ALOX5AP|CD3D|CD3G|STOM|PRF1|RNF213
GO:0006446	GO Biological Processes	regulation of translational initiation	3	-2.1737	-0.399254	EIF3E|PPP1CA|CCL5

## Sheet: Natural killer cell
GO	Category	Description	counts	LogP	Log(q-value)	Gene list
hsa04650	KEGG Pathway	Natural killer cell mediated cytotoxicity	12	-15.7751	-11.4628	CD247|FCER1G|FCGR3A|GZMB|KLRC1|KLRC3|KLRD1|PRF1|TYROBP|CD244|SH2D1B|NCR3
R-HSA-198933	Reactome Gene Sets	Immunoregulatory interactions between a Lymphoid and a non-Lymphoid cell	9	-10.7708	-6.75952	CD247|FCGR3A|KLRC1|KLRD1|TYROBP|CD300A|KLRF1|SH2D1B|NCR3
R-HSA-1280218	Reactome Gene Sets	Adaptive Immune System	10	-5.14793	-2.19739	CD247|CYBA|FCGR3A|KLRC1|KLRD1|TYROBP|CD300A|KLRF1|SH2D1B|NCR3
GO:0002228	GO Biological Processes	natural killer cell mediated immunity	4	-4.83301	-2.07705	GZMB|KLRD1|SH2D1B|NCR3
GO:0002449	GO Biological Processes	lymphocyte mediated immunity	6	-3.82967	-1.36222	FCER1G|GZMB|KLRD1|PRF1|SH2D1B|NCR3
GO:0002708	GO Biological Processes	positive regulation of lymphocyte mediated immunity	3	-2.75034	-0.531498	FCER1G|SH2D1B|NCR3
GO:0002706	GO Biological Processes	regulation of lymphocyte mediated immunity	3	-2.32122	-0.190798	FCER1G|SH2D1B|NCR3
GO:0006909	GO Biological Processes	phagocytosis	10	-8.00065	-4.16551	CD247|CYBA|FCER1G|FCGR3A|FGR|IL2RB|ITGAM|TYROBP|SPON2|CD300A
GO:0002699	GO Biological Processes	positive regulation of immune effector process	8	-7.46961	-3.81647	FCER1G|FGR|ITGAM|SPON2|CD300A|CD244|SH2D1B|NCR3
R-HSA-2029481	Reactome Gene Sets	FCGR activation	3	-5.61583	-2.38781	CD247|FCGR3A|FGR
GO:0050764	GO Biological Processes	regulation of phagocytosis	5	-5.51025	-2.34412	CYBA|FCER1G|FGR|IL2RB|CD300A
GO:0002366	GO Biological Processes	leukocyte activation involved in immune response	10	-5.40328	-2.3247	ADAM8|CYBA|FCER1G|FGR|ITGAM|TYROBP|SYNGR1|CD300A|CD244|SH2D1B
GO:0002444	GO Biological Processes	myeloid leukocyte mediated immunity	9	-5.38815	-2.3247	ADAM8|CYBA|FCER1G|FGR|ITGAM|TYROBP|SYNGR1|SPON2|CD300A
GO:0007229	GO Biological Processes	integrin-mediated signaling pathway	5	-5.38439	-2.3247	FCER1G|FGR|ITGAM|PLEK|TYROBP
GO:0002263	GO Biological Processes	cell activation involved in immune response	10	-5.38169	-2.3247	ADAM8|CYBA|FCER1G|FGR|ITGAM|TYROBP|SYNGR1|CD300A|CD244|SH2D1B
GO:0043300	GO Biological Processes	regulation of leukocyte degranulation	4	-5.32582	-2.31305	FCER1G|FGR|ITGAM|CD300A
GO:0002448	GO Biological Processes	mast cell mediated immunity	4	-5.22157	-2.23153	FCER1G|FGR|SPON2|CD300A
GO:0002703	GO Biological Processes	regulation of leukocyte mediated immunity	6	-5.15964	-2.19739	FCER1G|FGR|ITGAM|CD300A|SH2D1B|NCR3
GO:0045088	GO Biological Processes	regulation of innate immune response	8	-5.08503	-2.15298	ADAM8|CYBA|FCER1G|FGR|ITGAM|CD300A|SH2D1B|NCR3
GO:0002886	GO Biological Processes	regulation of myeloid leukocyte mediated immunity	4	-5.03086	-2.14655	FCER1G|FGR|ITGAM|CD300A
GO:0002697	GO Biological Processes	regulation of immune effector process	8	-5.02993	-2.14655	FCER1G|FGR|ITGAM|SPON2|CD300A|CD244|SH2D1B|NCR3
GO:0050865	GO Biological Processes	regulation of cell activation	9	-5.01172	-2.14655	ADAM8|FCER1G|FGR|ID2|ITGAM|PLEK|TYROBP|CST7|CD300A
GO:0045055	GO Biological Processes	regulated exocytosis	10	-4.96745	-2.14655	ADAM8|CTSW|CYBA|FCER1G|FGR|ITGAM|PLEK|TYROBP|SYNGR1|CD300A
R-HSA-6798695	Reactome Gene Sets	Neutrophil degranulation	8	-4.90976	-2.10265	ADAM8|CYBA|FCER1G|FGR|ITGAM|TYROBP|SYNGR1|CD300A
GO:0002705	GO Biological Processes	positive regulation of leukocyte mediated immunity	5	-4.8831	-2.09004	FCER1G|FGR|ITGAM|SH2D1B|NCR3
GO:0043312	GO Biological Processes	neutrophil degranulation	8	-4.87082	-2.09004	ADAM8|CYBA|FCER1G|FGR|ITGAM|TYROBP|SYNGR1|CD300A
GO:0002283	GO Biological Processes	neutrophil activation involved in immune response	8	-4.85156	-2.08337	ADAM8|CYBA|FCER1G|FGR|ITGAM|TYROBP|SYNGR1|CD300A
GO:0002274	GO Biological Processes	myeloid leukocyte activation	9	-4.81579	-2.07173	ADAM8|CYBA|FCER1G|FGR|ITGAM|TYROBP|CST7|SYNGR1|CD300A
GO:0042119	GO Biological Processes	neutrophil activation	8	-4.78829	-2.06754	ADAM8|CYBA|FCER1G|FGR|ITGAM|TYROBP|SYNGR1|CD300A
GO:0002446	GO Biological Processes	neutrophil mediated immunity	8	-4.78205	-2.06754	ADAM8|CYBA|FCER1G|FGR|ITGAM|TYROBP|SYNGR1|CD300A
GO:0036230	GO Biological Processes	granulocyte activation	8	-4.75719	-2.06598	ADAM8|CYBA|FCER1G|FGR|ITGAM|TYROBP|SYNGR1|CD300A
GO:0043302	GO Biological Processes	positive regulation of leukocyte degranulation	3	-4.66045	-1.98166	FCER1G|FGR|ITGAM
GO:0045089	GO Biological Processes	positive regulation of innate immune response	7	-4.59233	-1.93328	ADAM8|CYBA|FCER1G|ITGAM|CD300A|SH2D1B|NCR3
GO:0043299	GO Biological Processes	leukocyte degranulation	8	-4.5661	-1.91659	ADAM8|CYBA|FCER1G|FGR|ITGAM|TYROBP|SYNGR1|CD300A
GO:0002275	GO Biological Processes	myeloid cell activation involved in immune response	8	-4.50903	-1.86886	ADAM8|CYBA|FCER1G|FGR|ITGAM|TYROBP|SYNGR1|CD300A
GO:0002694	GO Biological Processes	regulation of leukocyte activation	8	-4.35539	-1.75569	ADAM8|FCER1G|FGR|ID2|ITGAM|TYROBP|CST7|CD300A
GO:0002888	GO Biological Processes	positive regulation of myeloid leukocyte mediated immunity	3	-4.31884	-1.73897	FCER1G|FGR|ITGAM
GO:0043304	GO Biological Processes	regulation of mast cell degranulation	3	-4.19668	-1.62478	FCER1G|FGR|CD300A
GO:0033006	GO Biological Processes	regulation of mast cell activation involved in immune response	3	-4.15846	-1.60207	FCER1G|FGR|CD300A
GO:0002757	GO Biological Processes	immune response-activating signal transduction	8	-4.00633	-1.49341	CD247|CYBA|FCER1G|FCGR3A|FGR|ITGAM|CD300A|NCR3
GO:0002764	GO Biological Processes	immune response-regulating signaling pathway	8	-3.85241	-1.37266	CD247|CYBA|FCER1G|FCGR3A|FGR|ITGAM|CD300A|NCR3
GO:0033003	GO Biological Processes	regulation of mast cell activation	3	-3.82938	-1.36222	FCER1G|FGR|CD300A
GO:0031349	GO Biological Processes	positive regulation of defense response	7	-3.74707	-1.29658	ADAM8|CYBA|FCER1G|ITGAM|CD300A|SH2D1B|NCR3
GO:0043303	GO Biological Processes	mast cell degranulation	3	-3.69261	-1.24958	FCER1G|FGR|CD300A
GO:0002279	GO Biological Processes	mast cell activation involved in immune response	3	-3.66698	-1.23553	FCER1G|FGR|CD300A
GO:0002253	GO Biological Processes	activation of immune response	8	-3.64593	-1.22015	CD247|CYBA|FCER1G|FCGR3A|FGR|ITGAM|CD300A|NCR3
GO:1903307	GO Biological Processes	positive regulation of regulated secretory pathway	3	-3.61726	-1.1971	FCER1G|FGR|ITGAM
GO:0050867	GO Biological Processes	positive regulation of cell activation	6	-3.57236	-1.16319	ADAM8|FCER1G|FGR|ITGAM|PLEK|TYROBP
GO:0038094	GO Biological Processes	Fc-gamma receptor signaling pathway	4	-3.50952	-1.11633	CD247|FCER1G|FCGR3A|FGR
GO:0002431	GO Biological Processes	Fc receptor mediated stimulatory signaling pathway	4	-3.475	-1.09216	CD247|FCER1G|FCGR3A|FGR
GO:0051047	GO Biological Processes	positive regulation of secretion	6	-3.37565	-1.01202	ADAM8|CYBA|FCER1G|FGR|ITGAM|CD244
GO:0045576	GO Biological Processes	mast cell activation	3	-3.37489	-1.01202	FCER1G|FGR|CD300A
GO:0030100	GO Biological Processes	regulation of endocytosis	5	-3.32404	-0.966017	CYBA|FCER1G|FGR|IL2RB|CD300A
GO:1903305	GO Biological Processes	regulation of regulated secretory pathway	4	-3.28285	-0.939073	FCER1G|FGR|ITGAM|CD300A
GO:0050766	GO Biological Processes	positive regulation of phagocytosis	3	-3.26054	-0.921402	CYBA|FCER1G|IL2RB
GO:0002429	GO Biological Processes	immune response-activating cell surface receptor signaling pathway	6	-3.15301	-0.840747	CD247|FCER1G|FCGR3A|FGR|CD300A|NCR3
GO:0032418	GO Biological Processes	lysosome localization	3	-3.13951	-0.835852	FCER1G|FGR|CD300A
GO:0002768	GO Biological Processes	immune response-regulating cell surface receptor signaling pathway	6	-3.00126	-0.717083	CD247|FCER1G|FCGR3A|FGR|CD300A|NCR3
R-HSA-2029480	Reactome Gene Sets	Fcgamma receptor (FCGR) dependent phagocytosis	3	-2.99996	-0.717083	CD247|FCGR3A|FGR
GO:0045921	GO Biological Processes	positive regulation of exocytosis	3	-2.97105	-0.708008	FCER1G|FGR|ITGAM
GO:0060627	GO Biological Processes	regulation of vesicle-mediated transport	6	-2.86073	-0.620348	CYBA|FCER1G|FGR|IL2RB|ITGAM|CD300A
GO:1903530	GO Biological Processes	regulation of secretion by cell	7	-2.80005	-0.566965	ADAM8|FCER1G|FGR|ITGAM|CD300A|CD244|MCTP2
GO:0017157	GO Biological Processes	regulation of exocytosis	4	-2.79206	-0.562582	FCER1G|FGR|ITGAM|CD300A
GO:0002696	GO Biological Processes	positive regulation of leukocyte activation	5	-2.76632	-0.543966	ADAM8|FCER1G|FGR|ITGAM|TYROBP
GO:1903532	GO Biological Processes	positive regulation of secretion by cell	5	-2.66926	-0.459779	ADAM8|FCER1G|FGR|ITGAM|CD244
GO:0038093	GO Biological Processes	Fc receptor signaling pathway	4	-2.65512	-0.450072	CD247|FCER1G|FCGR3A|FGR
GO:0006911	GO Biological Processes	phagocytosis, engulfment	3	-2.60592	-0.404248	FCER1G|ITGAM|CD300A
GO:0099024	GO Biological Processes	plasma membrane invagination	3	-2.51562	-0.327209	FCER1G|ITGAM|CD300A
GO:0010324	GO Biological Processes	membrane invagination	3	-2.44097	-0.262249	FCER1G|ITGAM|CD300A
GO:0002433	GO Biological Processes	immune response-regulating cell surface receptor signaling pathway involved in phagocytosis	3	-2.40543	-0.239787	CD247|FCGR3A|FGR
GO:0038096	GO Biological Processes	Fc-gamma receptor signaling pathway involved in phagocytosis	3	-2.40543	-0.239787	CD247|FCGR3A|FGR
GO:0002224	GO Biological Processes	toll-like receptor signaling pathway	3	-2.32122	-0.190798	CYBA|ITGAM|CD300A
GO:0002758	GO Biological Processes	innate immune response-activating signal transduction	4	-2.31033	-0.182758	CYBA|FCER1G|ITGAM|CD300A
GO:0045807	GO Biological Processes	positive regulation of endocytosis	3	-2.28139	-0.162257	CYBA|FCER1G|IL2RB
GO:0002218	GO Biological Processes	activation of innate immune response	4	-2.20783	-0.0977019	CYBA|FCER1G|ITGAM|CD300A
GO:0110088	GO Biological Processes	hippocampal neuron apoptotic process	3	-7.35058	-3.81647	CX3CR1|ITGAM|TYROBP
GO:0110089	GO Biological Processes	regulation of hippocampal neuron apoptotic process	3	-7.35058	-3.81647	CX3CR1|ITGAM|TYROBP
GO:0001906	GO Biological Processes	cell killing	6	-5.58613	-2.38781	GZMB|ITGAM|PRF1|TYROBP|GNLY|NCR3
GO:0001909	GO Biological Processes	leukocyte mediated cytotoxicity	5	-5.32428	-2.31305	GZMB|ITGAM|PRF1|TYROBP|NCR3
GO:0032930	GO Biological Processes	positive regulation of superoxide anion generation	3	-4.97683	-2.14655	CYBA|ITGAM|TYROBP
GO:0032928	GO Biological Processes	regulation of superoxide anion generation	3	-4.77774	-2.06754	CYBA|ITGAM|TYROBP
GO:0031343	GO Biological Processes	positive regulation of cell killing	4	-4.755	-2.06598	ITGAM|PRF1|TYROBP|NCR3
GO:0042554	GO Biological Processes	superoxide anion generation	3	-4.12137	-1.57996	CYBA|ITGAM|TYROBP
GO:0090322	GO Biological Processes	regulation of superoxide metabolic process	3	-4.12137	-1.57996	CYBA|ITGAM|TYROBP
GO:0031341	GO Biological Processes	regulation of cell killing	4	-4.07901	-1.5466	ITGAM|PRF1|TYROBP|NCR3
GO:0001774	GO Biological Processes	microglial cell activation	3	-3.74552	-1.29658	ITGAM|TYROBP|CST7
GO:0002269	GO Biological Processes	leukocyte activation involved in inflammatory response	3	-3.74552	-1.29658	ITGAM|TYROBP|CST7
GO:0001912	GO Biological Processes	positive regulation of leukocyte mediated cytotoxicity	3	-3.54627	-1.14249	ITGAM|TYROBP|NCR3
GO:0061900	GO Biological Processes	glial cell activation	3	-3.50112	-1.11314	ITGAM|TYROBP|CST7
GO:0006801	GO Biological Processes	superoxide metabolic process	3	-3.20717	-0.881683	CYBA|ITGAM|TYROBP
hsa05140	KEGG Pathway	Leishmaniasis	3	-3.20717	-0.881683	CYBA|FCGR3A|ITGAM
GO:0150076	GO Biological Processes	neuroinflammatory response	3	-3.17287	-0.851831	ITGAM|TYROBP|CST7
GO:0001910	GO Biological Processes	regulation of leukocyte mediated cytotoxicity	3	-3.12318	-0.826155	ITGAM|TYROBP|NCR3
GO:2000377	GO Biological Processes	regulation of reactive oxygen species metabolic process	4	-2.99214	-0.713753	CX3CR1|CYBA|ITGAM|TYROBP
GO:0042116	GO Biological Processes	macrophage activation	3	-2.8751	-0.625562	ITGAM|TYROBP|CST7
GO:0043523	GO Biological Processes	regulation of neuron apoptotic process	4	-2.87337	-0.625562	ADAM8|CX3CR1|ITGAM|TYROBP
GO:2000379	GO Biological Processes	positive regulation of reactive oxygen species metabolic process	3	-2.78639	-0.560485	CYBA|ITGAM|TYROBP
GO:0051402	GO Biological Processes	neuron apoptotic process	4	-2.66824	-0.459779	ADAM8|CX3CR1|ITGAM|TYROBP
hsa04380	KEGG Pathway	Osteoclast differentiation	3	-2.48705	-0.305118	CYBA|FCGR3A|TYROBP
GO:0072593	GO Biological Processes	reactive oxygen species metabolic process	4	-2.39951	-0.239787	CX3CR1|CYBA|ITGAM|TYROBP
hsa04145	KEGG Pathway	Phagosome	3	-2.28139	-0.162257	CYBA|FCGR3A|ITGAM
GO:1901214	GO Biological Processes	regulation of neuron death	4	-2.25078	-0.134421	ADAM8|CX3CR1|ITGAM|TYROBP
hsa05152	KEGG Pathway	Tuberculosis	3	-2.10152	-0.00410525	FCER1G|FCGR3A|ITGAM
GO:0070997	GO Biological Processes	neuron death	4	-2.09115	0	ADAM8|CX3CR1|ITGAM|TYROBP
GO:0006968	GO Biological Processes	cellular defense response	5	-6.8724	-3.40524	CX3CR1|KLRC3|PRF1|TYROBP|GNLY
GO:0048167	GO Biological Processes	regulation of synaptic plasticity	3	-2.04978	0	CX3CR1|TYROBP|SYNGR1
GO:1903557	GO Biological Processes	positive regulation of tumor necrosis factor superfamily cytokine production	5	-5.76344	-2.38781	ADAM8|CYBA|FCER1G|TYROBP|SPON2
GO:1903555	GO Biological Processes	regulation of tumor necrosis factor superfamily cytokine production	6	-5.72151	-2.38781	ADAM8|CX3CR1|CYBA|FCER1G|TYROBP|SPON2
GO:0071706	GO Biological Processes	tumor necrosis factor superfamily cytokine production	6	-5.64534	-2.38781	ADAM8|CX3CR1|CYBA|FCER1G|TYROBP|SPON2
GO:0001816	GO Biological Processes	cytokine production	10	-4.98172	-2.14655	ADAM8|CD247|CX3CR1|CYBA|FCER1G|FGR|TYROBP|ADGRG1|SPON2|CD244
GO:0032680	GO Biological Processes	regulation of tumor necrosis factor production	5	-4.49634	-1.86532	CX3CR1|CYBA|FCER1G|TYROBP|SPON2
GO:0032640	GO Biological Processes	tumor necrosis factor production	5	-4.45774	-1.83567	CX3CR1|CYBA|FCER1G|TYROBP|SPON2
GO:0032760	GO Biological Processes	positive regulation of tumor necrosis factor production	4	-4.35194	-1.75569	CYBA|FCER1G|TYROBP|SPON2
GO:0032755	GO Biological Processes	positive regulation of interleukin-6 production	4	-4.16493	-1.60207	CYBA|FCER1G|TYROBP|SPON2
GO:0001819	GO Biological Processes	positive regulation of cytokine production	7	-4.07353	-1.5466	ADAM8|CYBA|FCER1G|FGR|TYROBP|SPON2|CD244
GO:0001817	GO Biological Processes	regulation of cytokine production	8	-3.67439	-1.23719	ADAM8|CX3CR1|CYBA|FCER1G|FGR|TYROBP|SPON2|CD244
GO:0032675	GO Biological Processes	regulation of interleukin-6 production	4	-3.39737	-1.0223	CYBA|FCER1G|TYROBP|SPON2
GO:0032635	GO Biological Processes	interleukin-6 production	4	-3.30304	-0.954566	CYBA|FCER1G|TYROBP|SPON2
GO:0042742	GO Biological Processes	defense response to bacterium	5	-3.01963	-0.728553	CYBA|FCER1G|FGR|SPON2|GNLY
GO:0009617	GO Biological Processes	response to bacterium	7	-2.98859	-0.713753	CX3CR1|CYBA|FCER1G|FGR|GZMA|SPON2|GNLY
GO:0098542	GO Biological Processes	defense response to other organism	6	-2.73389	-0.518536	CYBA|FCER1G|FGR|PRF1|SPON2|GNLY
hsa05332	KEGG Pathway	Graft-versus-host disease	4	-5.64056	-2.38781	GZMB|KLRC1|KLRD1|PRF1
GO:0019835	GO Biological Processes	cytolysis	3	-3.98311	-1.48376	GZMA|GZMB|PRF1
hsa04210	KEGG Pathway	Apoptosis	3	-2.41421	-0.241825	CTSW|GZMB|PRF1
GO:2000010	GO Biological Processes	positive regulation of protein localization to cell surface	3	-4.97683	-2.14655	CD247|FCER1G|TYROBP
GO:1903829	GO Biological Processes	positive regulation of cellular protein localization	6	-4.03281	-1.51294	CD247|FCER1G|GZMB|ITGAM|TFDP2|TYROBP
GO:2000008	GO Biological Processes	regulation of protein localization to cell surface	3	-3.98311	-1.48376	CD247|FCER1G|TYROBP
GO:0034394	GO Biological Processes	protein localization to cell surface	3	-3.39504	-1.0223	CD247|FCER1G|TYROBP
GO:1903827	GO Biological Processes	regulation of cellular protein localization	6	-2.92331	-0.667952	CD247|FCER1G|GZMB|ITGAM|TFDP2|TYROBP
GO:0051260	GO Biological Processes	protein homooligomerization	4	-2.07834	0	RHOC|CD247|FCER1G|PRF1
GO:0072677	GO Biological Processes	eosinophil migration	3	-4.60564	-1.93683	ADAM8|CCL4|CD300A
GO:0097529	GO Biological Processes	myeloid leukocyte migration	5	-3.91737	-1.42466	ADAM8|CX3CR1|FCER1G|CCL4|CD300A
GO:0050900	GO Biological Processes	leukocyte migration	7	-3.86688	-1.3807	ADAM8|CX3CR1|FCER1G|ITGAM|CCL4|CD300A|CD244
GO:0097530	GO Biological Processes	granulocyte migration	4	-3.50952	-1.11633	ADAM8|FCER1G|CCL4|CD300A
GO:0002685	GO Biological Processes	regulation of leukocyte migration	4	-2.97574	-0.708008	ADAM8|CX3CR1|CCL4|CD300A
GO:1990266	GO Biological Processes	neutrophil migration	3	-2.59553	-0.397208	ADAM8|FCER1G|CCL4
GO:0060326	GO Biological Processes	cell chemotaxis	4	-2.29018	-0.165441	ADAM8|CX3CR1|FCER1G|CCL4
GO:0032103	GO Biological Processes	positive regulation of response to external stimulus	4	-2.20314	-0.0977019	ADAM8|CYBA|FCER1G|CCL4
GO:0050869	GO Biological Processes	negative regulation of B cell activation	3	-4.36234	-1.75569	ID2|TYROBP|CD300A
GO:0030101	GO Biological Processes	natural killer cell activation	4	-4.33223	-1.74425	ID2|TYROBP|CD244|NCR3
GO:0046649	GO Biological Processes	lymphocyte activation	8	-3.6098	-1.19517	ADAM8|FCER1G|ID2|PRF1|TYROBP|CD300A|CD244|NCR3
GO:0002695	GO Biological Processes	negative regulation of leukocyte activation	4	-3.16709	-0.850467	ID2|TYROBP|CST7|CD300A
GO:0050866	GO Biological Processes	negative regulation of cell activation	4	-2.95951	-0.700328	ID2|TYROBP|CST7|CD300A
GO:0002683	GO Biological Processes	negative regulation of immune system process	5	-2.39702	-0.239787	FCER1G|ID2|TYROBP|CST7|CD300A
GO:0051250	GO Biological Processes	negative regulation of lymphocyte activation	3	-2.34582	-0.203816	ID2|TYROBP|CD300A
GO:1902107	GO Biological Processes	positive regulation of leukocyte differentiation	3	-2.34582	-0.203816	ADAM8|ID2|TYROBP
GO:0050864	GO Biological Processes	regulation of B cell activation	3	-2.06889	0	ID2|TYROBP|CD300A
GO:1903708	GO Biological Processes	positive regulation of hemopoiesis	3	-2.04348	0	ADAM8|ID2|TYROBP
GO:0019932	GO Biological Processes	second-messenger-mediated signaling	6	-3.3176	-0.964377	CX3CR1|PLEK|PTGDR|CCL4|ADGRG1|MCTP2
GO:0019722	GO Biological Processes	calcium-mediated signaling	4	-2.81378	-0.577067	CX3CR1|PLEK|CCL4|MCTP2
hsa04062	KEGG Pathway	Chemokine signaling pathway	3	-2.08182	0	CX3CR1|FGR|CCL4
GO:1904951	GO Biological Processes	positive regulation of establishment of protein localization	6	-3.23109	-0.896553	ADAM8|FGR|GZMB|ITGAM|TFDP2|CD244
hsa05202	KEGG Pathway	Transcriptional misregulation in cancer	4	-3.12138	-0.826155	GZMB|ID2|IL2RB|ITGAM
GO:1905477	GO Biological Processes	positive regulation of protein localization to membrane	3	-2.5649	-0.369911	GZMB|ITGAM|TFDP2
GO:0043065	GO Biological Processes	positive regulation of apoptotic process	6	-2.38385	-0.232442	ADAM8|GZMA|GZMB|ITGAM|TFDP2|TYROBP
GO:0043068	GO Biological Processes	positive regulation of programmed cell death	6	-2.35893	-0.211016	ADAM8|GZMA|GZMB|ITGAM|TFDP2|TYROBP
GO:0010942	GO Biological Processes	positive regulation of cell death	6	-2.21101	-0.0977019	ADAM8|GZMA|GZMB|ITGAM|TFDP2|TYROBP
GO:0070201	GO Biological Processes	regulation of establishment of protein localization	6	-2.16086	-0.0607886	ADAM8|FGR|GZMB|ITGAM|TFDP2|CD244
GO:1905475	GO Biological Processes	regulation of protein localization to membrane	3	-2.04978	0	GZMB|ITGAM|TFDP2
hsa04612	KEGG Pathway	Antigen processing and presentation	3	-3.13951	-0.835852	KLRC1|KLRC3|KLRD1
GO:2000177	GO Biological Processes	regulation of neural precursor cell proliferation	3	-2.97105	-0.708008	CX3CR1|ID2|ADGRG1
GO:0061351	GO Biological Processes	neural precursor cell proliferation	3	-2.32936	-0.193185	CX3CR1|ID2|ADGRG1
GO:0002702	GO Biological Processes	positive regulation of production of molecular mediator of immune response	3	-2.86201	-0.620348	FCER1G|SPON2|CD244
R-HSA-109582	Reactome Gene Sets	Hemostasis	6	-2.55191	-0.360223	CTSW|FCER1G|FGR|ITGAM|PLEK|CD244
GO:0002576	GO Biological Processes	platelet degranulation	3	-2.50601	-0.320857	CTSW|FCER1G|PLEK
R-HSA-202733	Reactome Gene Sets	Cell surface interactions at the vascular wall	3	-2.41421	-0.241825	FCER1G|ITGAM|CD244
GO:0002700	GO Biological Processes	regulation of production of molecular mediator of immune response	3	-2.39671	-0.239787	FCER1G|SPON2|CD244
GO:0044262	GO Biological Processes	cellular carbohydrate metabolic process	4	-2.38334	-0.232442	AOAH|PLEK|CD244|GNPTAB
GO:0002262	GO Biological Processes	myeloid cell homeostasis	3	-2.32936	-0.193185	FCER1G|ID2|TGFBR3
GO:0035821	GO Biological Processes	modification of morphology or physiology of other organism	3	-2.20584	-0.0977019	PRF1|CCL4|GNLY
GO:0009615	GO Biological Processes	response to virus	4	-2.18456	-0.0818084	FGR|PRF1|CCL4|SPON2
GO:1901654	GO Biological Processes	response to ketone	3	-2.01256	0	CYBA|PTGDR|TGFBR3
GO:0018212	GO Biological Processes	peptidyl-tyrosine modification	4	-2.01215	0	FGR|TPST2|CD300A|ABI3

## Sheet: monocyte macrophage
GO	Category	Description	counts	LogP	Log(q-value)	Gene list
GO:0002274	GO Biological Processes	myeloid leukocyte activation	56	-44.6216	-40.3093	AIF1|ASAH1|C5AR1|CD14|CD68|CST3|CTSB|CTSH|CTSS|CYBB|CFD|FCER1G|FCGR2A|FCN1|FGR|FPR1|FTH1|FTL|GRN|HMOX1|CXCL8|LGALS3|LGALS9|LTA4H|LYN|LYZ|MNDA|CFP|SERPINA1|PLAUR|PSAP|S100A8|S100A9|S100A11|S100A12|CCL3|SLC11A1|SPI1|STXBP2|TNF|TNFRSF1B|TYROBP|NAMPT|LILRB2|TCIRG1|NPC2|FGL2|LILRA2|RAB31|COTL1|PYCARD|ADA2|RAB24|CPPED1|PRAM1|CLEC12A
GO:0043299	GO Biological Processes	leukocyte degranulation	51	-42.6445	-38.6333	ASAH1|C5AR1|CD14|CD68|CST3|CTSB|CTSH|CTSS|CYBB|CFD|FCER1G|FCGR2A|FCN1|FGR|FPR1|FTH1|FTL|GRN|HCK|HMOX1|LGALS3|LGALS9|LTA4H|LYN|LYZ|MNDA|CFP|SERPINA1|PLAUR|PSAP|S100A8|S100A9|S100A11|S100A12|CCL3|SLC11A1|STXBP2|TNFRSF1B|TYROBP|LILRB2|TCIRG1|NPC2|FGL2|RAB31|COTL1|PYCARD|ADA2|RAB24|CPPED1|PRAM1|CLEC12A
GO:0002275	GO Biological Processes	myeloid cell activation involved in immune response	51	-42.2362	-38.4011	ASAH1|C5AR1|CD14|CD68|CST3|CTSB|CTSH|CTSS|CYBB|CFD|FCER1G|FCGR2A|FCN1|FGR|FPR1|FTH1|FTL|GRN|HMOX1|LGALS3|LGALS9|LTA4H|LYN|LYZ|MNDA|CFP|SERPINA1|PLAUR|PSAP|S100A8|S100A9|S100A11|S100A12|CCL3|SLC11A1|STXBP2|TNFRSF1B|TYROBP|LILRB2|TCIRG1|NPC2|FGL2|LILRA2|RAB31|COTL1|PYCARD|ADA2|RAB24|CPPED1|PRAM1|CLEC12A
GO:0036230	GO Biological Processes	granulocyte activation	49	-41.3287	-37.6609	ASAH1|C5AR1|CD14|CD68|CST3|CTSB|CTSH|CTSS|CYBB|CFD|FCER1G|FCGR2A|FCN1|FGR|FPR1|FTH1|FTL|GRN|CXCL8|LGALS3|LTA4H|LYZ|MNDA|CFP|SERPINA1|PLAUR|PSAP|S100A8|S100A9|S100A11|S100A12|CCL3|SLC11A1|STXBP2|TNFRSF1B|TYROBP|LILRB2|TCIRG1|NPC2|FGL2|LILRA2|RAB31|COTL1|PYCARD|ADA2|RAB24|CPPED1|PRAM1|CLEC12A
GO:0002263	GO Biological Processes	cell activation involved in immune response	55	-41.2742	-37.6609	ASAH1|C5AR1|CD14|CD68|CST3|CTSB|CTSH|CTSS|CYBB|CFD|FCER1G|FCGR2A|FCN1|FGR|FPR1|FTH1|FTL|GRN|HMOX1|LGALS3|LGALS9|LRP1|LTA4H|LYN|LYZ|MNDA|NOTCH2|CFP|SERPINA1|PLAUR|PSAP|S100A8|S100A9|S100A11|S100A12|CCL3|SLC11A1|STXBP2|TNFRSF1B|TYROBP|LILRB2|TCIRG1|NPC2|LILRB1|FGL2|LILRA2|RAB31|COTL1|PYCARD|ADA2|RAB24|CPPED1|NFKBIZ|PRAM1|CLEC12A
GO:0045055	GO Biological Processes	regulated exocytosis	57	-41.137	-37.6028	ANXA5|APLP2|ASAH1|C5AR1|CD14|CD68|CST3|CTSB|CTSH|CTSS|CYBB|CFD|FCER1G|FCGR2A|FCN1|FGR|FPR1|FTH1|FTL|GNAI2|GRN|HCK|HMOX1|LGALS3|LGALS9|LTA4H|LYN|LYZ|MNDA|CFP|SERPINA1|PLAUR|PSAP|S100A8|S100A9|S100A11|S100A12|CCL3|SLC11A1|STXBP2|TIMP1|TNFRSF1B|TYROBP|STX11|LILRB2|TCIRG1|NPC2|FGL2|RAB31|COTL1|PYCARD|ADA2|RAB24|CPPED1|RAB11FIP1|PRAM1|CLEC12A
GO:0002444	GO Biological Processes	myeloid leukocyte mediated immunity	50	-40.6145	-37.1473	ASAH1|C5AR1|CD14|CD68|CST3|CTSB|CTSH|CTSS|CYBB|CFD|FCER1G|FCGR2A|FCN1|FGR|FPR1|FTH1|FTL|GRN|HMOX1|LGALS3|LGALS9|LTA4H|LYN|LYZ|MNDA|CFP|SERPINA1|PLAUR|PSAP|S100A8|S100A9|S100A11|S100A12|CCL3|SLC11A1|STXBP2|TNFRSF1B|TYROBP|LILRB2|TCIRG1|NPC2|FGL2|RAB31|COTL1|PYCARD|ADA2|RAB24|CPPED1|PRAM1|CLEC12A
GO:0042119	GO Biological Processes	neutrophil activation	48	-40.2153	-36.8155	ASAH1|C5AR1|CD14|CD68|CST3|CTSB|CTSH|CTSS|CYBB|CFD|FCER1G|FCGR2A|FCN1|FGR|FPR1|FTH1|FTL|GRN|CXCL8|LGALS3|LTA4H|LYZ|MNDA|CFP|SERPINA1|PLAUR|PSAP|S100A8|S100A9|S100A11|S100A12|SLC11A1|STXBP2|TNFRSF1B|TYROBP|LILRB2|TCIRG1|NPC2|FGL2|LILRA2|RAB31|COTL1|PYCARD|ADA2|RAB24|CPPED1|PRAM1|CLEC12A
GO:0002366	GO Biological Processes	leukocyte activation involved in immune response	54	-40.1735	-36.8155	ASAH1|C5AR1|CD14|CD68|CST3|CTSB|CTSH|CTSS|CYBB|CFD|FCER1G|FCGR2A|FCN1|FGR|FPR1|FTH1|FTL|GRN|HMOX1|LGALS3|LGALS9|LTA4H|LYN|LYZ|MNDA|NOTCH2|CFP|SERPINA1|PLAUR|PSAP|S100A8|S100A9|S100A11|S100A12|CCL3|SLC11A1|STXBP2|TNFRSF1B|TYROBP|LILRB2|TCIRG1|NPC2|LILRB1|FGL2|LILRA2|RAB31|COTL1|PYCARD|ADA2|RAB24|CPPED1|NFKBIZ|PRAM1|CLEC12A
GO:0002283	GO Biological Processes	neutrophil activation involved in immune response	47	-39.315	-36.0027	ASAH1|C5AR1|CD14|CD68|CST3|CTSB|CTSH|CTSS|CYBB|CFD|FCER1G|FCGR2A|FCN1|FGR|FPR1|FTH1|FTL|GRN|LGALS3|LTA4H|LYZ|MNDA|CFP|SERPINA1|PLAUR|PSAP|S100A8|S100A9|S100A11|S100A12|SLC11A1|STXBP2|TNFRSF1B|TYROBP|LILRB2|TCIRG1|NPC2|FGL2|LILRA2|RAB31|COTL1|PYCARD|ADA2|RAB24|CPPED1|PRAM1|CLEC12A
GO:0043312	GO Biological Processes	neutrophil degranulation	46	-38.129	-34.8581	ASAH1|C5AR1|CD14|CD68|CST3|CTSB|CTSH|CTSS|CYBB|CFD|FCER1G|FCGR2A|FCN1|FGR|FPR1|FTH1|FTL|GRN|LGALS3|LTA4H|LYZ|MNDA|CFP|SERPINA1|PLAUR|PSAP|S100A8|S100A9|S100A11|S100A12|SLC11A1|STXBP2|TNFRSF1B|TYROBP|LILRB2|TCIRG1|NPC2|FGL2|RAB31|COTL1|PYCARD|ADA2|RAB24|CPPED1|PRAM1|CLEC12A
GO:0002446	GO Biological Processes	neutrophil mediated immunity	46	-37.565	-34.3319	ASAH1|C5AR1|CD14|CD68|CST3|CTSB|CTSH|CTSS|CYBB|CFD|FCER1G|FCGR2A|FCN1|FGR|FPR1|FTH1|FTL|GRN|LGALS3|LTA4H|LYZ|MNDA|CFP|SERPINA1|PLAUR|PSAP|S100A8|S100A9|S100A11|S100A12|SLC11A1|STXBP2|TNFRSF1B|TYROBP|LILRB2|TCIRG1|NPC2|FGL2|RAB31|COTL1|PYCARD|ADA2|RAB24|CPPED1|PRAM1|CLEC12A
R-HSA-6798695	Reactome Gene Sets	Neutrophil degranulation	43	-34.5077	-31.3094	ASAH1|C5AR1|CD14|CD68|CST3|CTSB|CTSH|CTSS|CYBB|CFD|FCER1G|FCGR2A|FCN1|FGR|FPR1|FTH1|FTL|GRN|LGALS3|LTA4H|LYZ|MNDA|CFP|SERPINA1|PLAUR|PSAP|S100A8|S100A9|S100A11|S100A12|SLC11A1|TNFRSF1B|TYROBP|TCIRG1|NPC2|FGL2|RAB31|COTL1|PYCARD|ADA2|RAB24|CPPED1|CLEC12A
GO:0001816	GO Biological Processes	cytokine production	36	-18.677	-15.5109	AIF1|TSPO|C5AR1|CASP1|CD14|CSF1R|CYBB|EREG|FCER1G|FCN1|FGR|HMOX1|IL1B|LGALS9|LRP1|LYN|MNDA|MYD88|S100A8|S100A9|S100A12|CCL3|SLC11A1|TNF|TNFRSF1B|TYROBP|KLF4|LILRB2|TCIRG1|LILRB1|LILRA2|PYCARD|VSIR|CLEC7A|CARD16|LILRA5
GO:0009617	GO Biological Processes	response to bacterium	32	-16.5918	-13.4557	TSPO|C5AR1|CASP1|CD14|CD68|LYST|FCER1G|FGR|GPX1|GRN|HCK|IL1B|CXCL8|LGALS9|LYN|LYZ|MYD88|CFP|S100A8|S100A9|S100A12|CCL3|SLC11A1|TNF|TNFRSF1B|MAPKAPK3|LILRB2|LILRB1|LILRA2|PYCARD|CARD16|MPEG1
GO:0001817	GO Biological Processes	regulation of cytokine production	32	-16.2763	-13.1681	AIF1|TSPO|C5AR1|CASP1|CD14|CSF1R|CYBB|EREG|FCER1G|FCN1|FGR|HMOX1|IL1B|LGALS9|LRP1|LYN|MNDA|MYD88|CCL3|SLC11A1|TNF|TNFRSF1B|TYROBP|KLF4|LILRB2|LILRB1|LILRA2|PYCARD|VSIR|CLEC7A|CARD16|LILRA5
GO:0001819	GO Biological Processes	positive regulation of cytokine production	26	-15.5903	-12.5085	AIF1|C5AR1|CASP1|CD14|CSF1R|CYBB|EREG|FCER1G|FCN1|FGR|HMOX1|IL1B|LGALS9|LRP1|MNDA|MYD88|CCL3|SLC11A1|TNF|TYROBP|LILRB2|LILRB1|LILRA2|PYCARD|CLEC7A|LILRA5
GO:0050663	GO Biological Processes	cytokine secretion	20	-15.2726	-12.2156	AIF1|CASP1|CD14|CSF1R|FCN1|FGR|IL1B|LGALS9|LRP1|LYN|S100A12|CCL3|TNF|TNFRSF1B|TCIRG1|LILRB1|LILRA2|PYCARD|CARD16|LILRA5
GO:0050707	GO Biological Processes	regulation of cytokine secretion	18	-13.9895	-10.9782	AIF1|CASP1|CD14|CSF1R|FCN1|FGR|IL1B|LGALS9|LRP1|LYN|CCL3|TNF|TNFRSF1B|LILRB1|LILRA2|PYCARD|CARD16|LILRA5
GO:0032496	GO Biological Processes	response to lipopolysaccharide	21	-13.7096	-10.7196	TSPO|C5AR1|CASP1|CD14|CD68|HCK|IL1B|CXCL8|LGALS9|LYN|S100A8|CCL3|SLC11A1|TNF|TNFRSF1B|MAPKAPK3|LILRB2|LILRB1|LILRA2|PYCARD|CARD16
GO:0002790	GO Biological Processes	peptide secretion	27	-13.4066	-10.5032	AIF1|ANXA5|CASP1|CD14|CSF1R|FCN1|FGR|GLUL|IL1B|LGALS9|LRP1|LYN|POU2F2|S100A8|S100A12|CCL3|TCF7L2|TNF|TNFRSF1B|TCIRG1|TNFSF13B|LILRB1|LILRA2|PYCARD|RAB11FIP1|CARD16|LILRA5
GO:0002237	GO Biological Processes	response to molecule of bacterial origin	21	-13.3797	-10.4988	TSPO|C5AR1|CASP1|CD14|CD68|HCK|IL1B|CXCL8|LGALS9|LYN|S100A8|CCL3|SLC11A1|TNF|TNFRSF1B|MAPKAPK3|LILRB2|LILRB1|LILRA2|PYCARD|CARD16
GO:0009306	GO Biological Processes	protein secretion	26	-13.0777	-10.2126	AIF1|ANXA5|CASP1|CD14|CSF1R|FCN1|FGR|GLUL|IL1B|LGALS9|LRP1|LYN|POU2F2|S100A12|CCL3|TCF7L2|TNF|TNFRSF1B|TCIRG1|TNFSF13B|LILRB1|LILRA2|PYCARD|RAB11FIP1|CARD16|LILRA5
GO:0002791	GO Biological Processes	regulation of peptide secretion	24	-12.8906	-10.0554	AIF1|ANXA5|CASP1|CD14|CSF1R|FCN1|FGR|GLUL|IL1B|LGALS9|LRP1|LYN|S100A8|CCL3|TCF7L2|TNF|TNFRSF1B|TCIRG1|LILRB1|LILRA2|PYCARD|RAB11FIP1|CARD16|LILRA5
GO:0032755	GO Biological Processes	positive regulation of interleukin-6 production	13	-12.8318	-10.0109	AIF1|EREG|FCER1G|IL1B|LGALS9|MYD88|TNF|TYROBP|LILRB2|LILRA2|PYCARD|CLEC7A|LILRA5
GO:0050708	GO Biological Processes	regulation of protein secretion	23	-12.4959	-9.71508	AIF1|ANXA5|CASP1|CD14|CSF1R|FCN1|FGR|GLUL|IL1B|LGALS9|LRP1|LYN|CCL3|TCF7L2|TNF|TNFRSF1B|TCIRG1|LILRB1|LILRA2|PYCARD|RAB11FIP1|CARD16|LILRA5
GO:1903530	GO Biological Processes	regulation of secretion by cell	28	-12.2675	-9.51151	AIF1|ANXA5|CASP1|CD14|CSF1R|FCER1G|FCN1|FGR|GLUL|GNAI2|HMOX1|IL1B|LGALS9|LRP1|LYN|CCL3|STXBP2|TCF7L2|TNF|TNFRSF1B|TCIRG1|LILRB1|LILRA2|PYCARD|RAB11FIP1|PRAM1|CARD16|LILRA5
GO:0071216	GO Biological Processes	cellular response to biotic stimulus	17	-12.0325	-9.31131	TSPO|CASP1|CD14|CD68|HCK|IL1B|CXCL8|LYN|CCL3|TNF|TNFRSF1B|LILRB2|LILRB1|LILRA2|PYCARD|CLEC7A|CARD16
GO:0050715	GO Biological Processes	positive regulation of cytokine secretion	14	-11.9691	-9.25891	AIF1|CASP1|CD14|CSF1R|FCN1|FGR|IL1B|LGALS9|LRP1|CCL3|TNF|LILRA2|PYCARD|LILRA5
GO:0071222	GO Biological Processes	cellular response to lipopolysaccharide	16	-11.8834	-9.18391	TSPO|CASP1|CD14|CD68|HCK|IL1B|CXCL8|LYN|CCL3|TNF|TNFRSF1B|LILRB2|LILRB1|LILRA2|PYCARD|CARD16
GO:0071219	GO Biological Processes	cellular response to molecule of bacterial origin	16	-11.6595	-9.00999	TSPO|CASP1|CD14|CD68|HCK|IL1B|CXCL8|LYN|CCL3|TNF|TNFRSF1B|LILRB2|LILRB1|LILRA2|PYCARD|CARD16
GO:0002793	GO Biological Processes	positive regulation of peptide secretion	17	-10.6268	-8.06268	AIF1|CASP1|CD14|CSF1R|FCN1|FGR|GLUL|IL1B|LGALS9|LRP1|S100A8|CCL3|TCF7L2|TNF|LILRA2|PYCARD|LILRA5
GO:0032675	GO Biological Processes	regulation of interleukin-6 production	13	-10.2438	-7.72388	AIF1|EREG|FCER1G|IL1B|LGALS9|MYD88|TNF|TYROBP|LILRB2|LILRA2|PYCARD|CLEC7A|LILRA5
GO:0050714	GO Biological Processes	positive regulation of protein secretion	16	-10.099	-7.61283	AIF1|CASP1|CD14|CSF1R|FCN1|FGR|GLUL|IL1B|LGALS9|LRP1|CCL3|TCF7L2|TNF|LILRA2|PYCARD|LILRA5
GO:0032731	GO Biological Processes	positive regulation of interleukin-1 beta production	9	-10.0354	-7.56204	CASP1|LGALS9|MNDA|CCL3|TYROBP|LILRA2|PYCARD|CLEC7A|LILRA5
GO:0032680	GO Biological Processes	regulation of tumor necrosis factor production	13	-9.96331	-7.51437	TSPO|CD14|CYBB|FCER1G|LGALS9|CCL3|TYROBP|LILRB1|LILRA2|PYCARD|VSIR|CLEC7A|LILRA5
GO:0032635	GO Biological Processes	interleukin-6 production	13	-9.92936	-7.50359	AIF1|EREG|FCER1G|IL1B|LGALS9|MYD88|TNF|TYROBP|LILRB2|LILRA2|PYCARD|CLEC7A|LILRA5
GO:0032640	GO Biological Processes	tumor necrosis factor production	13	-9.86217	-7.45839	TSPO|CD14|CYBB|FCER1G|LGALS9|CCL3|TYROBP|LILRB1|LILRA2|PYCARD|VSIR|CLEC7A|LILRA5
GO:1903555	GO Biological Processes	regulation of tumor necrosis factor superfamily cytokine production	13	-9.86217	-7.45839	TSPO|CD14|CYBB|FCER1G|LGALS9|CCL3|TYROBP|LILRB1|LILRA2|PYCARD|VSIR|CLEC7A|LILRA5
GO:0032611	GO Biological Processes	interleukin-1 beta production	11	-9.83664	-7.43819	CASP1|IL1B|LGALS9|MNDA|CCL3|TYROBP|LILRA2|PYCARD|CLEC7A|CARD16|LILRA5
GO:0051047	GO Biological Processes	positive regulation of secretion	19	-9.70412	-7.32636	AIF1|CASP1|CD14|CSF1R|FCER1G|FCN1|FGR|GLUL|GNAI2|IL1B|LGALS9|LRP1|S100A8|CCL3|TCF7L2|TNF|LILRA2|PYCARD|LILRA5
GO:0071706	GO Biological Processes	tumor necrosis factor superfamily cytokine production	13	-9.69815	-7.32541	TSPO|CD14|CYBB|FCER1G|LGALS9|CCL3|TYROBP|LILRB1|LILRA2|PYCARD|VSIR|CLEC7A|LILRA5
GO:0032732	GO Biological Processes	positive regulation of interleukin-1 production	9	-9.52017	-7.17639	CASP1|LGALS9|MNDA|CCL3|TYROBP|LILRA2|PYCARD|CLEC7A|LILRA5
GO:0090087	GO Biological Processes	regulation of peptide transport	24	-9.48201	-7.14287	AIF1|ANXA5|CASP1|CD14|CSF1R|FCN1|FGR|GLUL|IL1B|LGALS9|LRP1|LYN|S100A8|CCL3|TCF7L2|TNF|TNFRSF1B|TCIRG1|LILRB1|LILRA2|PYCARD|RAB11FIP1|CARD16|LILRA5
GO:0032760	GO Biological Processes	positive regulation of tumor necrosis factor production	10	-9.31724	-7.00498	CD14|CYBB|FCER1G|LGALS9|CCL3|TYROBP|LILRA2|PYCARD|CLEC7A|LILRA5
GO:0070201	GO Biological Processes	regulation of establishment of protein localization	24	-9.28218	-6.97424	AIF1|ANXA5|BID|CASP1|CD14|CSF1R|FCN1|FGR|GLUL|IL1B|LGALS9|LRP1|LYN|CCL3|TCF7L2|TNF|TNFRSF1B|TCIRG1|LILRB1|LILRA2|PYCARD|RAB11FIP1|CARD16|LILRA5
GO:0032612	GO Biological Processes	interleukin-1 production	11	-9.22853	-6.92487	CASP1|IL1B|LGALS9|MNDA|CCL3|TYROBP|LILRA2|PYCARD|CLEC7A|CARD16|LILRA5
GO:1903557	GO Biological Processes	positive regulation of tumor necrosis factor superfamily cytokine production	10	-9.21703	-6.91761	CD14|CYBB|FCER1G|LGALS9|CCL3|TYROBP|LILRA2|PYCARD|CLEC7A|LILRA5
GO:0051223	GO Biological Processes	regulation of protein transport	23	-9.09258	-6.80562	AIF1|ANXA5|CASP1|CD14|CSF1R|FCN1|FGR|GLUL|IL1B|LGALS9|LRP1|LYN|CCL3|TCF7L2|TNF|TNFRSF1B|TCIRG1|LILRB1|LILRA2|PYCARD|RAB11FIP1|CARD16|LILRA5
GO:0032651	GO Biological Processes	regulation of interleukin-1 beta production	10	-9.07138	-6.7885	CASP1|LGALS9|MNDA|CCL3|TYROBP|LILRA2|PYCARD|CLEC7A|CARD16|LILRA5
GO:2000778	GO Biological Processes	positive regulation of interleukin-6 secretion	7	-8.67692	-6.4402	AIF1|IL1B|LGALS9|TNF|LILRA2|PYCARD|LILRA5
GO:0032653	GO Biological Processes	regulation of interleukin-10 production	8	-8.55047	-6.32457	FCER1G|LGALS9|TYROBP|LILRB1|PYCARD|VSIR|CLEC7A|LILRA5
GO:0032652	GO Biological Processes	regulation of interleukin-1 production	10	-8.49658	-6.27422	CASP1|LGALS9|MNDA|CCL3|TYROBP|LILRA2|PYCARD|CLEC7A|CARD16|LILRA5
GO:1903532	GO Biological Processes	positive regulation of secretion by cell	17	-8.45766	-6.24076	AIF1|CASP1|CD14|CSF1R|FCER1G|FCN1|FGR|GLUL|IL1B|LGALS9|LRP1|CCL3|TCF7L2|TNF|LILRA2|PYCARD|LILRA5
GO:0032613	GO Biological Processes	interleukin-10 production	8	-8.34924	-6.14418	FCER1G|LGALS9|TYROBP|LILRB1|PYCARD|VSIR|CLEC7A|LILRA5
GO:0031663	GO Biological Processes	lipopolysaccharide-mediated signaling pathway	8	-8.15988	-5.97147	CD14|HCK|IL1B|LYN|CCL3|TNF|LILRA2|CARD16
GO:1904951	GO Biological Processes	positive regulation of establishment of protein localization	17	-7.60395	-5.45306	AIF1|BID|CASP1|CD14|CSF1R|FCN1|FGR|GLUL|IL1B|LGALS9|LRP1|CCL3|TCF7L2|TNF|LILRA2|PYCARD|LILRA5
GO:0050706	GO Biological Processes	regulation of interleukin-1 beta secretion	7	-7.4437	-5.32177	CASP1|LGALS9|CCL3|LILRA2|PYCARD|CARD16|LILRA5
GO:0072604	GO Biological Processes	interleukin-6 secretion	7	-7.37779	-5.26693	AIF1|IL1B|LGALS9|TNF|LILRA2|PYCARD|LILRA5
GO:0051222	GO Biological Processes	positive regulation of protein transport	16	-7.33979	-5.24501	AIF1|CASP1|CD14|CSF1R|FCN1|FGR|GLUL|IL1B|LGALS9|LRP1|CCL3|TCF7L2|TNF|LILRA2|PYCARD|LILRA5
GO:0050702	GO Biological Processes	interleukin-1 beta secretion	7	-7.01192	-4.94518	CASP1|LGALS9|CCL3|LILRA2|PYCARD|CARD16|LILRA5
GO:0050704	GO Biological Processes	regulation of interleukin-1 secretion	7	-7.01192	-4.94518	CASP1|LGALS9|CCL3|LILRA2|PYCARD|CARD16|LILRA5
GO:0050718	GO Biological Processes	positive regulation of interleukin-1 beta secretion	6	-6.99301	-4.93291	CASP1|LGALS9|CCL3|LILRA2|PYCARD|LILRA5
GO:0050716	GO Biological Processes	positive regulation of interleukin-1 secretion	6	-6.60894	-4.6063	CASP1|LGALS9|CCL3|LILRA2|PYCARD|LILRA5
GO:0050701	GO Biological Processes	interleukin-1 secretion	7	-6.58875	-4.59036	CASP1|LGALS9|CCL3|LILRA2|PYCARD|CARD16|LILRA5
GO:0071396	GO Biological Processes	cellular response to lipid	18	-6.51492	-4.52694	TSPO|CASP1|CD14|CD68|HCK|NR4A1|IL1B|CXCL8|LYN|CCL3|TNF|TNFRSF1B|KLF4|LILRB2|LILRB1|LILRA2|PYCARD|CARD16
GO:0032733	GO Biological Processes	positive regulation of interleukin-10 production	5	-5.30128	-3.46177	FCER1G|LGALS9|PYCARD|CLEC7A|LILRA5
GO:0050865	GO Biological Processes	regulation of cell activation	28	-14.4532	-11.4197	AIF1|CDKN1A|FCER1G|FGR|GRN|HMOX1|IL1B|LGALS3|LGALS9|LYN|MNDA|CCL3|STXBP2|TNFRSF1B|TYROBP|LST1|LILRB2|TNFSF13B|LILRB1|FGL2|LILRA2|PRELID1|PYCARD|VSIR|NFKBIZ|CLEC7A|PRAM1|LILRA5
GO:0002694	GO Biological Processes	regulation of leukocyte activation	26	-13.4054	-10.5032	AIF1|CDKN1A|FCER1G|FGR|GRN|HMOX1|IL1B|LGALS3|LGALS9|LYN|MNDA|CCL3|STXBP2|TNFRSF1B|TYROBP|LST1|LILRB2|TNFSF13B|LILRB1|FGL2|PRELID1|PYCARD|VSIR|NFKBIZ|CLEC7A|PRAM1
GO:0046649	GO Biological Processes	lymphocyte activation	27	-11.7486	-9.07981	AIF1|CDKN1A|FCER1G|IL1B|LGALS3|LGALS9|LYN|MNDA|NOTCH2|POU2F2|SLC11A1|SPI1|TNFRSF1B|TYROBP|LST1|MAFB|LILRB2|TCIRG1|TNFSF13B|LILRB1|FGL2|PRELID1|PYCARD|VSIR|NFKBIZ|CLEC7A|JAML
GO:0070661	GO Biological Processes	leukocyte proliferation	18	-11.3712	-8.74022	AIF1|CDKN1A|CSF1R|IL1B|LGALS3|LGALS9|LYN|MNDA|SLC11A1|TNFRSF1B|TYROBP|LST1|LILRB2|TCIRG1|TNFSF13B|LILRB1|PYCARD|VSIR
GO:0050670	GO Biological Processes	regulation of lymphocyte proliferation	15	-10.6764	-8.0965	AIF1|CDKN1A|IL1B|LGALS3|LGALS9|LYN|MNDA|TNFRSF1B|TYROBP|LST1|LILRB2|TNFSF13B|LILRB1|PYCARD|VSIR
GO:0032944	GO Biological Processes	regulation of mononuclear cell proliferation	15	-10.6466	-8.07474	AIF1|CDKN1A|IL1B|LGALS3|LGALS9|LYN|MNDA|TNFRSF1B|TYROBP|LST1|LILRB2|TNFSF13B|LILRB1|PYCARD|VSIR
GO:0070663	GO Biological Processes	regulation of leukocyte proliferation	15	-10.2741	-7.7327	AIF1|CDKN1A|IL1B|LGALS3|LGALS9|LYN|MNDA|TNFRSF1B|TYROBP|LST1|LILRB2|TNFSF13B|LILRB1|PYCARD|VSIR
GO:0046651	GO Biological Processes	lymphocyte proliferation	16	-9.98042	-7.52412	AIF1|CDKN1A|IL1B|LGALS3|LGALS9|LYN|MNDA|SLC11A1|TNFRSF1B|TYROBP|LST1|LILRB2|TNFSF13B|LILRB1|PYCARD|VSIR
GO:0042110	GO Biological Processes	T cell activation	20	-9.95379	-7.51075	AIF1|FCER1G|IL1B|LGALS3|LGALS9|LYN|SLC11A1|TNFRSF1B|MAFB|LILRB2|TCIRG1|TNFSF13B|LILRB1|FGL2|PRELID1|PYCARD|VSIR|NFKBIZ|CLEC7A|JAML
GO:0032943	GO Biological Processes	mononuclear cell proliferation	16	-9.93367	-7.50359	AIF1|CDKN1A|IL1B|LGALS3|LGALS9|LYN|MNDA|SLC11A1|TNFRSF1B|TYROBP|LST1|LILRB2|TNFSF13B|LILRB1|PYCARD|VSIR
GO:0050867	GO Biological Processes	positive regulation of cell activation	18	-9.43012	-7.09558	AIF1|CDKN1A|FCER1G|FGR|IL1B|LGALS9|LYN|CCL3|TYROBP|LILRB2|TNFSF13B|LILRB1|LILRA2|PYCARD|VSIR|NFKBIZ|CLEC7A|LILRA5
GO:0051249	GO Biological Processes	regulation of lymphocyte activation	19	-8.81661	-6.56125	AIF1|CDKN1A|IL1B|LGALS3|LGALS9|LYN|MNDA|TNFRSF1B|TYROBP|LST1|LILRB2|TNFSF13B|LILRB1|FGL2|PRELID1|PYCARD|VSIR|NFKBIZ|CLEC7A
GO:0007159	GO Biological Processes	leukocyte cell-cell adhesion	16	-8.66999	-6.43691	AIF1|IL1B|LGALS3|LGALS9|LYN|S100A8|S100A9|TNF|KLF4|LILRB2|TNFSF13B|LILRB1|FGL2|PYCARD|VSIR|NFKBIZ
GO:0002695	GO Biological Processes	negative regulation of leukocyte activation	12	-8.39147	-6.18301	GRN|HMOX1|LGALS3|LGALS9|LYN|MNDA|TYROBP|LST1|LILRB2|LILRB1|FGL2|VSIR
GO:0002696	GO Biological Processes	positive regulation of leukocyte activation	16	-7.92985	-5.75112	AIF1|CDKN1A|FCER1G|FGR|IL1B|LGALS9|LYN|CCL3|TYROBP|LILRB2|TNFSF13B|LILRB1|PYCARD|VSIR|NFKBIZ|CLEC7A
GO:0050866	GO Biological Processes	negative regulation of cell activation	12	-7.76383	-5.59458	GRN|HMOX1|LGALS3|LGALS9|LYN|MNDA|TYROBP|LST1|LILRB2|LILRB1|FGL2|VSIR
GO:0008285	GO Biological Processes	negative regulation of cell proliferation	22	-7.70661	-5.54663	AIF1|TSPO|CDKN1A|CSF1R|EREG|FTH1|HMOX1|IL1B|CXCL8|LGALS9|LYN|MNDA|S100A11|SOD2|TNF|TYROBP|WARS1|LST1|KLF4|LILRB2|LILRB1|VSIR
GO:0097028	GO Biological Processes	dendritic cell differentiation	7	-7.65121	-5.49428	LGALS3|LGALS9|LYN|SPI1|LILRB2|LILRB1|TMEM176B
GO:2001198	GO Biological Processes	regulation of dendritic cell differentiation	5	-7.52206	-5.38006	LGALS3|LGALS9|LILRB2|LILRB1|TMEM176B
GO:1903037	GO Biological Processes	regulation of leukocyte cell-cell adhesion	14	-7.48061	-5.35019	AIF1|IL1B|LGALS3|LGALS9|LYN|TNF|KLF4|LILRB2|TNFSF13B|LILRB1|FGL2|PYCARD|VSIR|NFKBIZ
GO:0032945	GO Biological Processes	negative regulation of mononuclear cell proliferation	8	-7.35263	-5.25101	LGALS9|LYN|MNDA|TYROBP|LST1|LILRB2|LILRB1|VSIR
GO:0050672	GO Biological Processes	negative regulation of lymphocyte proliferation	8	-7.35263	-5.25101	LGALS9|LYN|MNDA|TYROBP|LST1|LILRB2|LILRB1|VSIR
GO:0050863	GO Biological Processes	regulation of T cell activation	14	-7.30573	-5.21878	AIF1|IL1B|LGALS3|LGALS9|LYN|TNFRSF1B|LILRB2|TNFSF13B|LILRB1|FGL2|PRELID1|PYCARD|VSIR|NFKBIZ
GO:0070664	GO Biological Processes	negative regulation of leukocyte proliferation	8	-7.12388	-5.04715	LGALS9|LYN|MNDA|TYROBP|LST1|LILRB2|LILRB1|VSIR
GO:0051250	GO Biological Processes	negative regulation of lymphocyte activation	10	-7.07566	-5.00243	LGALS3|LGALS9|LYN|MNDA|TYROBP|LST1|LILRB2|LILRB1|FGL2|VSIR
GO:0042098	GO Biological Processes	T cell proliferation	11	-7.07415	-5.00243	AIF1|IL1B|LGALS3|LGALS9|SLC11A1|TNFRSF1B|LILRB2|TNFSF13B|LILRB1|PYCARD|VSIR
GO:0042129	GO Biological Processes	regulation of T cell proliferation	10	-6.805	-4.7715	AIF1|IL1B|LGALS3|LGALS9|TNFRSF1B|LILRB2|TNFSF13B|LILRB1|PYCARD|VSIR
GO:0002774	GO Biological Processes	Fc receptor mediated inhibitory signaling pathway	3	-6.47305	-4.49525	LYN|LILRB2|LILRB1
GO:1903039	GO Biological Processes	positive regulation of leukocyte cell-cell adhesion	11	-6.37972	-4.41185	AIF1|IL1B|LGALS9|LYN|TNF|LILRB2|TNFSF13B|LILRB1|PYCARD|VSIR|NFKBIZ
GO:0002291	GO Biological Processes	T cell activation via T cell receptor contact with antigen bound to MHC molecule on antigen presenti	4	-6.32795	-4.36594	LGALS3|LGALS9|LILRB1|FGL2
GO:0051251	GO Biological Processes	positive regulation of lymphocyte activation	13	-6.14866	-4.20189	AIF1|CDKN1A|IL1B|LGALS9|LYN|TYROBP|LILRB2|TNFSF13B|LILRB1|PYCARD|VSIR|NFKBIZ|CLEC7A
GO:0022407	GO Biological Processes	regulation of cell-cell adhesion	14	-5.96754	-4.04078	AIF1|IL1B|LGALS3|LGALS9|LYN|TNF|KLF4|LILRB2|TNFSF13B|LILRB1|FGL2|PYCARD|VSIR|NFKBIZ
GO:0050777	GO Biological Processes	negative regulation of immune response	9	-5.93635	-4.01679	GPX1|GRN|HMOX1|LGALS3|LGALS9|LYN|TNF|LILRB1|FGL2
GO:0050870	GO Biological Processes	positive regulation of T cell activation	10	-5.77276	-3.87713	AIF1|IL1B|LGALS9|LYN|LILRB2|TNFSF13B|LILRB1|PYCARD|VSIR|NFKBIZ
GO:0030155	GO Biological Processes	regulation of cell adhesion	18	-5.72122	-3.83082	AIF1|IL1B|CXCL8|LGALS3|LGALS9|LRP1|LYN|NINJ1|TGFBI|TNF|KLF4|LILRB2|TNFSF13B|LILRB1|FGL2|PYCARD|VSIR|NFKBIZ
GO:0022409	GO Biological Processes	positive regulation of cell-cell adhesion	11	-5.71091	-3.82352	AIF1|IL1B|LGALS9|LYN|TNF|LILRB2|TNFSF13B|LILRB1|PYCARD|VSIR|NFKBIZ
GO:0070665	GO Biological Processes	positive regulation of leukocyte proliferation	8	-5.20129	-3.36615	AIF1|CDKN1A|IL1B|LGALS9|LYN|LILRB2|TNFSF13B|PYCARD
GO:0002767	GO Biological Processes	immune response-inhibiting cell surface receptor signaling pathway	3	-5.17876	-3.3467	LYN|LILRB2|LILRB1
GO:2001188	GO Biological Processes	regulation of T cell activation via T cell receptor contact with antigen bound to MHC molecule on an	3	-5.17876	-3.3467	LGALS3|LGALS9|LILRB1
GO:0030098	GO Biological Processes	lymphocyte differentiation	12	-5.11441	-3.29211	FCER1G|LGALS9|NOTCH2|POU2F2|SPI1|MAFB|LILRB2|TCIRG1|FGL2|PRELID1|VSIR|NFKBIZ
GO:0002286	GO Biological Processes	T cell activation involved in immune response	7	-5.00565	-3.19854	FCER1G|LGALS3|LGALS9|SLC11A1|LILRB1|FGL2|NFKBIZ
GO:0002765	GO Biological Processes	immune response-inhibiting signal transduction	3	-4.73608	-2.96164	LYN|LILRB2|LILRB1
GO:0002698	GO Biological Processes	negative regulation of immune effector process	7	-4.65364	-2.88792	GRN|HMOX1|LGALS3|LGALS9|TNF|LILRB1|FGL2
GO:0045785	GO Biological Processes	positive regulation of cell adhesion	12	-4.54431	-2.79708	AIF1|IL1B|LGALS9|LYN|NINJ1|TNF|LILRB2|TNFSF13B|LILRB1|PYCARD|VSIR|NFKBIZ
GO:1903038	GO Biological Processes	negative regulation of leukocyte cell-cell adhesion	7	-4.45113	-2.71289	LGALS3|LGALS9|KLF4|LILRB2|LILRB1|FGL2|VSIR
GO:0050671	GO Biological Processes	positive regulation of lymphocyte proliferation	7	-4.42962	-2.6937	AIF1|CDKN1A|IL1B|LGALS9|LILRB2|TNFSF13B|PYCARD
GO:0032946	GO Biological Processes	positive regulation of mononuclear cell proliferation	7	-4.40831	-2.67697	AIF1|CDKN1A|IL1B|LGALS9|LILRB2|TNFSF13B|PYCARD
GO:0002285	GO Biological Processes	lymphocyte activation involved in immune response	8	-4.35375	-2.62469	FCER1G|LGALS3|LGALS9|NOTCH2|SLC11A1|LILRB1|FGL2|NFKBIZ
GO:0030217	GO Biological Processes	T cell differentiation	9	-4.29146	-2.56915	FCER1G|LGALS9|MAFB|LILRB2|TCIRG1|FGL2|PRELID1|VSIR|NFKBIZ
GO:0042102	GO Biological Processes	positive regulation of T cell proliferation	6	-4.25374	-2.53807	AIF1|IL1B|LGALS9|LILRB2|TNFSF13B|PYCARD
GO:1902107	GO Biological Processes	positive regulation of leukocyte differentiation	7	-4.10938	-2.41621	LGALS3|LGALS9|TNF|TYROBP|LILRB2|VSIR|NFKBIZ
GO:0045591	GO Biological Processes	positive regulation of regulatory T cell differentiation	3	-3.9366	-2.27465	LGALS9|LILRB2|VSIR
GO:0050868	GO Biological Processes	negative regulation of T cell activation	6	-3.85643	-2.20313	LGALS3|LGALS9|LILRB2|LILRB1|FGL2|VSIR
GO:0007162	GO Biological Processes	negative regulation of cell adhesion	9	-3.68024	-2.05103	LGALS3|LGALS9|LRP1|TGFBI|KLF4|LILRB2|LILRB1|FGL2|VSIR
GO:0022408	GO Biological Processes	negative regulation of cell-cell adhesion	7	-3.53225	-1.92414	LGALS3|LGALS9|KLF4|LILRB2|LILRB1|FGL2|VSIR
GO:1903708	GO Biological Processes	positive regulation of hemopoiesis	7	-3.43266	-1.84712	LGALS3|LGALS9|TNF|TYROBP|LILRB2|VSIR|NFKBIZ
GO:0045580	GO Biological Processes	regulation of T cell differentiation	6	-3.34927	-1.77101	LGALS9|LILRB2|FGL2|PRELID1|VSIR|NFKBIZ
GO:0002507	GO Biological Processes	tolerance induction	3	-3.16054	-1.6286	LGALS9|LYN|LILRB2
GO:0042130	GO Biological Processes	negative regulation of T cell proliferation	4	-3.10797	-1.58388	LGALS9|LILRB2|LILRB1|VSIR
GO:0045619	GO Biological Processes	regulation of lymphocyte differentiation	6	-2.90603	-1.4043	LGALS9|LILRB2|FGL2|PRELID1|VSIR|NFKBIZ
GO:0002292	GO Biological Processes	T cell differentiation involved in immune response	4	-2.87644	-1.37975	FCER1G|LGALS9|FGL2|NFKBIZ
GO:0045589	GO Biological Processes	regulation of regulatory T cell differentiation	3	-2.84237	-1.35293	LGALS9|LILRB2|VSIR
GO:0032720	GO Biological Processes	negative regulation of tumor necrosis factor production	4	-2.82964	-1.34281	TSPO|LGALS9|LILRB1|VSIR
GO:1903556	GO Biological Processes	negative regulation of tumor necrosis factor superfamily cytokine production	4	-2.78433	-1.30202	TSPO|LGALS9|LILRB1|VSIR
GO:0045066	GO Biological Processes	regulatory T cell differentiation	3	-2.76531	-1.28492	LGALS9|LILRB2|VSIR
GO:0032689	GO Biological Processes	negative regulation of interferon-gamma production	3	-2.72862	-1.2552	LGALS9|LILRB1|VSIR
GO:0046636	GO Biological Processes	negative regulation of alpha-beta T cell activation	3	-2.62505	-1.1677	LGALS9|LILRB1|VSIR
GO:0045582	GO Biological Processes	positive regulation of T cell differentiation	4	-2.55819	-1.1134	LGALS9|LILRB2|VSIR|NFKBIZ
GO:0046631	GO Biological Processes	alpha-beta T cell activation	5	-2.53779	-1.09535	LGALS9|TCIRG1|LILRB1|VSIR|NFKBIZ
GO:0035710	GO Biological Processes	CD4-positive, alpha-beta T cell activation	4	-2.39725	-0.978192	LGALS9|TCIRG1|VSIR|NFKBIZ
GO:0046634	GO Biological Processes	regulation of alpha-beta T cell activation	4	-2.38049	-0.963098	LGALS9|LILRB1|VSIR|NFKBIZ
GO:0045621	GO Biological Processes	positive regulation of lymphocyte differentiation	4	-2.36394	-0.948206	LGALS9|LILRB2|VSIR|NFKBIZ
GO:2000514	GO Biological Processes	regulation of CD4-positive, alpha-beta T cell activation	3	-2.04586	-0.674614	LGALS9|VSIR|NFKBIZ
GO:0002253	GO Biological Processes	activation of immune response	29	-13.5318	-10.5619	C5AR1|CD14|CTSB|CTSS|CFD|FCER1G|FCGR2A|FCGR3A|FCN1|FGR|FPR1|HCK|HLA-DRB5|IL1B|LGALS3|LGALS9|LYN|MNDA|MYD88|CFP|S100A8|S100A9|MAPKAPK3|THEMIS2|LILRA2|PYCARD|NFKBIZ|CLEC7A|PRAM1
GO:0002764	GO Biological Processes	immune response-regulating signaling pathway	28	-13.4351	-10.5032	C5AR1|CD14|CTSB|CTSH|CTSS|FCER1G|FCGR2A|FCGR3A|FCN1|FGR|FPR1|HCK|HLA-DRB5|LGALS3|LGALS9|LYN|MNDA|MYD88|S100A8|S100A9|MAPKAPK3|THEMIS2|LILRB2|LILRB1|LILRA2|NFKBIZ|CLEC7A|PRAM1
GO:0031349	GO Biological Processes	positive regulation of defense response	25	-13.4005	-10.5032	CD14|CTSB|CTSS|EREG|FCER1G|FCN1|GRN|HCK|IL1B|LGALS9|LYN|MNDA|MYD88|S100A8|S100A9|S100A12|CCL3|TNF|MAPKAPK3|LILRA2|PYCARD|NFKBIZ|CLEC7A|NEAT1|LILRA5
GO:0002757	GO Biological Processes	immune response-activating signal transduction	25	-11.419	-8.7788	C5AR1|CD14|CTSB|CTSS|FCER1G|FCGR2A|FCGR3A|FCN1|FGR|FPR1|HCK|HLA-DRB5|LGALS3|LGALS9|LYN|MNDA|MYD88|S100A8|S100A9|MAPKAPK3|THEMIS2|LILRA2|NFKBIZ|CLEC7A|PRAM1
GO:0045088	GO Biological Processes	regulation of innate immune response	20	-10.1541	-7.66142	CD14|CTSB|CTSS|EREG|FCER1G|FCN1|FGR|GRN|HCK|LGALS9|LYN|MNDA|MYD88|S100A8|S100A9|MAPKAPK3|LILRB1|LILRA2|PYCARD|CLEC7A
GO:0002218	GO Biological Processes	activation of innate immune response	16	-8.95465	-6.69525	CD14|CTSB|CTSS|FCER1G|FCN1|HCK|LGALS9|LYN|MNDA|MYD88|S100A8|S100A9|MAPKAPK3|LILRA2|PYCARD|CLEC7A
GO:0045089	GO Biological Processes	positive regulation of innate immune response	17	-8.72364	-6.48326	CD14|CTSB|CTSS|EREG|FCER1G|FCN1|HCK|LGALS9|LYN|MNDA|MYD88|S100A8|S100A9|MAPKAPK3|LILRA2|PYCARD|CLEC7A
GO:0002221	GO Biological Processes	pattern recognition receptor signaling pathway	12	-7.73957	-5.57344	CD14|CTSB|CTSS|FCN1|LGALS9|LYN|MYD88|S100A8|S100A9|MAPKAPK3|LILRA2|CLEC7A
GO:0002768	GO Biological Processes	immune response-regulating cell surface receptor signaling pathway	18	-7.72768	-5.56464	C5AR1|FCER1G|FCGR2A|FCGR3A|FCN1|FGR|FPR1|HCK|HLA-DRB5|LGALS3|LYN|MNDA|THEMIS2|LILRB2|LILRB1|LILRA2|NFKBIZ|PRAM1
GO:0002758	GO Biological Processes	innate immune response-activating signal transduction	14	-7.5344	-5.38945	CD14|CTSB|CTSS|FCER1G|FCN1|HCK|LGALS9|LYN|MYD88|S100A8|S100A9|MAPKAPK3|LILRA2|CLEC7A
GO:0002224	GO Biological Processes	toll-like receptor signaling pathway	10	-6.99232	-4.93291	CD14|CTSB|CTSS|LGALS9|LYN|MYD88|S100A8|S100A9|MAPKAPK3|LILRA2
GO:0002429	GO Biological Processes	immune response-activating cell surface receptor signaling pathway	16	-6.62411	-4.61719	C5AR1|FCER1G|FCGR2A|FCGR3A|FCN1|FGR|FPR1|HCK|HLA-DRB5|LGALS3|LYN|MNDA|THEMIS2|LILRA2|NFKBIZ|PRAM1
GO:0052547	GO Biological Processes	regulation of peptidase activity	23	-12.926	-10.0761	APLP2|BID|CASP1|CST3|CSTA|CTSH|GPX1|GRN|LGALS9|LYN|SERPINA1|PLAUR|S100A8|S100A9|TIMP1|TNF|TNFSF10|KLF4|PRELID1|PYCARD|VSIR|CLEC7A|CARD16
GO:0052548	GO Biological Processes	regulation of endopeptidase activity	22	-12.5239	-9.7301	APLP2|BID|CASP1|CST3|CSTA|CTSH|GPX1|LGALS9|LYN|SERPINA1|PLAUR|S100A8|S100A9|TIMP1|TNF|TNFSF10|KLF4|PRELID1|PYCARD|VSIR|CLEC7A|CARD16
GO:0097190	GO Biological Processes	apoptotic signaling pathway	25	-12.0588	-9.32633	BCL2A1|BID|CASP1|CD14|CDKN1A|CTSH|GNAI2|GPX1|HMOX1|IL1B|LGALS3|LGALS9|PLAUR|S100A8|S100A9|SOD2|TCF7L2|TNF|TNFRSF1B|TYROBP|TNFSF10|ZNF385A|PRELID1|PYCARD|G0S2
GO:0010942	GO Biological Processes	positive regulation of cell death	27	-11.8312	-9.15239	ANXA5|BID|TSPO|CASP1|CDKN1A|CTSH|DUSP6|GRN|HMOX1|LGALS9|LRP1|LYN|MNDA|PLAUR|S100A8|S100A9|CCL3|SOD2|TNF|TNFRSF1B|TYROBP|TNFSF10|LILRB1|PRELID1|PYCARD|G0S2|CLEC7A
GO:0043068	GO Biological Processes	positive regulation of programmed cell death	26	-11.721	-9.06192	ANXA5|BID|TSPO|CASP1|CDKN1A|CTSH|DUSP6|GRN|HMOX1|LGALS9|LYN|MNDA|PLAUR|S100A8|S100A9|CCL3|SOD2|TNF|TNFRSF1B|TYROBP|TNFSF10|LILRB1|PRELID1|PYCARD|G0S2|CLEC7A
GO:2001233	GO Biological Processes	regulation of apoptotic signaling pathway	20	-11.0227	-8.41487	BCL2A1|BID|CTSH|GNAI2|GPX1|HMOX1|IL1B|LGALS3|LGALS9|PLAUR|S100A8|S100A9|SOD2|TCF7L2|TNF|TNFSF10|ZNF385A|PRELID1|PYCARD|G0S2
GO:0043065	GO Biological Processes	positive regulation of apoptotic process	25	-11.0196	-8.41487	ANXA5|BID|TSPO|CASP1|CTSH|DUSP6|GRN|HMOX1|LGALS9|LYN|MNDA|PLAUR|S100A8|S100A9|CCL3|SOD2|TNF|TNFRSF1B|TYROBP|TNFSF10|LILRB1|PRELID1|PYCARD|G0S2|CLEC7A
GO:0010952	GO Biological Processes	positive regulation of peptidase activity	14	-9.91179	-7.49715	BID|CASP1|CTSH|GRN|LGALS9|LYN|S100A8|S100A9|TNF|TNFSF10|PRELID1|PYCARD|VSIR|CLEC7A
GO:0043281	GO Biological Processes	regulation of cysteine-type endopeptidase activity involved in apoptotic process	14	-9.40968	-7.07969	BID|CASP1|CTSH|GPX1|LGALS9|PLAUR|S100A8|S100A9|TNF|TNFSF10|KLF4|PYCARD|CLEC7A|CARD16
GO:0010950	GO Biological Processes	positive regulation of endopeptidase activity	13	-9.38597	-7.06048	BID|CASP1|CTSH|LGALS9|LYN|S100A8|S100A9|TNF|TNFSF10|PRELID1|PYCARD|VSIR|CLEC7A
GO:2001234	GO Biological Processes	negative regulation of apoptotic signaling pathway	14	-9.02637	-6.74753	BCL2A1|BID|GNAI2|GPX1|HMOX1|IL1B|LGALS3|PLAUR|SOD2|TCF7L2|TNF|TNFSF10|ZNF385A|PRELID1
GO:2000116	GO Biological Processes	regulation of cysteine-type endopeptidase activity	14	-8.8098	-6.55823	BID|CASP1|CTSH|GPX1|LGALS9|PLAUR|S100A8|S100A9|TNF|TNFSF10|KLF4|PYCARD|CLEC7A|CARD16
GO:0045862	GO Biological Processes	positive regulation of proteolysis	16	-8.19316	-6.00147	BID|CASP1|CTSH|GRN|IL1B|LGALS9|LYN|S100A8|S100A9|TNF|TNFRSF1B|TNFSF10|PRELID1|PYCARD|VSIR|CLEC7A
GO:0043280	GO Biological Processes	positive regulation of cysteine-type endopeptidase activity involved in apoptotic process	10	-7.4919	-5.35861	BID|CASP1|CTSH|LGALS9|S100A8|S100A9|TNF|TNFSF10|PYCARD|CLEC7A
GO:2001056	GO Biological Processes	positive regulation of cysteine-type endopeptidase activity	10	-6.99232	-4.93291	BID|CASP1|CTSH|LGALS9|S100A8|S100A9|TNF|TNFSF10|PYCARD|CLEC7A
GO:0097193	GO Biological Processes	intrinsic apoptotic signaling pathway	13	-6.86419	-4.8191	BCL2A1|BID|CDKN1A|GPX1|HMOX1|PLAUR|S100A8|S100A9|SOD2|TNF|TNFRSF1B|ZNF385A|PYCARD
GO:0006919	GO Biological Processes	activation of cysteine-type endopeptidase activity involved in apoptotic process	8	-6.78979	-4.76083	BID|CASP1|CTSH|S100A8|S100A9|TNF|TNFSF10|PYCARD
GO:0001836	GO Biological Processes	release of cytochrome c from mitochondria	7	-6.73995	-4.71549	BID|GPX1|PLAUR|SOD2|TNFSF10|PRELID1|PYCARD
GO:0090199	GO Biological Processes	regulation of release of cytochrome c from mitochondria	6	-5.98617	-4.05593	BID|GPX1|PLAUR|TNFSF10|PRELID1|PYCARD
GO:0051345	GO Biological Processes	positive regulation of hydrolase activity	19	-5.67879	-3.79467	RHOC|BID|C5AR1|CASP1|CTSH|GRN|LGALS9|LYN|PSAP|RGS2|S100A8|S100A9|CCL3|TNF|TNFSF10|PRELID1|PYCARD|VSIR|CLEC7A
GO:2001242	GO Biological Processes	regulation of intrinsic apoptotic signaling pathway	9	-5.59279	-3.7158	BCL2A1|BID|GPX1|PLAUR|S100A8|S100A9|SOD2|ZNF385A|PYCARD
GO:0008637	GO Biological Processes	apoptotic mitochondrial changes	8	-5.57052	-3.69759	BID|GPX1|PLAUR|SOD2|TNFSF10|PRELID1|PYCARD|ATG3
GO:2001235	GO Biological Processes	positive regulation of apoptotic signaling pathway	9	-5.30301	-3.46177	BID|CTSH|LGALS9|PLAUR|S100A8|S100A9|TNFSF10|PYCARD|G0S2
GO:0090200	GO Biological Processes	positive regulation of release of cytochrome c from mitochondria	4	-4.2598	-2.54304	BID|PLAUR|TNFSF10|PYCARD
GO:2001243	GO Biological Processes	negative regulation of intrinsic apoptotic signaling pathway	6	-4.17804	-2.46783	BCL2A1|BID|GPX1|PLAUR|SOD2|ZNF385A
GO:1902532	GO Biological Processes	negative regulation of intracellular signal transduction	13	-3.7275	-2.09557	BCL2A1|BID|DUSP6|GNAI2|GPX1|IL1B|LYN|PLAUR|RGS2|SOD2|KLF4|ZNF385A|PYCARD
GO:0010821	GO Biological Processes	regulation of mitochondrion organization	7	-3.51775	-1.91729	BID|TSPO|GPX1|PLAUR|TNFSF10|PRELID1|PYCARD
GO:2001238	GO Biological Processes	positive regulation of extrinsic apoptotic signaling pathway	4	-3.41646	-1.83174	BID|TNFSF10|PYCARD|G0S2
GO:0010822	GO Biological Processes	positive regulation of mitochondrion organization	4	-2.03171	-0.664427	BID|PLAUR|TNFSF10|PYCARD
GO:0006909	GO Biological Processes	phagocytosis	21	-12.7379	-9.93082	AIF1|CD14|FCER1G|FCGR2A|FCGR3A|FCN1|FGR|HCK|IL1B|LRP1|LYN|MYD88|NCF2|SLC11A1|TNF|TYROBP|CD302|RAB31|PYCARD|ATG3|CLEC7A
GO:0060627	GO Biological Processes	regulation of vesicle-mediated transport	22	-10.4949	-7.93854	CD14|FCER1G|FGR|GNAI2|HCK|HMOX1|IL1B|LGALS3|LGALS9|LRP1|LYN|PPT1|SLC11A1|STXBP2|TNF|UNC119|LILRB1|RAB31|PYCARD|ATG3|CLEC7A|PRAM1
GO:0050764	GO Biological Processes	regulation of phagocytosis	11	-9.97905	-7.52412	FCER1G|FGR|HCK|IL1B|LRP1|SLC11A1|TNF|RAB31|PYCARD|ATG3|CLEC7A
GO:0030100	GO Biological Processes	regulation of endocytosis	16	-9.72799	-7.34515	CD14|FCER1G|FGR|HCK|IL1B|LGALS3|LRP1|PPT1|SLC11A1|TNF|UNC119|LILRB1|RAB31|PYCARD|ATG3|CLEC7A
GO:0050766	GO Biological Processes	positive regulation of phagocytosis	8	-7.49838	-5.3593	FCER1G|IL1B|LRP1|SLC11A1|TNF|RAB31|PYCARD|CLEC7A
GO:0045807	GO Biological Processes	positive regulation of endocytosis	10	-6.85754	-4.81712	CD14|FCER1G|IL1B|LRP1|PPT1|SLC11A1|TNF|RAB31|PYCARD|CLEC7A
GO:0006898	GO Biological Processes	receptor-mediated endocytosis	9	-3.33684	-1.76257	CD14|FCER1G|CXCL8|LRP1|PPT1|UNC119|LILRB1|RAB31|CXCL16
GO:0031623	GO Biological Processes	receptor internalization	5	-2.93558	-1.42757	FCER1G|CXCL8|LRP1|LILRB1|RAB31
GO:0043112	GO Biological Processes	receptor metabolic process	6	-2.60337	-1.14844	FCER1G|CXCL8|LRP1|TNF|LILRB1|RAB31
hsa04380	KEGG Pathway	Osteoclast differentiation	14	-12.3737	-9.6055	CSF1R|CYBB|FCGR2A|FCGR3A|IL1B|NCF2|SPI1|TNF|TYROBP|LILRB2|LILRB1|LILRA1|LILRA2|LILRA5
R-HSA-1280218	Reactome Gene Sets	Adaptive Immune System	23	-8.44646	-6.23457	CD14|CTSB|CTSH|CTSS|CYBB|FCGR3A|HLA-DRB5|LYN|MYD88|NCF2|TYROBP|VASP|AP1S2|IFI30|LILRB1|LILRA1|LILRA2|PILRA|RNF130|SIGLEC10|JAML|CD300E|LILRA5
R-HSA-198933	Reactome Gene Sets	Immunoregulatory interactions between a Lymphoid and a non-Lymphoid cell	10	-7.4919	-5.35861	FCGR3A|TYROBP|LILRB1|LILRA1|LILRA2|PILRA|SIGLEC10|JAML|CD300E|LILRA5
GO:0050727	GO Biological Processes	regulation of inflammatory response	23	-12.2157	-9.47164	C5AR1|FCER1G|GPX1|GRN|HCK|IL1B|LYN|MYD88|CFP|S100A8|S100A9|S100A12|CCL3|TNF|TNFRSF1B|ZYX|KLF4|PYCARD|NFKBIZ|CLEC7A|SIGLEC10|NEAT1|LILRA5
GO:0030595	GO Biological Processes	leukocyte chemotaxis	16	-11.2649	-8.64286	AIF1|C5AR1|LYST|CSF3R|FCER1G|IL1B|CXCL8|LGALS3|LGALS9|LYN|S100A8|S100A9|S100A12|CCL3|CXCL16|JAML
GO:0032103	GO Biological Processes	positive regulation of response to external stimulus	18	-10.8371	-8.24915	AIF1|C5AR1|FCER1G|GRN|IL1B|CXCL8|LGALS9|LRP1|MYD88|S100A8|S100A9|S100A12|CCL3|TNF|NFKBIZ|CLEC7A|NEAT1|LILRA5
GO:0060326	GO Biological Processes	cell chemotaxis	17	-10.2595	-7.72534	AIF1|C5AR1|LYST|CSF3R|FCER1G|NR4A1|IL1B|CXCL8|LGALS3|LGALS9|LYN|S100A8|S100A9|S100A12|CCL3|CXCL16|JAML
GO:0050900	GO Biological Processes	leukocyte migration	21	-10.2446	-7.72388	AIF1|C5AR1|LYST|CSF3R|FCER1G|HCK|HMOX1|IL1B|CXCL8|LGALS3|LGALS9|LYN|S100A8|S100A9|S100A12|CCL3|TNF|SLC7A7|PYCARD|CXCL16|JAML
GO:0050729	GO Biological Processes	positive regulation of inflammatory response	13	-10.2078	-7.69489	FCER1G|GRN|IL1B|MYD88|S100A8|S100A9|S100A12|CCL3|TNF|NFKBIZ|CLEC7A|NEAT1|LILRA5
GO:0030593	GO Biological Processes	neutrophil chemotaxis	11	-9.74426	-7.35628	C5AR1|CSF3R|FCER1G|IL1B|CXCL8|LGALS3|S100A8|S100A9|S100A12|CCL3|JAML
GO:1990266	GO Biological Processes	neutrophil migration	11	-9.10886	-6.81779	C5AR1|CSF3R|FCER1G|IL1B|CXCL8|LGALS3|S100A8|S100A9|S100A12|CCL3|JAML
GO:0006935	GO Biological Processes	chemotaxis	22	-9.02137	-6.74653	AIF1|C5AR1|LYST|CSF1R|CSF3R|FCER1G|FPR1|NR4A1|IL1B|CXCL8|LGALS3|LGALS9|LRP1|LYN|PLAUR|S100A8|S100A9|S100A12|CCL3|VASP|CXCL16|JAML
GO:0042330	GO Biological Processes	taxis	22	-8.99646	-6.72952	AIF1|C5AR1|LYST|CSF1R|CSF3R|FCER1G|FPR1|NR4A1|IL1B|CXCL8|LGALS3|LGALS9|LRP1|LYN|PLAUR|S100A8|S100A9|S100A12|CCL3|VASP|CXCL16|JAML
GO:0071621	GO Biological Processes	granulocyte chemotaxis	11	-8.95444	-6.69525	C5AR1|CSF3R|FCER1G|IL1B|CXCL8|LGALS3|S100A8|S100A9|S100A12|CCL3|JAML
GO:0097529	GO Biological Processes	myeloid leukocyte migration	13	-8.45611	-6.24076	AIF1|C5AR1|CSF3R|FCER1G|IL1B|CXCL8|LGALS3|LYN|S100A8|S100A9|S100A12|CCL3|JAML
GO:0097530	GO Biological Processes	granulocyte migration	11	-8.29038	-6.09539	C5AR1|CSF3R|FCER1G|IL1B|CXCL8|LGALS3|S100A8|S100A9|S100A12|CCL3|JAML
GO:0032602	GO Biological Processes	chemokine production	12	-11.8598	-9.17075	AIF1|CSF1R|HMOX1|IL1B|LGALS9|LRP1|S100A8|S100A9|TNF|KLF4|PYCARD|CLEC7A
GO:0030335	GO Biological Processes	positive regulation of cell migration	22	-10.4178	-7.86898	AIF1|RHOC|C5AR1|CSF1R|CTSH|FGR|GNAI2|GRN|HMOX1|IL1B|CXCL8|LGALS3|LGALS9|LRP1|LYN|CCL3|SOD2|TNF|PYCARD|CXCL16|VSIR|CLEC7A
GO:2000147	GO Biological Processes	positive regulation of cell motility	22	-10.0591	-7.57937	AIF1|RHOC|C5AR1|CSF1R|CTSH|FGR|GNAI2|GRN|HMOX1|IL1B|CXCL8|LGALS3|LGALS9|LRP1|LYN|CCL3|SOD2|TNF|PYCARD|CXCL16|VSIR|CLEC7A
GO:0051272	GO Biological Processes	positive regulation of cellular component movement	22	-9.81588	-7.4227	AIF1|RHOC|C5AR1|CSF1R|CTSH|FGR|GNAI2|GRN|HMOX1|IL1B|CXCL8|LGALS3|LGALS9|LRP1|LYN|CCL3|SOD2|TNF|PYCARD|CXCL16|VSIR|CLEC7A
GO:0040017	GO Biological Processes	positive regulation of locomotion	22	-9.63557	-7.26779	AIF1|RHOC|C5AR1|CSF1R|CTSH|FGR|GNAI2|GRN|HMOX1|IL1B|CXCL8|LGALS3|LGALS9|LRP1|LYN|CCL3|SOD2|TNF|PYCARD|CXCL16|VSIR|CLEC7A
GO:0032722	GO Biological Processes	positive regulation of chemokine production	9	-9.58945	-7.23143	AIF1|CSF1R|HMOX1|IL1B|LGALS9|LRP1|TNF|PYCARD|CLEC7A
GO:0032642	GO Biological Processes	regulation of chemokine production	10	-9.52566	-7.17719	AIF1|CSF1R|HMOX1|IL1B|LGALS9|LRP1|TNF|KLF4|PYCARD|CLEC7A
GO:0090197	GO Biological Processes	positive regulation of chemokine secretion	5	-7.34843	-5.25101	AIF1|CSF1R|LRP1|TNF|PYCARD
GO:0070371	GO Biological Processes	ERK1 and ERK2 cascade	14	-7.17048	-5.09122	C5AR1|CSF1R|CTSH|DUSP6|GNAI2|IL1B|LGALS9|LRP1|LYN|NOTCH2|CCL3|TNF|KLF4|PYCARD
GO:0090196	GO Biological Processes	regulation of chemokine secretion	5	-6.90049	-4.85304	AIF1|CSF1R|LRP1|TNF|PYCARD
GO:0090195	GO Biological Processes	chemokine secretion	5	-6.64784	-4.63444	AIF1|CSF1R|LRP1|TNF|PYCARD
GO:0070372	GO Biological Processes	regulation of ERK1 and ERK2 cascade	13	-6.6118	-4.60703	C5AR1|CSF1R|DUSP6|GNAI2|IL1B|LGALS9|LRP1|LYN|NOTCH2|CCL3|TNF|KLF4|PYCARD
GO:0043410	GO Biological Processes	positive regulation of MAPK cascade	16	-5.78225	-3.88329	C5AR1|CSF1R|DUSP6|FPR1|GNAI2|IL1B|LGALS9|LRP1|NOTCH2|PSAP|S100A12|CCL3|TNF|MAPKAPK3|PYCARD|LILRA5
GO:0043408	GO Biological Processes	regulation of MAPK cascade	19	-5.65421	-3.7717	C5AR1|CSF1R|DUSP6|FPR1|GNAI2|IL1B|LGALS9|LRP1|LYN|NOTCH2|PSAP|RGS2|S100A12|CCL3|TNF|MAPKAPK3|KLF4|PYCARD|LILRA5
GO:0070374	GO Biological Processes	positive regulation of ERK1 and ERK2 cascade	9	-4.63296	-2.8697	C5AR1|CSF1R|GNAI2|LGALS9|LRP1|NOTCH2|CCL3|TNF|PYCARD
GO:0080135	GO Biological Processes	regulation of cellular response to stress	16	-4.11155	-2.41734	BID|GPX1|GRN|HSBP1|IL1B|LGALS9|LRP1|LYN|PSAP|SOD2|TNF|IER3|KLF4|NAMPT|ZNF385A|PYCARD
GO:0002683	GO Biological Processes	negative regulation of immune system process	21	-10.8813	-8.28507	CD14|CD68|FCER1G|GPX1|GRN|HMOX1|LGALS3|LGALS9|LYN|MNDA|CCL3|TNF|TYROBP|LST1|MAFB|LILRB2|LILRB1|FGL2|LILRA2|TMEM176B|VSIR
GO:0002521	GO Biological Processes	leukocyte differentiation	20	-9.1804	-6.88517	CSF1R|FCER1G|LGALS3|LGALS9|LYN|NOTCH2|POU2F2|CCL3|SPI1|TNF|TYROBP|MAFB|LILRB2|TCIRG1|LILRB1|FGL2|PRELID1|TMEM176B|VSIR|NFKBIZ
GO:1902105	GO Biological Processes	regulation of leukocyte differentiation	15	-8.99845	-6.72952	LGALS3|LGALS9|LYN|NOTCH2|CCL3|TNF|TYROBP|MAFB|LILRB2|LILRB1|FGL2|PRELID1|TMEM176B|VSIR|NFKBIZ
GO:0002573	GO Biological Processes	myeloid leukocyte differentiation	12	-7.62032	-5.46642	CSF1R|FCER1G|LGALS9|LYN|NOTCH2|CCL3|SPI1|TNF|TYROBP|MAFB|TCIRG1|LILRB1
GO:0030316	GO Biological Processes	osteoclast differentiation	9	-7.56282	-5.41491	CSF1R|FCER1G|NOTCH2|CCL3|TNF|TYROBP|MAFB|TCIRG1|LILRB1
GO:1903706	GO Biological Processes	regulation of hemopoiesis	17	-7.33439	-5.24223	CSF3R|LGALS3|LGALS9|LYN|NOTCH2|CCL3|SPI1|TNF|TYROBP|MAFB|LILRB2|LILRB1|FGL2|PRELID1|TMEM176B|VSIR|NFKBIZ
GO:0030099	GO Biological Processes	myeloid cell differentiation	15	-6.56466	-4.56836	CSF1R|CSF3R|FCER1G|LGALS3|LGALS9|LYN|NOTCH2|CCL3|SPI1|TNF|TYROBP|MAFB|TCIRG1|LILRB1|ZNF385A
GO:0045670	GO Biological Processes	regulation of osteoclast differentiation	6	-5.2403	-3.40225	NOTCH2|CCL3|TNF|TYROBP|MAFB|LILRB1
GO:0045637	GO Biological Processes	regulation of myeloid cell differentiation	10	-4.92238	-3.12334	CSF3R|LGALS3|LYN|NOTCH2|CCL3|SPI1|TNF|TYROBP|MAFB|LILRB1
GO:0002761	GO Biological Processes	regulation of myeloid leukocyte differentiation	7	-4.72501	-2.95308	LYN|NOTCH2|CCL3|TNF|TYROBP|MAFB|LILRB1
GO:1902106	GO Biological Processes	negative regulation of leukocyte differentiation	6	-4.05751	-2.37261	LYN|CCL3|MAFB|LILRB1|FGL2|TMEM176B
GO:0002762	GO Biological Processes	negative regulation of myeloid leukocyte differentiation	4	-3.45108	-1.8631	LYN|CCL3|MAFB|LILRB1
GO:1903707	GO Biological Processes	negative regulation of hemopoiesis	6	-3.10018	-1.5768	LYN|CCL3|MAFB|LILRB1|FGL2|TMEM176B
GO:0045671	GO Biological Processes	negative regulation of osteoclast differentiation	3	-3.0606	-1.53933	CCL3|MAFB|LILRB1
GO:0045638	GO Biological Processes	negative regulation of myeloid cell differentiation	4	-2.41422	-0.991878	LYN|CCL3|MAFB|LILRB1
GO:0019221	GO Biological Processes	cytokine-mediated signaling pathway	26	-10.1825	-7.67646	CASP1|CDKN1A|CSF1R|CSF3R|EREG|FCER1G|FPR1|HCK|HLA-DRB5|HMOX1|IL1B|CXCL8|MYD88|OAS1|CCL3|SOD2|SPI1|TALDO1|TIMP1|TNF|TNFRSF1B|IFITM3|IFI30|TNFSF13B|PYCARD|CARD16
R-HSA-449147	Reactome Gene Sets	Signaling by Interleukins	23	-9.94072	-7.50359	CASP1|CDKN1A|CSF1R|CSF3R|DUSP6|EREG|FPR1|HCK|HMOX1|IL1B|CXCL8|LGALS9|LYN|MYD88|S100A12|CCL3|SOD2|STXBP2|TALDO1|TIMP1|TNF|TNFRSF1B|MAPKAPK3
hsa04142	KEGG Pathway	Lysosome	12	-10.1662	-7.66689	ASAH1|CD68|CTSB|CTSH|CTSS|PPT1|PSAP|SLC11A1|AP1S2|ATP6V0D1|TCIRG1|NPC2
GO:0007035	GO Biological Processes	vacuolar acidification	5	-6.5322	-4.54009	GRN|PPT1|SLC11A1|ATP6V0D1|TCIRG1
R-HSA-1222556	Reactome Gene Sets	ROS and RNS production in phagocytes	5	-5.30128	-3.46177	CYBB|NCF2|SLC11A1|ATP6V0D1|TCIRG1
GO:0051452	GO Biological Processes	intracellular pH reduction	5	-4.5435	-2.79708	GRN|PPT1|SLC11A1|ATP6V0D1|TCIRG1
GO:0045851	GO Biological Processes	pH reduction	5	-4.46146	-2.7209	GRN|PPT1|SLC11A1|ATP6V0D1|TCIRG1
GO:0051453	GO Biological Processes	regulation of intracellular pH	5	-3.50549	-1.90587	GRN|PPT1|SLC11A1|ATP6V0D1|TCIRG1
GO:0030641	GO Biological Processes	regulation of cellular pH	5	-3.36672	-1.78685	GRN|PPT1|SLC11A1|ATP6V0D1|TCIRG1
GO:0006885	GO Biological Processes	regulation of pH	5	-3.19721	-1.65359	GRN|PPT1|SLC11A1|ATP6V0D1|TCIRG1
GO:0055067	GO Biological Processes	monovalent inorganic cation homeostasis	6	-3.11484	-1.58862	GNAI2|GRN|PPT1|SLC11A1|ATP6V0D1|TCIRG1
GO:0030004	GO Biological Processes	cellular monovalent inorganic cation homeostasis	5	-3.00631	-1.49339	GRN|PPT1|SLC11A1|ATP6V0D1|TCIRG1
hsa05120	KEGG Pathway	Epithelial cell signaling in Helicobacter pylori infection	4	-2.87644	-1.37975	CXCL8|LYN|ATP6V0D1|TCIRG1
GO:0090382	GO Biological Processes	phagosome maturation	3	-2.44247	-1.01727	ATP6V0D1|TCIRG1|RAB31
GO:0098542	GO Biological Processes	defense response to other organism	22	-10.0156	-7.5484	C5AR1|LYST|FCER1G|FGR|GRN|IL1B|LYZ|MYD88|OAS1|CFP|S100A8|S100A9|S100A12|SLC11A1|TNF|IFITM3|LILRB1|FGL2|COTL1|PYCARD|CLEC7A|MPEG1
GO:0042742	GO Biological Processes	defense response to bacterium	15	-7.85184	-5.67946	C5AR1|LYST|FCER1G|FGR|GRN|LYZ|MYD88|CFP|S100A8|S100A9|S100A12|SLC11A1|TNF|PYCARD|MPEG1
GO:0050830	GO Biological Processes	defense response to Gram-positive bacterium	6	-4.0342	-2.35541	C5AR1|FGR|LYZ|MYD88|TNF|MPEG1
GO:0050829	GO Biological Processes	defense response to Gram-negative bacterium	4	-2.41422	-0.991878	LYZ|SLC11A1|PYCARD|MPEG1
GO:0150076	GO Biological Processes	neuroinflammatory response	10	-9.91918	-7.49901	AIF1|C5AR1|GRN|IL1B|LRP1|CCL3|TNF|TNFRSF1B|TYROBP|NAMPT
GO:0061900	GO Biological Processes	glial cell activation	9	-9.58945	-7.23143	AIF1|C5AR1|GRN|IL1B|LRP1|CCL3|TNF|TYROBP|NAMPT
GO:0001774	GO Biological Processes	microglial cell activation	7	-7.37779	-5.26693	AIF1|C5AR1|GRN|CCL3|TNF|TYROBP|NAMPT
GO:0002269	GO Biological Processes	leukocyte activation involved in inflammatory response	7	-7.37779	-5.26693	AIF1|C5AR1|GRN|CCL3|TNF|TYROBP|NAMPT
GO:0042116	GO Biological Processes	macrophage activation	8	-6.45296	-4.47915	AIF1|C5AR1|GRN|CCL3|SLC11A1|TNF|TYROBP|NAMPT
GO:0070997	GO Biological Processes	neuron death	12	-5.17689	-3.3467	BID|C5AR1|GRN|HMOX1|LRP1|PPT1|CCL3|SOD2|TNF|TNFRSF1B|TYROBP|NAMPT
GO:0051402	GO Biological Processes	neuron apoptotic process	10	-5.12299	-3.29786	BID|C5AR1|GRN|HMOX1|LRP1|PPT1|CCL3|SOD2|TNF|TYROBP
GO:0043523	GO Biological Processes	regulation of neuron apoptotic process	9	-4.74552	-2.96728	C5AR1|GRN|HMOX1|LRP1|PPT1|CCL3|SOD2|TNF|TYROBP
GO:1901214	GO Biological Processes	regulation of neuron death	10	-4.12369	-2.42843	C5AR1|GRN|HMOX1|LRP1|PPT1|CCL3|SOD2|TNF|TNFRSF1B|TYROBP
GO:0043524	GO Biological Processes	negative regulation of neuron apoptotic process	6	-3.22074	-1.66739	C5AR1|GRN|HMOX1|LRP1|PPT1|SOD2
GO:1901215	GO Biological Processes	negative regulation of neuron death	7	-3.17102	-1.63473	C5AR1|GRN|HMOX1|LRP1|PPT1|SOD2|TNFRSF1B
GO:0043525	GO Biological Processes	positive regulation of neuron apoptotic process	4	-3.16478	-1.62922	GRN|CCL3|TNF|TYROBP
GO:1901216	GO Biological Processes	positive regulation of neuron death	4	-2.36394	-0.948206	GRN|CCL3|TNF|TYROBP
GO:0032637	GO Biological Processes	interleukin-8 production	10	-9.52566	-7.17719	CD14|FCN1|IL1B|LGALS9|MYD88|TNF|KLF4|LILRA2|PYCARD|CLEC7A
GO:0032757	GO Biological Processes	positive regulation of interleukin-8 production	8	-8.76511	-6.52103	CD14|FCN1|IL1B|LGALS9|MYD88|TNF|PYCARD|CLEC7A
GO:0032677	GO Biological Processes	regulation of interleukin-8 production	9	-8.6148	-6.38533	CD14|FCN1|IL1B|LGALS9|MYD88|TNF|KLF4|PYCARD|CLEC7A
GO:0032609	GO Biological Processes	interferon-gamma production	10	-8.14366	-5.9585	CD14|IL1B|LGALS9|SLC11A1|TNF|TCIRG1|LILRB1|PYCARD|VSIR|CLEC7A
GO:0032649	GO Biological Processes	regulation of interferon-gamma production	9	-7.40846	-5.28933	CD14|IL1B|LGALS9|SLC11A1|TNF|LILRB1|PYCARD|VSIR|CLEC7A
GO:0032729	GO Biological Processes	positive regulation of interferon-gamma production	7	-6.44545	-4.47364	CD14|IL1B|LGALS9|SLC11A1|TNF|PYCARD|CLEC7A
GO:2000484	GO Biological Processes	positive regulation of interleukin-8 secretion	4	-5.52692	-3.65557	CD14|FCN1|LGALS9|PYCARD
GO:0002532	GO Biological Processes	production of molecular mediator involved in inflammatory response	6	-4.8388	-3.04898	FCER1G|GRN|LYN|MYD88|PYCARD|CLEC7A
GO:2000482	GO Biological Processes	regulation of interleukin-8 secretion	4	-4.58369	-2.82894	CD14|FCN1|LGALS9|PYCARD
GO:0072606	GO Biological Processes	interleukin-8 secretion	4	-4.31958	-2.59278	CD14|FCN1|LGALS9|PYCARD
GO:0071639	GO Biological Processes	positive regulation of monocyte chemotactic protein-1 production	3	-4.15081	-2.45239	IL1B|LGALS9|CLEC7A
GO:0071605	GO Biological Processes	monocyte chemotactic protein-1 production	3	-3.59496	-1.98167	IL1B|LGALS9|CLEC7A
GO:0071637	GO Biological Processes	regulation of monocyte chemotactic protein-1 production	3	-3.59496	-1.98167	IL1B|LGALS9|CLEC7A
R-HSA-5621481	Reactome Gene Sets	C-type lectin receptors (CLRs)	5	-2.48451	-1.05134	FCER1G|IL1B|LYN|PYCARD|CLEC7A
GO:1900015	GO Biological Processes	regulation of cytokine production involved in inflammatory response	3	-2.38765	-0.969704	MYD88|PYCARD|CLEC7A
GO:0002534	GO Biological Processes	cytokine production involved in inflammatory response	3	-2.31018	-0.902088	MYD88|PYCARD|CLEC7A
hsa05152	KEGG Pathway	Tuberculosis	13	-9.35584	-7.0348	BID|CD14|CTSS|FCER1G|FCGR2A|FCGR3A|HLA-DRB5|IL1B|MYD88|TNF|ATP6V0D1|TCIRG1|CLEC7A
hsa04145	KEGG Pathway	Phagosome	10	-6.85754	-4.81712	CD14|CTSS|CYBB|FCGR2A|FCGR3A|HLA-DRB5|NCF2|ATP6V0D1|TCIRG1|CLEC7A
hsa05140	KEGG Pathway	Leishmaniasis	7	-6.09655	-4.1572	FCGR2A|FCGR3A|HLA-DRB5|IL1B|MYD88|NCF2|TNF
hsa05150	KEGG Pathway	Staphylococcus aureus infection	6	-5.58369	-3.70918	C5AR1|CFD|FCGR2A|FCGR3A|FPR1|HLA-DRB5
hsa05322	KEGG Pathway	Systemic lupus erythematosus	5	-2.60704	-1.15151	FCGR2A|FCGR3A|HLA-DRB5|TNF|MACROH2A1
GO:0009611	GO Biological Processes	response to wounding	23	-9.32263	-7.00601	AIF1|ANXA5|RHOC|TSPO|CDKN1A|EREG|FCER1G|GPX1|GRN|HMOX1|LRP1|LYN|NINJ1|SERPINA1|PLAUR|S100A8|SLC11A1|TIMP1|TYROBP|KLF4|CLEC7A|SIGLEC10|JAML
GO:1903034	GO Biological Processes	regulation of response to wounding	10	-6.25081	-4.29265	ANXA5|CDKN1A|FCER1G|GRN|LRP1|LYN|PLAUR|KLF4|CLEC7A|SIGLEC10
GO:0042060	GO Biological Processes	wound healing	16	-5.5919	-3.7158	ANXA5|RHOC|CDKN1A|EREG|FCER1G|GPX1|HMOX1|LYN|NINJ1|SERPINA1|PLAUR|S100A8|SLC11A1|TIMP1|CLEC7A|JAML
GO:0061041	GO Biological Processes	regulation of wound healing	6	-3.20525	-1.65781	ANXA5|CDKN1A|FCER1G|LYN|PLAUR|CLEC7A
GO:0030193	GO Biological Processes	regulation of blood coagulation	4	-2.63626	-1.17526	ANXA5|FCER1G|LYN|PLAUR
GO:1900046	GO Biological Processes	regulation of hemostasis	4	-2.61633	-1.15959	ANXA5|FCER1G|LYN|PLAUR
GO:0050818	GO Biological Processes	regulation of coagulation	4	-2.53934	-1.09631	ANXA5|FCER1G|LYN|PLAUR
GO:1903035	GO Biological Processes	negative regulation of response to wounding	4	-2.4314	-1.00676	ANXA5|CDKN1A|PLAUR|SIGLEC10
GO:0034341	GO Biological Processes	response to interferon-gamma	13	-8.79026	-6.54245	AIF1|CASP1|HCK|HLA-DRB5|LGALS9|OAS1|CCL3|SLC11A1|STXBP2|ZYX|IFITM3|IFI30|CXCL16
GO:0071346	GO Biological Processes	cellular response to interferon-gamma	10	-6.22858	-4.27235	AIF1|CASP1|HCK|HLA-DRB5|LGALS9|OAS1|CCL3|STXBP2|ZYX|IFI30
GO:0060333	GO Biological Processes	interferon-gamma-mediated signaling pathway	4	-2.41422	-0.991878	HCK|HLA-DRB5|OAS1|IFI30
GO:0043900	GO Biological Processes	regulation of multi-organism process	17	-8.34522	-6.14355	CSF1R|FCN1|GRN|IL1B|CXCL8|LGALS9|OAS1|CCL3|TIMP1|TNF|IFITM3|LILRB1|FGL2|LILRA2|PYCARD|CLEC7A|CARD16
GO:0043901	GO Biological Processes	negative regulation of multi-organism process	9	-5.46526	-3.60015	FCN1|OAS1|CCL3|TIMP1|TNF|IFITM3|FGL2|LILRA2|CARD16
GO:0050792	GO Biological Processes	regulation of viral process	8	-3.94779	-2.28193	CSF1R|FCN1|CXCL8|LGALS9|OAS1|CCL3|TNF|IFITM3
GO:0043903	GO Biological Processes	regulation of symbiosis, encompassing mutualism through parasitism	8	-3.75349	-2.11975	CSF1R|FCN1|CXCL8|LGALS9|OAS1|CCL3|TNF|IFITM3
GO:1903900	GO Biological Processes	regulation of viral life cycle	6	-3.18988	-1.64921	FCN1|CXCL8|LGALS9|OAS1|TNF|IFITM3
GO:0048525	GO Biological Processes	negative regulation of viral process	5	-3.17714	-1.63866	FCN1|OAS1|CCL3|TNF|IFITM3
GO:0046596	GO Biological Processes	regulation of viral entry into host cell	3	-2.92488	-1.42015	FCN1|LGALS9|IFITM3
GO:0030260	GO Biological Processes	entry into host cell	5	-2.57898	-1.12944	CTSB|FCN1|CXCL8|LGALS9|IFITM3
GO:0044409	GO Biological Processes	entry into host	5	-2.57898	-1.12944	CTSB|FCN1|CXCL8|LGALS9|IFITM3
GO:0051806	GO Biological Processes	entry into cell of other organism involved in symbiotic interaction	5	-2.57898	-1.12944	CTSB|FCN1|CXCL8|LGALS9|IFITM3
GO:0051828	GO Biological Processes	entry into other organism involved in symbiotic interaction	5	-2.57898	-1.12944	CTSB|FCN1|CXCL8|LGALS9|IFITM3
GO:1903901	GO Biological Processes	negative regulation of viral life cycle	4	-2.52075	-1.08413	FCN1|OAS1|TNF|IFITM3
GO:0045069	GO Biological Processes	regulation of viral genome replication	4	-2.34759	-0.935153	CXCL8|OAS1|TNF|IFITM3
GO:0045071	GO Biological Processes	negative regulation of viral genome replication	3	-2.08563	-0.703811	OAS1|TNF|IFITM3
GO:0019058	GO Biological Processes	viral life cycle	7	-2.06413	-0.687371	CTSB|FCN1|CXCL8|LGALS9|OAS1|TNF|IFITM3
GO:0002697	GO Biological Processes	regulation of immune effector process	18	-8.337	-6.13868	C5AR1|FCER1G|FGR|GRN|HMOX1|IL1B|LGALS3|LGALS9|LYN|CFP|STXBP2|TNF|TNFRSF1B|LILRB1|FGL2|PYCARD|NFKBIZ|PRAM1
GO:0043300	GO Biological Processes	regulation of leukocyte degranulation	7	-7.3134	-5.22385	FCER1G|FGR|HMOX1|LGALS9|LYN|STXBP2|PRAM1
GO:0043304	GO Biological Processes	regulation of mast cell degranulation	6	-6.91121	-4.8614	FCER1G|FGR|HMOX1|LGALS9|LYN|STXBP2
GO:0033006	GO Biological Processes	regulation of mast cell activation involved in immune response	6	-6.83205	-4.79537	FCER1G|FGR|HMOX1|LGALS9|LYN|STXBP2
GO:0002886	GO Biological Processes	regulation of myeloid leukocyte mediated immunity	7	-6.79225	-4.76102	FCER1G|FGR|HMOX1|LGALS9|LYN|STXBP2|PRAM1
GO:0002703	GO Biological Processes	regulation of leukocyte mediated immunity	11	-6.66807	-4.64822	FCER1G|FGR|HMOX1|IL1B|LGALS9|LYN|STXBP2|TNF|TNFRSF1B|LILRB1|PRAM1
GO:0045576	GO Biological Processes	mast cell activation	7	-6.49239	-4.50851	FCER1G|FGR|HMOX1|LGALS9|LYN|S100A12|STXBP2
GO:0033003	GO Biological Processes	regulation of mast cell activation	6	-6.15664	-4.20611	FCER1G|FGR|HMOX1|LGALS9|LYN|STXBP2
GO:0043303	GO Biological Processes	mast cell degranulation	6	-5.87895	-3.96114	FCER1G|FGR|HMOX1|LGALS9|LYN|STXBP2
GO:0002279	GO Biological Processes	mast cell activation involved in immune response	6	-5.8271	-3.91796	FCER1G|FGR|HMOX1|LGALS9|LYN|STXBP2
GO:0002448	GO Biological Processes	mast cell mediated immunity	6	-5.77637	-3.87908	FCER1G|FGR|HMOX1|LGALS9|LYN|STXBP2
GO:0002699	GO Biological Processes	positive regulation of immune effector process	10	-5.45826	-3.5947	FCER1G|FGR|HMOX1|IL1B|LGALS9|LYN|STXBP2|TNF|LILRB1|NFKBIZ
GO:0032418	GO Biological Processes	lysosome localization	6	-4.77286	-2.9908	FCER1G|FGR|HMOX1|LGALS9|LYN|STXBP2
GO:1903305	GO Biological Processes	regulation of regulated secretory pathway	8	-4.69615	-2.92547	FCER1G|FGR|GNAI2|HMOX1|LGALS9|LYN|STXBP2|PRAM1
GO:0017157	GO Biological Processes	regulation of exocytosis	8	-3.76687	-2.12578	FCER1G|FGR|GNAI2|HMOX1|LGALS9|LYN|STXBP2|PRAM1
GO:0001776	GO Biological Processes	leukocyte homeostasis	5	-3.45802	-1.86458	FCER1G|LGALS9|LYN|TCIRG1|TNFSF13B
GO:0048872	GO Biological Processes	homeostasis of number of cells	8	-3.44091	-1.85375	FCER1G|HMOX1|LGALS9|LYN|SPI1|MAFB|TCIRG1|TNFSF13B
GO:0002260	GO Biological Processes	lymphocyte homeostasis	4	-3.02665	-1.50887	LGALS9|LYN|TCIRG1|TNFSF13B
GO:0140029	GO Biological Processes	exocytic process	4	-2.5773	-1.12836	FCER1G|LYN|STXBP2|STX11
GO:0006836	GO Biological Processes	neurotransmitter transport	7	-2.50589	-1.07029	FCER1G|GLUL|LYN|PPT1|RGS2|STX11|LILRB1
GO:0002262	GO Biological Processes	myeloid cell homeostasis	5	-2.40787	-0.987144	FCER1G|HMOX1|LYN|SPI1|MAFB
GO:0045646	GO Biological Processes	regulation of erythrocyte differentiation	3	-2.3354	-0.923507	LYN|SPI1|MAFB
GO:0019882	GO Biological Processes	antigen processing and presentation	13	-8.09841	-5.91648	CD68|CTSH|CTSS|CYBB|FCER1G|HLA-DRB5|NCF2|SLC11A1|AP1S2|LILRB2|IFI30|FGL2|PYCARD
GO:0048002	GO Biological Processes	antigen processing and presentation of peptide antigen	9	-5.09311	-3.27221	CTSS|CYBB|FCER1G|HLA-DRB5|NCF2|SLC11A1|AP1S2|IFI30|PYCARD
GO:0002495	GO Biological Processes	antigen processing and presentation of peptide antigen via MHC class II	6	-4.10491	-2.4159	CTSS|FCER1G|HLA-DRB5|AP1S2|IFI30|PYCARD
GO:0002504	GO Biological Processes	antigen processing and presentation of peptide or polysaccharide antigen via MHC class II	6	-4.08108	-2.39413	CTSS|FCER1G|HLA-DRB5|AP1S2|IFI30|PYCARD
hsa04612	KEGG Pathway	Antigen processing and presentation	5	-3.68223	-2.05212	CTSB|CTSS|HLA-DRB5|TNF|IFI30
R-HSA-2132295	Reactome Gene Sets	MHC class II antigen presentation	6	-3.63436	-2.0123	CTSB|CTSH|CTSS|HLA-DRB5|AP1S2|IFI30
GO:0002478	GO Biological Processes	antigen processing and presentation of exogenous peptide antigen	7	-3.62134	-2.00104	CTSS|CYBB|FCER1G|HLA-DRB5|NCF2|AP1S2|IFI30
GO:0019884	GO Biological Processes	antigen processing and presentation of exogenous antigen	7	-3.51775	-1.91729	CTSS|CYBB|FCER1G|HLA-DRB5|NCF2|AP1S2|IFI30
GO:0019886	GO Biological Processes	antigen processing and presentation of exogenous peptide antigen via MHC class II	5	-3.19721	-1.65359	CTSS|FCER1G|HLA-DRB5|AP1S2|IFI30
R-HSA-2029481	Reactome Gene Sets	FCGR activation	5	-7.91987	-5.74433	FCGR2A|FCGR3A|FGR|HCK|LYN
hsa04611	KEGG Pathway	Platelet activation	6	-3.63436	-2.0123	FCER1G|FCGR2A|GNAI2|LYN|TBXAS1|VASP
hsa04062	KEGG Pathway	Chemokine signaling pathway	7	-3.51775	-1.91729	FGR|GNAI2|HCK|CXCL8|LYN|CCL3|CXCL16
R-HSA-2029480	Reactome Gene Sets	Fcgamma receptor (FCGR) dependent phagocytosis	5	-3.45802	-1.86458	FCGR2A|FCGR3A|FGR|HCK|LYN
hsa04666	KEGG Pathway	Fc gamma R-mediated phagocytosis	5	-3.34462	-1.76819	FCGR2A|FCGR3A|HCK|LYN|VASP
GO:0038094	GO Biological Processes	Fc-gamma receptor signaling pathway	6	-3.30008	-1.73523	FCER1G|FCGR2A|FCGR3A|FGR|HCK|LYN
GO:0002431	GO Biological Processes	Fc receptor mediated stimulatory signaling pathway	6	-3.25209	-1.69722	FCER1G|FCGR2A|FCGR3A|FGR|HCK|LYN
GO:0048015	GO Biological Processes	phosphatidylinositol-mediated signaling	6	-2.75441	-1.27656	CSF1R|FGR|LYN|TNF|IER3|KLF4
GO:0014066	GO Biological Processes	regulation of phosphatidylinositol 3-kinase signaling	5	-2.73982	-1.26388	FGR|LYN|TNF|IER3|KLF4
GO:0048017	GO Biological Processes	inositol lipid-mediated signaling	6	-2.7184	-1.24624	CSF1R|FGR|LYN|TNF|IER3|KLF4
GO:0038083	GO Biological Processes	peptidyl-tyrosine autophosphorylation	3	-2.65855	-1.19509	FGR|HCK|LYN
GO:0002433	GO Biological Processes	immune response-regulating cell surface receptor signaling pathway involved in phagocytosis	5	-2.5243	-1.08536	FCGR2A|FCGR3A|FGR|HCK|LYN
GO:0038096	GO Biological Processes	Fc-gamma receptor signaling pathway involved in phagocytosis	5	-2.5243	-1.08536	FCGR2A|FCGR3A|FGR|HCK|LYN
GO:0014065	GO Biological Processes	phosphatidylinositol 3-kinase signaling	5	-2.40787	-0.987144	FGR|LYN|TNF|IER3|KLF4
GO:0043551	GO Biological Processes	regulation of phosphatidylinositol 3-kinase activity	3	-2.16993	-0.775702	FGR|LYN|KLF4
GO:0038093	GO Biological Processes	Fc receptor signaling pathway	6	-2.14729	-0.75827	FCER1G|FCGR2A|FCGR3A|FGR|HCK|LYN
hsa04621	KEGG Pathway	NOD-like receptor signaling pathway	11	-7.47468	-5.34711	CASP1|CTSB|CYBB|IL1B|CXCL8|MYD88|OAS1|TNF|NAMPT|PYCARD|CARD16
hsa05133	KEGG Pathway	Pertussis	8	-7.21337	-5.129	CASP1|CD14|GNAI2|IL1B|CXCL8|MYD88|TNF|PYCARD
hsa05134	KEGG Pathway	Legionellosis	7	-6.95535	-4.89836	CASP1|CD14|IL1B|CXCL8|MYD88|TNF|PYCARD
hsa04064	KEGG Pathway	NF-kappa B signaling pathway	8	-6.45296	-4.47915	BCL2A1|CD14|IL1B|CXCL8|LYN|MYD88|TNF|TNFSF13B
GO:0007249	GO Biological Processes	I-kappaB kinase/NF-kappaB signaling	12	-6.33723	-4.37328	RHOC|CASP1|CD14|HMOX1|IL1B|LGALS9|MYD88|S100A12|TNF|TNFSF10|PYCARD|CARD16
GO:0043123	GO Biological Processes	positive regulation of I-kappaB kinase/NF-kappaB signaling	10	-6.16275	-4.21033	RHOC|CASP1|HMOX1|IL1B|LGALS9|MYD88|S100A12|TNF|TNFSF10|CARD16
GO:0043122	GO Biological Processes	regulation of I-kappaB kinase/NF-kappaB signaling	11	-6.021	-4.08714	RHOC|CASP1|HMOX1|IL1B|LGALS9|MYD88|S100A12|TNF|TNFSF10|PYCARD|CARD16
GO:0051092	GO Biological Processes	positive regulation of NF-kappaB transcription factor activity	9	-5.93635	-4.01679	IL1B|LGALS9|MYD88|S100A8|S100A9|S100A12|TNF|PYCARD|CARD16
GO:0051090	GO Biological Processes	regulation of DNA-binding transcription factor activity	14	-5.63959	-3.75869	HCK|HMOX1|IL1B|LGALS9|MYD88|S100A8|S100A9|S100A12|SGK1|TCF7L2|TNF|KLF4|PYCARD|CARD16
hsa05132	KEGG Pathway	Salmonella infection	7	-5.61142	-3.73213	CASP1|CD14|IL1B|CXCL8|MYD88|CCL3|PYCARD
hsa05164	KEGG Pathway	Influenza A	9	-5.42389	-3.56494	CASP1|HLA-DRB5|IL1B|CXCL8|MYD88|OAS1|TNF|TNFSF10|PYCARD
hsa05144	KEGG Pathway	Malaria	5	-4.62917	-2.86713	IL1B|CXCL8|LRP1|MYD88|TNF
hsa05142	KEGG Pathway	Chagas disease (American trypanosomiasis)	6	-4.08108	-2.39413	GNAI2|IL1B|CXCL8|MYD88|CCL3|TNF
hsa04620	KEGG Pathway	Toll-like receptor signaling pathway	6	-4.0342	-2.35541	CD14|IL1B|CXCL8|MYD88|CCL3|TNF
GO:0051091	GO Biological Processes	positive regulation of DNA-binding transcription factor activity	9	-4.01237	-2.33559	IL1B|LGALS9|MYD88|S100A8|S100A9|S100A12|TNF|PYCARD|CARD16
hsa05168	KEGG Pathway	Herpes simplex infection	7	-3.47479	-1.87937	HLA-DRB5|IL1B|MYD88|OAS1|CFP|TNF|PILRA
hsa05143	KEGG Pathway	African trypanosomiasis	3	-2.72862	-1.2552	IL1B|MYD88|TNF
GO:0070555	GO Biological Processes	response to interleukin-1	6	-2.46433	-1.03573	IL1B|CXCL8|LGALS9|MYD88|CCL3|PYCARD
hsa05145	KEGG Pathway	Toxoplasmosis	4	-2.08365	-0.702846	GNAI2|HLA-DRB5|MYD88|TNF
GO:0071347	GO Biological Processes	cellular response to interleukin-1	5	-2.06438	-0.687371	IL1B|CXCL8|MYD88|CCL3|PYCARD
R-HSA-6783783	Reactome Gene Sets	Interleukin-10 signaling	7	-7.4437	-5.32177	FPR1|IL1B|CXCL8|CCL3|TIMP1|TNF|TNFRSF1B
GO:2000379	GO Biological Processes	positive regulation of reactive oxygen species metabolic process	9	-7.37094	-5.2628	AIF1|TSPO|CDKN1A|GNAI2|IL1B|TNF|TYROBP|KLF4|CLEC7A
GO:0045410	GO Biological Processes	positive regulation of interleukin-6 biosynthetic process	5	-7.34843	-5.25101	EREG|IL1B|TNF|TYROBP|CLEC7A
GO:0072593	GO Biological Processes	reactive oxygen species metabolic process	13	-6.95176	-4.89806	AIF1|TSPO|CDKN1A|CYBB|GNAI2|GPX1|IL1B|NCF2|SOD2|TNF|TYROBP|KLF4|CLEC7A
GO:0042035	GO Biological Processes	regulation of cytokine biosynthetic process	9	-6.95025	-4.89806	CYBB|EREG|HMOX1|IL1B|TNF|TYROBP|KLF4|LILRB1|CLEC7A
GO:0042089	GO Biological Processes	cytokine biosynthetic process	9	-6.66602	-4.64822	CYBB|EREG|HMOX1|IL1B|TNF|TYROBP|KLF4|LILRB1|CLEC7A
GO:0042107	GO Biological Processes	cytokine metabolic process	9	-6.63588	-4.6264	CYBB|EREG|HMOX1|IL1B|TNF|TYROBP|KLF4|LILRB1|CLEC7A
GO:0042108	GO Biological Processes	positive regulation of cytokine biosynthetic process	7	-6.35393	-4.38803	CYBB|EREG|HMOX1|IL1B|TNF|TYROBP|CLEC7A
GO:0014002	GO Biological Processes	astrocyte development	6	-6.21628	-4.26195	C5AR1|GRN|IL1B|LRP1|S100A8|TNF
GO:0014015	GO Biological Processes	positive regulation of gliogenesis	7	-6.05594	-4.11842	TSPO|IL1B|LRP1|LYN|CCL3|TNF|TNFRSF1B
GO:0048143	GO Biological Processes	astrocyte activation	5	-5.94847	-4.02359	C5AR1|GRN|IL1B|LRP1|TNF
GO:0045408	GO Biological Processes	regulation of interleukin-6 biosynthetic process	5	-5.86549	-3.95463	EREG|IL1B|TNF|TYROBP|CLEC7A
GO:0042226	GO Biological Processes	interleukin-6 biosynthetic process	5	-5.78576	-3.88512	EREG|IL1B|TNF|TYROBP|CLEC7A
GO:0042063	GO Biological Processes	gliogenesis	11	-5.17609	-3.3467	TSPO|C5AR1|CSF1R|GRN|IL1B|LRP1|LYN|S100A8|CCL3|TNF|TNFRSF1B
GO:0045428	GO Biological Processes	regulation of nitric oxide biosynthetic process	6	-5.16186	-3.3339	AIF1|TSPO|IL1B|TNF|KLF4|CLEC7A
GO:0060252	GO Biological Processes	positive regulation of glial cell proliferation	4	-5.08317	-3.26506	TSPO|IL1B|LYN|TNF
GO:0150077	GO Biological Processes	regulation of neuroinflammatory response	5	-5.01517	-3.20669	GRN|IL1B|CCL3|TNF|TNFRSF1B
GO:2000377	GO Biological Processes	regulation of reactive oxygen species metabolic process	9	-5.00233	-3.19657	AIF1|TSPO|CDKN1A|GNAI2|IL1B|TNF|TYROBP|KLF4|CLEC7A
R-HSA-6785807	Reactome Gene Sets	Interleukin-4 and Interleukin-13 signaling	7	-4.95225	-3.14919	CDKN1A|HMOX1|IL1B|CXCL8|TIMP1|TNF|TNFRSF1B
GO:0045429	GO Biological Processes	positive regulation of nitric oxide biosynthetic process	5	-4.91134	-3.11362	AIF1|IL1B|TNF|KLF4|CLEC7A
GO:1904407	GO Biological Processes	positive regulation of nitric oxide metabolic process	5	-4.8614	-3.06897	AIF1|IL1B|TNF|KLF4|CLEC7A
GO:0006809	GO Biological Processes	nitric oxide biosynthetic process	6	-4.77286	-2.9908	AIF1|TSPO|IL1B|TNF|KLF4|CLEC7A
GO:0021782	GO Biological Processes	glial cell development	7	-4.74927	-2.96976	C5AR1|GRN|IL1B|LRP1|LYN|S100A8|TNF
GO:0051043	GO Biological Processes	regulation of membrane protein ectodomain proteolysis	4	-4.73385	-2.96067	IL1B|TIMP1|TNF|TNFRSF1B
GO:0048708	GO Biological Processes	astrocyte differentiation	6	-4.64653	-2.88204	C5AR1|GRN|IL1B|LRP1|S100A8|TNF
GO:0046209	GO Biological Processes	nitric oxide metabolic process	6	-4.61603	-2.85522	AIF1|TSPO|IL1B|TNF|KLF4|CLEC7A
GO:1903409	GO Biological Processes	reactive oxygen species biosynthetic process	7	-4.60717	-2.84758	AIF1|TSPO|CYBB|IL1B|TNF|KLF4|CLEC7A
GO:0014009	GO Biological Processes	glial cell proliferation	5	-4.58586	-2.82894	TSPO|CSF1R|IL1B|LYN|TNF
GO:0014013	GO Biological Processes	regulation of gliogenesis	7	-4.56157	-2.80921	TSPO|IL1B|LRP1|LYN|CCL3|TNF|TNFRSF1B
GO:2001057	GO Biological Processes	reactive nitrogen species metabolic process	6	-4.52697	-2.78174	AIF1|TSPO|IL1B|TNF|KLF4|CLEC7A
GO:1903428	GO Biological Processes	positive regulation of reactive oxygen species biosynthetic process	5	-4.30717	-2.5815	AIF1|IL1B|TNF|KLF4|CLEC7A
GO:0033619	GO Biological Processes	membrane protein proteolysis	5	-4.23446	-2.52099	CTSH|IL1B|TIMP1|TNF|TNFRSF1B
GO:0045080	GO Biological Processes	positive regulation of chemokine biosynthetic process	3	-4.15081	-2.45239	HMOX1|IL1B|TNF
GO:2000341	GO Biological Processes	regulation of chemokine (C-X-C motif) ligand 2 production	3	-4.15081	-2.45239	LRP1|TNF|KLF4
GO:1903426	GO Biological Processes	regulation of reactive oxygen species biosynthetic process	6	-4.10491	-2.4159	AIF1|TSPO|IL1B|TNF|KLF4|CLEC7A
GO:0060251	GO Biological Processes	regulation of glial cell proliferation	4	-3.99047	-2.31869	TSPO|IL1B|LYN|TNF
GO:0042136	GO Biological Processes	neurotransmitter biosynthetic process	6	-3.98833	-2.31755	AIF1|TSPO|IL1B|TNF|KLF4|CLEC7A
GO:0072567	GO Biological Processes	chemokine (C-X-C motif) ligand 2 production	3	-3.9366	-2.27465	LRP1|TNF|KLF4
GO:0045073	GO Biological Processes	regulation of chemokine biosynthetic process	3	-3.84193	-2.19431	HMOX1|IL1B|TNF
GO:0051044	GO Biological Processes	positive regulation of membrane protein ectodomain proteolysis	3	-3.84193	-2.19431	IL1B|TNF|TNFRSF1B
GO:0010720	GO Biological Processes	positive regulation of cell development	13	-3.83362	-2.18694	TSPO|CUX1|GRN|IL1B|LRP1|LYN|RGS2|S100A9|CCL3|TNF|TNFRSF1B|TYROBP|CLEC7A
GO:0019216	GO Biological Processes	regulation of lipid metabolic process	11	-3.80955	-2.16474	ASAH1|TSPO|FGR|IL1B|LYN|PSAP|TNF|KLF4|MACROH2A1|NPC2|G0S2
GO:0010001	GO Biological Processes	glial cell differentiation	8	-3.80747	-2.16359	C5AR1|GRN|IL1B|LRP1|LYN|S100A8|TNF|TNFRSF1B
GO:0042033	GO Biological Processes	chemokine biosynthetic process	3	-3.75399	-2.11975	HMOX1|IL1B|TNF
GO:0050755	GO Biological Processes	chemokine metabolic process	3	-3.75399	-2.11975	HMOX1|IL1B|TNF
GO:0001505	GO Biological Processes	regulation of neurotransmitter levels	10	-3.67809	-2.04977	AIF1|TSPO|GLUL|IL1B|PPT1|RGS2|TNF|STX11|KLF4|CLEC7A
GO:0150078	GO Biological Processes	positive regulation of neuroinflammatory response	3	-3.59496	-1.98167	IL1B|CCL3|TNF
GO:0006509	GO Biological Processes	membrane protein ectodomain proteolysis	4	-3.55993	-1.9501	IL1B|TIMP1|TNF|TNFRSF1B
GO:0045414	GO Biological Processes	regulation of interleukin-8 biosynthetic process	3	-3.52256	-1.91872	TNF|KLF4|CLEC7A
GO:0042228	GO Biological Processes	interleukin-8 biosynthetic process	3	-3.45421	-1.86458	TNF|KLF4|CLEC7A
GO:0046879	GO Biological Processes	hormone secretion	9	-3.40585	-1.82276	ANXA5|GLUL|IL1B|LRP1|LYN|TCF7L2|TNF|TCIRG1|RAB11FIP1
GO:0023061	GO Biological Processes	signal release	11	-3.34405	-1.76819	ANXA5|GLUL|IL1B|LRP1|LYN|PPT1|TCF7L2|TNF|STX11|TCIRG1|RAB11FIP1
GO:0009914	GO Biological Processes	hormone transport	9	-3.30785	-1.73988	ANXA5|GLUL|IL1B|LRP1|LYN|TCF7L2|TNF|TCIRG1|RAB11FIP1
GO:0050769	GO Biological Processes	positive regulation of neurogenesis	11	-3.27484	-1.71386	TSPO|CUX1|GRN|IL1B|LRP1|LYN|RGS2|S100A9|CCL3|TNF|TNFRSF1B
GO:0046883	GO Biological Processes	regulation of hormone secretion	8	-3.19647	-1.65358	ANXA5|GLUL|IL1B|LRP1|TCF7L2|TNF|TCIRG1|RAB11FIP1
GO:0090276	GO Biological Processes	regulation of peptide hormone secretion	7	-3.17102	-1.63473	ANXA5|GLUL|IL1B|LRP1|TCF7L2|TNF|TCIRG1
GO:0042133	GO Biological Processes	neurotransmitter metabolic process	6	-3.12962	-1.60269	AIF1|TSPO|IL1B|TNF|KLF4|CLEC7A
GO:0034114	GO Biological Processes	regulation of heterotypic cell-cell adhesion	3	-3.0606	-1.53933	IL1B|TNF|KLF4
GO:0034113	GO Biological Processes	heterotypic cell-cell adhesion	4	-3.02665	-1.50887	IL1B|TNF|KLF4|LILRB2
GO:0002526	GO Biological Processes	acute inflammatory response	7	-3.01685	-1.50046	C5AR1|FCER1G|IL1B|CFP|SERPINA1|S100A8|TNF
GO:0009743	GO Biological Processes	response to carbohydrate	7	-2.90566	-1.4043	GLUL|IL1B|LRP1|LYN|TCF7L2|NAMPT|CLEC7A
GO:0002675	GO Biological Processes	positive regulation of acute inflammatory response	3	-2.8829	-1.38422	FCER1G|IL1B|TNF
GO:0050796	GO Biological Processes	regulation of insulin secretion	6	-2.81606	-1.33052	GLUL|IL1B|LRP1|TCF7L2|TNF|TCIRG1
GO:0051962	GO Biological Processes	positive regulation of nervous system development	11	-2.8106	-1.3257	TSPO|CUX1|GRN|IL1B|LRP1|LYN|RGS2|S100A9|CCL3|TNF|TNFRSF1B
GO:0030072	GO Biological Processes	peptide hormone secretion	7	-2.71008	-1.23855	ANXA5|GLUL|IL1B|LRP1|TCF7L2|TNF|TCIRG1
GO:1903829	GO Biological Processes	positive regulation of cellular protein localization	8	-2.68222	-1.21506	BID|FCER1G|IL1B|LGALS3|LRP1|TCF7L2|TNF|TYROBP
GO:1901224	GO Biological Processes	positive regulation of NIK/NF-kappaB signaling	4	-2.677	-1.21046	CD14|IL1B|LGALS9|TNF
GO:0032350	GO Biological Processes	regulation of hormone metabolic process	3	-2.62505	-1.1677	IL1B|TCF7L2|TNF
hsa05332	KEGG Pathway	Graft-versus-host disease	3	-2.53009	-1.08998	HLA-DRB5|IL1B|TNF
hsa05418	KEGG Pathway	Fluid shear stress and atherosclerosis	5	-2.48451	-1.05134	CYBB|HMOX1|IL1B|NCF2|TNF
hsa04940	KEGG Pathway	Type I diabetes mellitus	3	-2.47093	-1.03948	HLA-DRB5|IL1B|TNF
GO:0030073	GO Biological Processes	insulin secretion	6	-2.46433	-1.03573	GLUL|IL1B|LRP1|TCF7L2|TNF|TCIRG1
GO:1903827	GO Biological Processes	regulation of cellular protein localization	10	-2.40497	-0.984805	BID|FCER1G|GLUL|IL1B|LGALS3|LRP1|TCF7L2|TNF|TYROBP|MACROH2A1
GO:0006953	GO Biological Processes	acute-phase response	3	-2.36122	-0.947132	IL1B|SERPINA1|TNF
GO:0010817	GO Biological Processes	regulation of hormone levels	10	-2.35916	-0.945621	ANXA5|TSPO|GLUL|IL1B|LRP1|LYN|TCF7L2|TNF|TCIRG1|RAB11FIP1
GO:0050810	GO Biological Processes	regulation of steroid biosynthetic process	4	-2.34759	-0.935153	ASAH1|TSPO|IL1B|TNF
hsa05146	KEGG Pathway	Amoebiasis	4	-2.33145	-0.920642	CD14|IL1B|CXCL8|TNF
GO:1905952	GO Biological Processes	regulation of lipid localization	5	-2.29968	-0.892129	TSPO|IL1B|LRP1|TNF|PRELID1
hsa04933	KEGG Pathway	AGE-RAGE signaling pathway in diabetic complications	4	-2.28415	-0.878222	CYBB|IL1B|CXCL8|TNF
GO:0002673	GO Biological Processes	regulation of acute inflammatory response	5	-2.26528	-0.860425	C5AR1|FCER1G|IL1B|CFP|TNF
GO:0051353	GO Biological Processes	positive regulation of oxidoreductase activity	3	-2.19209	-0.795751	GNAI2|IL1B|TNF
GO:0045596	GO Biological Processes	negative regulation of cell differentiation	12	-2.14583	-0.757328	TSPO|EREG|IL1B|LRP1|LYN|RGS2|CCL3|TNF|MAFB|LILRB1|FGL2|TMEM176B
GO:0032370	GO Biological Processes	positive regulation of lipid transport	3	-2.04586	-0.674614	IL1B|LRP1|PRELID1
GO:0070265	GO Biological Processes	necrotic cell death	3	-2.00754	-0.646611	TSPO|CD14|TNF
GO:0097191	GO Biological Processes	extrinsic apoptotic signaling pathway	12	-7.19576	-5.11395	BCL2A1|BID|GPX1|HMOX1|IL1B|LGALS3|TCF7L2|TNF|TNFRSF1B|TNFSF10|PYCARD|G0S2
GO:2001236	GO Biological Processes	regulation of extrinsic apoptotic signaling pathway	10	-6.83117	-4.79537	BID|GPX1|HMOX1|IL1B|LGALS3|TCF7L2|TNF|TNFSF10|PYCARD|G0S2
GO:2001237	GO Biological Processes	negative regulation of extrinsic apoptotic signaling pathway	7	-5.0602	-3.24625	GPX1|HMOX1|IL1B|LGALS3|TCF7L2|TNF|TNFSF10
GO:0008625	GO Biological Processes	extrinsic apoptotic signaling pathway via death domain receptors	6	-4.49806	-2.75635	BID|GPX1|HMOX1|LGALS3|TNF|TNFSF10
GO:1902041	GO Biological Processes	regulation of extrinsic apoptotic signaling pathway via death domain receptors	4	-3.13611	-1.60703	GPX1|HMOX1|LGALS3|TNFSF10
GO:1902042	GO Biological Processes	negative regulation of extrinsic apoptotic signaling pathway via death domain receptors	3	-2.59251	-1.13878	GPX1|HMOX1|TNFSF10
GO:1904019	GO Biological Processes	epithelial cell apoptotic process	4	-2.07046	-0.690675	BID|HMOX1|TCF7L2|TNF
GO:1901652	GO Biological Processes	response to peptide	17	-6.75199	-4.72529	ANXA5|CYBB|EREG|GNAI2|NR4A1|IL1B|LRP1|LYN|PTPRE|TIMP1|TNFSF10|ATP6V0D1|KLF4|NAMPT|TCIRG1|RAB31|AGTRAP
GO:0043434	GO Biological Processes	response to peptide hormone	15	-6.30744	-4.34736	ANXA5|CYBB|EREG|GNAI2|NR4A1|IL1B|LYN|PTPRE|TIMP1|TNFSF10|ATP6V0D1|NAMPT|TCIRG1|RAB31|AGTRAP
GO:1901653	GO Biological Processes	cellular response to peptide	13	-5.41723	-3.55981	ANXA5|GNAI2|NR4A1|IL1B|LRP1|LYN|PTPRE|ATP6V0D1|KLF4|NAMPT|TCIRG1|RAB31|AGTRAP
GO:0071417	GO Biological Processes	cellular response to organonitrogen compound	16	-5.38149	-3.53163	AIF1|ANXA5|CYBB|GNAI2|NR4A1|IL1B|LRP1|LYN|PTPRE|TNF|ATP6V0D1|KLF4|NAMPT|TCIRG1|RAB31|AGTRAP
GO:1901699	GO Biological Processes	cellular response to nitrogen compound	16	-4.83167	-3.04316	AIF1|ANXA5|CYBB|GNAI2|NR4A1|IL1B|LRP1|LYN|PTPRE|TNF|ATP6V0D1|KLF4|NAMPT|TCIRG1|RAB31|AGTRAP
GO:0071375	GO Biological Processes	cellular response to peptide hormone stimulus	11	-4.73859	-2.96164	ANXA5|GNAI2|NR4A1|IL1B|LYN|PTPRE|ATP6V0D1|NAMPT|TCIRG1|RAB31|AGTRAP
GO:0007169	GO Biological Processes	transmembrane receptor protein tyrosine kinase signaling pathway	16	-4.29856	-2.57513	CSF1R|CYBB|EREG|FGR|GNAI2|HCK|IL1B|LRP1|LYN|NCF2|PLAUR|PTPRE|MAPKAPK3|ATP6V0D1|NAMPT|TCIRG1
GO:0032870	GO Biological Processes	cellular response to hormone stimulus	15	-3.87925	-2.22404	AIF1|ANXA5|CTSB|CTSH|CTSS|GNAI2|NR4A1|IL1B|LYN|PTPRE|ATP6V0D1|NAMPT|TCIRG1|RAB31|AGTRAP
GO:0032868	GO Biological Processes	response to insulin	9	-3.85297	-2.20062	GNAI2|IL1B|LYN|PTPRE|TNFSF10|ATP6V0D1|NAMPT|TCIRG1|RAB31
GO:0008286	GO Biological Processes	insulin receptor signaling pathway	6	-3.28395	-1.72142	GNAI2|IL1B|PTPRE|ATP6V0D1|NAMPT|TCIRG1
GO:0032869	GO Biological Processes	cellular response to insulin stimulus	7	-3.05142	-1.53155	GNAI2|IL1B|PTPRE|ATP6V0D1|NAMPT|TCIRG1|RAB31
GO:0045730	GO Biological Processes	respiratory burst	6	-6.68106	-4.65883	CYBB|GRN|HCK|NCF2|SLC11A1|CLEC7A
GO:0042832	GO Biological Processes	defense response to protozoan	3	-3.21383	-1.66425	LYST|SLC11A1|CLEC7A
GO:0001562	GO Biological Processes	response to protozoan	3	-3.16054	-1.6286	LYST|SLC11A1|CLEC7A
GO:0032623	GO Biological Processes	interleukin-2 production	4	-3.02665	-1.50887	FCER1G|IL1B|SLC11A1|CLEC7A
GO:0002577	GO Biological Processes	regulation of antigen processing and presentation	5	-6.64784	-4.63444	CD68|SLC11A1|LILRB2|FGL2|PYCARD
GO:0002578	GO Biological Processes	negative regulation of antigen processing and presentation	3	-4.56223	-2.80921	CD68|LILRB2|FGL2
GO:0002604	GO Biological Processes	regulation of dendritic cell antigen processing and presentation	3	-4.27351	-2.55342	CD68|SLC11A1|FGL2
GO:0002468	GO Biological Processes	dendritic cell antigen processing and presentation	3	-4.15081	-2.45239	CD68|SLC11A1|FGL2
hsa05323	KEGG Pathway	Rheumatoid arthritis	8	-6.63546	-4.6264	HLA-DRB5|IL1B|CXCL8|CCL3|TNF|ATP6V0D1|TCIRG1|TNFSF13B
hsa04060	KEGG Pathway	Cytokine-cytokine receptor interaction	10	-4.66417	-2.89597	CSF1R|CSF3R|IL1B|CXCL8|CCL3|TNF|TNFRSF1B|TNFSF10|TNFSF13B|CXCL16
hsa04640	KEGG Pathway	Hematopoietic cell lineage	6	-4.20298	-2.4906	CD14|CSF1R|CSF3R|HLA-DRB5|IL1B|TNF
GO:0048871	GO Biological Processes	multicellular organismal homeostasis	9	-2.13638	-0.7484	CSF1R|CTSH|GPX1|IL1B|LYZ|SLC11A1|TNF|TCIRG1|G0S2
GO:0071674	GO Biological Processes	mononuclear cell migration	8	-6.59807	-4.59756	AIF1|C5AR1|LGALS3|LYN|S100A12|CCL3|TNF|JAML
GO:0002685	GO Biological Processes	regulation of leukocyte migration	10	-5.87115	-3.95683	AIF1|C5AR1|HMOX1|CXCL8|LGALS3|LGALS9|LYN|CCL3|TNF|PYCARD
GO:0002687	GO Biological Processes	positive regulation of leukocyte migration	8	-5.46729	-3.60064	AIF1|C5AR1|CXCL8|LGALS3|LGALS9|CCL3|TNF|PYCARD
GO:0071675	GO Biological Processes	regulation of mononuclear cell migration	5	-4.76518	-2.9844	AIF1|C5AR1|LGALS3|LYN|TNF
GO:0002548	GO Biological Processes	monocyte chemotaxis	5	-3.99991	-2.326	AIF1|LGALS3|LYN|S100A12|CCL3
GO:0002688	GO Biological Processes	regulation of leukocyte chemotaxis	6	-3.81424	-2.1685	AIF1|C5AR1|CXCL8|LGALS9|LYN|CCL3
GO:0002690	GO Biological Processes	positive regulation of leukocyte chemotaxis	5	-3.43475	-1.8484	AIF1|C5AR1|CXCL8|LGALS9|CCL3
GO:0071677	GO Biological Processes	positive regulation of mononuclear cell migration	3	-3.21383	-1.66425	AIF1|LGALS3|TNF
GO:0072678	GO Biological Processes	T cell migration	4	-2.9496	-1.4408	AIF1|CCL3|PYCARD|CXCL16
GO:2000403	GO Biological Processes	positive regulation of lymphocyte migration	3	-2.65855	-1.19509	AIF1|CCL3|PYCARD
GO:0048246	GO Biological Processes	macrophage chemotaxis	3	-2.62505	-1.1677	C5AR1|LGALS3|CCL3
GO:0050921	GO Biological Processes	positive regulation of chemotaxis	5	-2.57898	-1.12944	AIF1|C5AR1|CXCL8|LGALS9|CCL3
GO:0050920	GO Biological Processes	regulation of chemotaxis	6	-2.36459	-0.948206	AIF1|C5AR1|CXCL8|LGALS9|LYN|CCL3
GO:1905517	GO Biological Processes	macrophage migration	3	-2.2147	-0.816253	C5AR1|LGALS3|CCL3
GO:0072676	GO Biological Processes	lymphocyte migration	4	-2.11044	-0.725039	AIF1|CCL3|PYCARD|CXCL16
GO:2000401	GO Biological Processes	regulation of lymphocyte migration	3	-2.00754	-0.646611	AIF1|CCL3|PYCARD
GO:2001179	GO Biological Processes	regulation of interleukin-10 secretion	4	-6.54743	-4.55323	LGALS9|LILRB1|PYCARD|LILRA5
GO:0072608	GO Biological Processes	interleukin-10 secretion	4	-6.13404	-4.18913	LGALS9|LILRB1|PYCARD|LILRA5
GO:2001181	GO Biological Processes	positive regulation of interleukin-10 secretion	3	-4.93796	-3.13758	LGALS9|PYCARD|LILRA5
GO:2001182	GO Biological Processes	regulation of interleukin-12 secretion	3	-4.73608	-2.96164	LGALS9|LILRB1|LILRA5
GO:2000106	GO Biological Processes	regulation of leukocyte apoptotic process	6	-4.58594	-2.82894	FCER1G|LGALS3|LGALS9|LYN|LILRB1|PRELID1
GO:0072610	GO Biological Processes	interleukin-12 secretion	3	-4.40957	-2.67709	LGALS9|LILRB1|LILRA5
GO:0097048	GO Biological Processes	dendritic cell apoptotic process	3	-4.40957	-2.67709	LGALS9|LYN|LILRB1
GO:2000668	GO Biological Processes	regulation of dendritic cell apoptotic process	3	-4.40957	-2.67709	LGALS9|LYN|LILRB1
GO:0071887	GO Biological Processes	leukocyte apoptotic process	6	-4.0342	-2.35541	FCER1G|LGALS3|LGALS9|LYN|LILRB1|PRELID1
GO:1904469	GO Biological Processes	positive regulation of tumor necrosis factor secretion	3	-3.3895	-1.80802	LGALS9|LILRA2|LILRA5
GO:0072643	GO Biological Processes	interferon-gamma secretion	3	-3.32806	-1.75774	LGALS9|TCIRG1|LILRB1
GO:0070228	GO Biological Processes	regulation of lymphocyte apoptotic process	4	-3.28536	-1.72152	LGALS3|LGALS9|LYN|PRELID1
GO:0032655	GO Biological Processes	regulation of interleukin-12 production	4	-3.25429	-1.69867	LGALS9|LILRB1|CLEC7A|LILRA5
GO:0032615	GO Biological Processes	interleukin-12 production	4	-3.19403	-1.65188	LGALS9|LILRB1|CLEC7A|LILRA5
GO:2000108	GO Biological Processes	positive regulation of leukocyte apoptotic process	3	-3.01361	-1.49862	LGALS9|LYN|PRELID1
GO:0070227	GO Biological Processes	lymphocyte apoptotic process	4	-2.85285	-1.35881	LGALS3|LGALS9|LYN|PRELID1
GO:1904467	GO Biological Processes	regulation of tumor necrosis factor secretion	3	-2.84237	-1.35293	LGALS9|LILRA2|LILRA5
GO:0070232	GO Biological Processes	regulation of T cell apoptotic process	3	-2.80321	-1.3196	LGALS3|LGALS9|PRELID1
GO:1990774	GO Biological Processes	tumor necrosis factor secretion	3	-2.72862	-1.2552	LGALS9|LILRA2|LILRA5
GO:0070231	GO Biological Processes	T cell apoptotic process	3	-2.36122	-0.947132	LGALS3|LGALS9|PRELID1
GO:0002704	GO Biological Processes	negative regulation of leukocyte mediated immunity	3	-2.31018	-0.902088	HMOX1|LGALS9|LILRB1
GO:0045824	GO Biological Processes	negative regulation of innate immune response	3	-2.08563	-0.703811	GRN|LGALS9|LILRB1
GO:0042267	GO Biological Processes	natural killer cell mediated cytotoxicity	3	-2.04586	-0.674614	LYST|LGALS9|LILRB1
GO:0002576	GO Biological Processes	platelet degranulation	9	-6.51802	-4.52798	ANXA5|APLP2|CFD|FCER1G|LYN|SERPINA1|PSAP|STXBP2|TIMP1
R-HSA-76002	Reactome Gene Sets	Platelet activation, signaling and aggregation	10	-4.77629	-2.99166	ANXA5|APLP2|CFD|FCER1G|GNAI2|LYN|SERPINA1|PSAP|STXBP2|TIMP1
R-HSA-114608	Reactome Gene Sets	Platelet degranulation	7	-4.45113	-2.71289	ANXA5|APLP2|CFD|SERPINA1|PSAP|STXBP2|TIMP1
R-HSA-76005	Reactome Gene Sets	Response to elevated platelet cytosolic Ca2+	7	-4.34547	-2.61754	ANXA5|APLP2|CFD|SERPINA1|PSAP|STXBP2|TIMP1
R-HSA-109582	Reactome Gene Sets	Hemostasis	14	-3.89945	-2.24136	ANXA5|APLP2|CFD|FCER1G|FGR|GNAI2|LYN|SERPINA1|PLAUR|PSAP|STXBP2|TIMP1|SLC7A7|JAML
R-HSA-8957275	Reactome Gene Sets	Post-translational protein phosphorylation	5	-3.00631	-1.49339	APLP2|VCAN|CST3|SERPINA1|TIMP1
R-HSA-381426	Reactome Gene Sets	Regulation of Insulin-like Growth Factor (IGF) transport and uptake by Insulin-like Growth Factor Bi	5	-2.72452	-1.25173	APLP2|VCAN|CST3|SERPINA1|TIMP1
GO:0002250	GO Biological Processes	adaptive immune response	19	-6.50049	-4.51456	CTSH|CTSS|FCER1G|HLA-DRB5|IL1B|LYN|POU2F2|SLC11A1|TNF|TNFRSF1B|LILRB2|TCIRG1|TNFSF13B|LILRB1|FGL2|LILRA1|PYCARD|NFKBIZ|SIGLEC10
GO:1903531	GO Biological Processes	negative regulation of secretion by cell	11	-6.48018	-4.50036	ANXA5|GNAI2|HMOX1|IL1B|LGALS9|TNF|TNFRSF1B|LILRB1|RAB11FIP1|CARD16|LILRA5
GO:0051051	GO Biological Processes	negative regulation of transport	16	-6.00267	-4.07062	ANXA5|GNAI2|HMOX1|IL1B|LGALS3|LGALS9|RGS2|TNF|TNFRSF1B|UNC119|LILRB2|LILRB1|ATG3|RAB11FIP1|CARD16|LILRA5
GO:0051048	GO Biological Processes	negative regulation of secretion	11	-5.96744	-4.04078	ANXA5|GNAI2|HMOX1|IL1B|LGALS9|TNF|TNFRSF1B|LILRB1|RAB11FIP1|CARD16|LILRA5
GO:0001818	GO Biological Processes	negative regulation of cytokine production	12	-5.86879	-3.9562	TSPO|HMOX1|LGALS9|SLC11A1|TNF|TYROBP|KLF4|LILRB1|PYCARD|VSIR|CARD16|LILRA5
GO:0002819	GO Biological Processes	regulation of adaptive immune response	9	-5.7032	-3.81745	FCER1G|IL1B|SLC11A1|TNF|TNFRSF1B|TNFSF13B|LILRB1|PYCARD|NFKBIZ
GO:0002440	GO Biological Processes	production of molecular mediator of immune response	11	-5.20453	-3.36793	FCER1G|HMOX1|IL1B|POU2F2|SLC11A1|TNF|TNFRSF1B|TCIRG1|TNFSF13B|LILRB1|FGL2
GO:0002449	GO Biological Processes	lymphocyte mediated immunity	12	-5.11441	-3.29211	LYST|CTSH|FCER1G|IL1B|LGALS9|POU2F2|SLC11A1|TNF|TNFRSF1B|TCIRG1|LILRB1|FGL2
GO:0002367	GO Biological Processes	cytokine production involved in immune response	7	-5.08792	-3.26842	FCER1G|HMOX1|IL1B|SLC11A1|TNF|TNFRSF1B|LILRB1
GO:0002822	GO Biological Processes	regulation of adaptive immune response based on somatic recombination of immune receptors built from	8	-5.06611	-3.25078	FCER1G|IL1B|SLC11A1|TNF|TNFRSF1B|TNFSF13B|LILRB1|NFKBIZ
GO:0002821	GO Biological Processes	positive regulation of adaptive immune response	7	-5.03278	-3.22295	FCER1G|IL1B|SLC11A1|TNF|TNFSF13B|PYCARD|NFKBIZ
GO:0002460	GO Biological Processes	adaptive immune response based on somatic recombination of immune receptors built from immunoglobuli	12	-4.99266	-3.18825	CTSH|FCER1G|IL1B|POU2F2|SLC11A1|TNF|TNFRSF1B|TCIRG1|TNFSF13B|LILRB1|FGL2|NFKBIZ
GO:0002718	GO Biological Processes	regulation of cytokine production involved in immune response	6	-4.55626	-2.8051	FCER1G|HMOX1|IL1B|TNF|TNFRSF1B|LILRB1
GO:0050709	GO Biological Processes	negative regulation of protein secretion	7	-4.16625	-2.45746	ANXA5|IL1B|TNF|LILRB1|RAB11FIP1|CARD16|LILRA5
GO:0002824	GO Biological Processes	positive regulation of adaptive immune response based on somatic recombination of immune receptors b	6	-4.12901	-2.43187	FCER1G|IL1B|SLC11A1|TNF|TNFSF13B|NFKBIZ
GO:0002792	GO Biological Processes	negative regulation of peptide secretion	7	-4.03563	-2.35541	ANXA5|IL1B|TNF|LILRB1|RAB11FIP1|CARD16|LILRA5
GO:0002739	GO Biological Processes	regulation of cytokine secretion involved in immune response	3	-3.75399	-2.11975	TNF|TNFRSF1B|LILRB1
GO:0002374	GO Biological Processes	cytokine secretion involved in immune response	3	-3.45421	-1.86458	TNF|TNFRSF1B|LILRB1
GO:0051224	GO Biological Processes	negative regulation of protein transport	7	-3.33741	-1.76257	ANXA5|IL1B|TNF|LILRB1|RAB11FIP1|CARD16|LILRA5
GO:0002700	GO Biological Processes	regulation of production of molecular mediator of immune response	6	-3.33274	-1.75926	FCER1G|HMOX1|IL1B|TNF|TNFRSF1B|LILRB1
GO:1904950	GO Biological Processes	negative regulation of establishment of protein localization	7	-3.28482	-1.72152	ANXA5|IL1B|TNF|LILRB1|RAB11FIP1|CARD16|LILRA5
GO:0002706	GO Biological Processes	regulation of lymphocyte mediated immunity	6	-3.18988	-1.64921	FCER1G|IL1B|LGALS9|TNF|TNFRSF1B|LILRB1
GO:0002719	GO Biological Processes	negative regulation of cytokine production involved in immune response	3	-3.16054	-1.6286	HMOX1|TNF|LILRB1
GO:0002456	GO Biological Processes	T cell mediated immunity	5	-3.00631	-1.49339	CTSH|IL1B|SLC11A1|TNFRSF1B|LILRB1
GO:0061082	GO Biological Processes	myeloid leukocyte cytokine production	3	-2.8829	-1.38422	FCER1G|HMOX1|LILRB1
GO:0002701	GO Biological Processes	negative regulation of production of molecular mediator of immune response	3	-2.72862	-1.2552	HMOX1|TNF|LILRB1
GO:0050710	GO Biological Processes	negative regulation of cytokine secretion	4	-2.69782	-1.22817	TNF|LILRB1|CARD16|LILRA5
GO:0002369	GO Biological Processes	T cell cytokine production	3	-2.56087	-1.1143	IL1B|SLC11A1|TNFRSF1B
GO:0002720	GO Biological Processes	positive regulation of cytokine production involved in immune response	3	-2.19209	-0.795751	FCER1G|IL1B|LILRB1
GO:0048660	GO Biological Processes	regulation of smooth muscle cell proliferation	10	-6.48117	-4.50036	AIF1|CDKN1A|EREG|GNAI2|HMOX1|SOD2|TCF7L2|TNF|KLF4|NAMPT
GO:0048659	GO Biological Processes	smooth muscle cell proliferation	10	-6.43387	-4.46403	AIF1|CDKN1A|EREG|GNAI2|HMOX1|SOD2|TCF7L2|TNF|KLF4|NAMPT
GO:0033002	GO Biological Processes	muscle cell proliferation	10	-5.12299	-3.29786	AIF1|CDKN1A|EREG|GNAI2|HMOX1|SOD2|TCF7L2|TNF|KLF4|NAMPT
GO:0071496	GO Biological Processes	cellular response to external stimulus	11	-4.54572	-2.79708	AIF1|CASP1|CD68|CDKN1A|CYBB|GLUL|HMOX1|IL1B|LYN|MYD88|NAMPT
GO:0048661	GO Biological Processes	positive regulation of smooth muscle cell proliferation	6	-4.10491	-2.4159	AIF1|EREG|GNAI2|HMOX1|TNF|NAMPT
GO:0048662	GO Biological Processes	negative regulation of smooth muscle cell proliferation	5	-3.96868	-2.30085	AIF1|CDKN1A|HMOX1|SOD2|KLF4
GO:1904705	GO Biological Processes	regulation of vascular smooth muscle cell proliferation	5	-3.48159	-1.88534	CDKN1A|GNAI2|HMOX1|SOD2|TNF
GO:1990874	GO Biological Processes	vascular smooth muscle cell proliferation	5	-3.48159	-1.88534	CDKN1A|GNAI2|HMOX1|SOD2|TNF
GO:0031668	GO Biological Processes	cellular response to extracellular stimulus	8	-3.20703	-1.6582	AIF1|CD68|CDKN1A|CYBB|GLUL|HMOX1|LYN|NAMPT
GO:0009991	GO Biological Processes	response to extracellular stimulus	11	-2.87467	-1.37865	AIF1|TSPO|CD68|CDKN1A|CYBB|GLUL|GNAI2|HMOX1|IL1B|LYN|NAMPT
GO:1904706	GO Biological Processes	negative regulation of vascular smooth muscle cell proliferation	3	-2.62505	-1.1677	CDKN1A|HMOX1|SOD2
GO:0031669	GO Biological Processes	cellular response to nutrient levels	6	-2.18153	-0.785721	CD68|CDKN1A|CYBB|GLUL|HMOX1|NAMPT
GO:0031667	GO Biological Processes	response to nutrient levels	9	-2.05987	-0.683622	TSPO|CD68|CDKN1A|CYBB|GLUL|GNAI2|HMOX1|IL1B|NAMPT
GO:0008217	GO Biological Processes	regulation of blood pressure	5	-2.03509	-0.666817	HMOX1|SGK1|SOD2|NAMPT|AGTRAP
GO:0008630	GO Biological Processes	intrinsic apoptotic signaling pathway in response to DNA damage	8	-6.14996	-4.20189	BCL2A1|BID|CDKN1A|HMOX1|TNF|TNFRSF1B|ZNF385A|PYCARD
GO:0042771	GO Biological Processes	intrinsic apoptotic signaling pathway in response to DNA damage by p53 class mediator	3	-2.41473	-0.991878	CDKN1A|ZNF385A|PYCARD
GO:2000045	GO Biological Processes	regulation of G1/S transition of mitotic cell cycle	5	-2.01589	-0.652534	AIF1|BID|CDKN1A|KLF4|ZNF385A
GO:0001944	GO Biological Processes	vasculature development	20	-6.11083	-4.16779	C5AR1|CTSH|CYBB|EREG|GLUL|GPX1|GRN|HMOX1|NR4A1|IL1B|CXCL8|LRP1|SAT1|SOD2|SPI1|TCF7L2|TGFBI|TNFAIP2|WARS1|KLF4
GO:0048514	GO Biological Processes	blood vessel morphogenesis	18	-5.81912	-3.91191	C5AR1|CTSH|CYBB|EREG|GLUL|GPX1|GRN|HMOX1|NR4A1|IL1B|CXCL8|LRP1|SAT1|SPI1|TGFBI|TNFAIP2|WARS1|KLF4
GO:0001568	GO Biological Processes	blood vessel development	19	-5.75334	-3.85938	C5AR1|CTSH|CYBB|EREG|GLUL|GPX1|GRN|HMOX1|NR4A1|IL1B|CXCL8|LRP1|SAT1|SPI1|TCF7L2|TGFBI|TNFAIP2|WARS1|KLF4
GO:0001525	GO Biological Processes	angiogenesis	16	-5.39083	-3.53947	C5AR1|CTSH|CYBB|EREG|GLUL|GPX1|GRN|HMOX1|NR4A1|IL1B|CXCL8|SAT1|TGFBI|TNFAIP2|WARS1|KLF4
GO:1904018	GO Biological Processes	positive regulation of vasculature development	9	-4.43492	-2.69784	C5AR1|CTSH|CYBB|GRN|HMOX1|IL1B|CXCL8|SOD2|KLF4
GO:0050678	GO Biological Processes	regulation of epithelial cell proliferation	11	-4.01919	-2.34141	C5AR1|EREG|GLUL|GPX1|GRN|HMOX1|NR4A1|NOTCH2|TCF7L2|TNF|JAML
GO:0045766	GO Biological Processes	positive regulation of angiogenesis	8	-4.0062	-2.33042	C5AR1|CTSH|CYBB|GRN|HMOX1|IL1B|CXCL8|KLF4
GO:0050679	GO Biological Processes	positive regulation of epithelial cell proliferation	8	-3.97682	-2.30801	C5AR1|GLUL|GRN|HMOX1|NR4A1|NOTCH2|TCF7L2|JAML
GO:1901342	GO Biological Processes	regulation of vasculature development	11	-3.68358	-2.05256	C5AR1|CTSH|CYBB|GLUL|GRN|HMOX1|IL1B|CXCL8|SOD2|WARS1|KLF4
GO:0050673	GO Biological Processes	epithelial cell proliferation	11	-3.49625	-1.89747	C5AR1|EREG|GLUL|GPX1|GRN|HMOX1|NR4A1|NOTCH2|TCF7L2|TNF|JAML
GO:0045765	GO Biological Processes	regulation of angiogenesis	10	-3.40784	-1.82393	C5AR1|CTSH|CYBB|GLUL|GRN|HMOX1|IL1B|CXCL8|WARS1|KLF4
GO:0006801	GO Biological Processes	superoxide metabolic process	7	-6.09655	-4.1572	CYBB|GNAI2|NCF2|SOD2|TNF|TYROBP|CLEC7A
GO:0001906	GO Biological Processes	cell killing	9	-5.4445	-3.58249	LYST|CTSH|LGALS9|LYZ|S100A12|STXBP2|TYROBP|LILRB1|CLEC7A
GO:0042554	GO Biological Processes	superoxide anion generation	5	-5.30128	-3.46177	CYBB|GNAI2|NCF2|TYROBP|CLEC7A
GO:2001204	GO Biological Processes	regulation of osteoclast development	3	-4.27351	-2.55342	NOTCH2|TYROBP|LILRB1
GO:0042533	GO Biological Processes	tumor necrosis factor biosynthetic process	4	-4.04081	-2.35795	CYBB|TYROBP|LILRB1|CLEC7A
GO:0042534	GO Biological Processes	regulation of tumor necrosis factor biosynthetic process	4	-4.04081	-2.35795	CYBB|TYROBP|LILRB1|CLEC7A
GO:0098751	GO Biological Processes	bone cell development	4	-3.99047	-2.31869	NOTCH2|TYROBP|LILRB1|ZNF385A
GO:0001909	GO Biological Processes	leukocyte mediated cytotoxicity	6	-3.94344	-2.27856	LYST|CTSH|LGALS9|STXBP2|TYROBP|LILRB1
GO:0090322	GO Biological Processes	regulation of superoxide metabolic process	4	-3.94168	-2.27778	GNAI2|TNF|TYROBP|CLEC7A
GO:0032693	GO Biological Processes	negative regulation of interleukin-10 production	3	-3.59496	-1.98167	TYROBP|LILRB1|VSIR
GO:0036035	GO Biological Processes	osteoclast development	3	-3.59496	-1.98167	NOTCH2|TYROBP|LILRB1
GO:0032930	GO Biological Processes	positive regulation of superoxide anion generation	3	-3.52256	-1.91872	GNAI2|TYROBP|CLEC7A
GO:0042535	GO Biological Processes	positive regulation of tumor necrosis factor biosynthetic process	3	-3.45421	-1.86458	CYBB|TYROBP|CLEC7A
GO:0032928	GO Biological Processes	regulation of superoxide anion generation	3	-3.32806	-1.75774	GNAI2|TYROBP|CLEC7A
GO:1903010	GO Biological Processes	regulation of bone development	3	-3.21383	-1.66425	NOTCH2|TYROBP|LILRB1
GO:0061515	GO Biological Processes	myeloid cell development	4	-2.82964	-1.34281	NOTCH2|TYROBP|LILRB1|ZNF385A
GO:0042036	GO Biological Processes	negative regulation of cytokine biosynthetic process	3	-2.56087	-1.1143	TYROBP|KLF4|LILRB1
GO:0031341	GO Biological Processes	regulation of cell killing	4	-2.25354	-0.851364	LGALS9|TYROBP|LILRB1|CLEC7A
GO:0046916	GO Biological Processes	cellular transition metal ion homeostasis	8	-6.02457	-4.08889	SLC31A2|FTH1|FTL|HMOX1|S100A8|S100A9|SLC11A1|ATP6V0D1
GO:0030003	GO Biological Processes	cellular cation homeostasis	17	-5.44177	-3.58129	ANXA5|C5AR1|SLC31A2|FPR1|FTH1|FTL|GRN|HMOX1|LRP1|LYN|PPT1|S100A8|S100A9|CCL3|SLC11A1|ATP6V0D1|TCIRG1
GO:0051238	GO Biological Processes	sequestering of metal ion	4	-5.40436	-3.54846	FTH1|FTL|S100A8|S100A9
GO:0055080	GO Biological Processes	cation homeostasis	18	-5.3982	-3.54382	ANXA5|C5AR1|SLC31A2|FPR1|FTH1|FTL|GNAI2|GRN|HMOX1|LRP1|LYN|PPT1|S100A8|S100A9|CCL3|SLC11A1|ATP6V0D1|TCIRG1
GO:0055076	GO Biological Processes	transition metal ion homeostasis	8	-5.39224	-3.53947	SLC31A2|FTH1|FTL|HMOX1|S100A8|S100A9|SLC11A1|ATP6V0D1
GO:0006873	GO Biological Processes	cellular ion homeostasis	17	-5.32846	-3.48158	ANXA5|C5AR1|SLC31A2|FPR1|FTH1|FTL|GRN|HMOX1|LRP1|LYN|PPT1|S100A8|S100A9|CCL3|SLC11A1|ATP6V0D1|TCIRG1
GO:0098771	GO Biological Processes	inorganic ion homeostasis	18	-5.30884	-3.46345	ANXA5|C5AR1|SLC31A2|FPR1|FTH1|FTL|GNAI2|GRN|HMOX1|LRP1|LYN|PPT1|S100A8|S100A9|CCL3|SLC11A1|ATP6V0D1|TCIRG1
hsa04216	KEGG Pathway	Ferroptosis	5	-5.06919	-3.25248	CYBB|FTH1|FTL|HMOX1|SAT1
GO:0006875	GO Biological Processes	cellular metal ion homeostasis	15	-4.82396	-3.03674	ANXA5|C5AR1|SLC31A2|FPR1|FTH1|FTL|HMOX1|LRP1|LYN|S100A8|S100A9|CCL3|SLC11A1|ATP6V0D1|TCIRG1
GO:0055065	GO Biological Processes	metal ion homeostasis	16	-4.81538	-3.02946	ANXA5|C5AR1|SLC31A2|FPR1|FTH1|FTL|GNAI2|HMOX1|LRP1|LYN|S100A8|S100A9|CCL3|SLC11A1|ATP6V0D1|TCIRG1
R-HSA-917937	Reactome Gene Sets	Iron uptake and transport	5	-4.27047	-2.55149	FTH1|FTL|HMOX1|ATP6V0D1|TCIRG1
GO:0006879	GO Biological Processes	cellular iron ion homeostasis	5	-4.16442	-2.45746	FTH1|FTL|HMOX1|SLC11A1|ATP6V0D1
GO:0006826	GO Biological Processes	iron ion transport	5	-4.064	-2.37808	FTH1|FTL|SLC11A1|ATP6V0D1|TCIRG1
GO:0051235	GO Biological Processes	maintenance of location	10	-3.93476	-2.27377	ANXA5|TSPO|FTH1|FTL|IL1B|LYN|S100A8|S100A9|CCL3|TNF
GO:0000041	GO Biological Processes	transition metal ion transport	6	-3.85643	-2.20313	SLC31A2|FTH1|FTL|SLC11A1|ATP6V0D1|TCIRG1
GO:0055072	GO Biological Processes	iron ion homeostasis	5	-3.62995	-2.00877	FTH1|FTL|HMOX1|SLC11A1|ATP6V0D1
GO:0072503	GO Biological Processes	cellular divalent inorganic cation homeostasis	10	-2.58615	-1.13303	ANXA5|C5AR1|FPR1|LRP1|LYN|S100A8|S100A9|CCL3|SLC11A1|TCIRG1
R-HSA-2173782	Reactome Gene Sets	Binding and Uptake of Ligands by Scavenger Receptors	3	-2.50012	-1.0658	FTH1|FTL|LRP1
GO:0072507	GO Biological Processes	divalent inorganic cation homeostasis	10	-2.46368	-1.03565	ANXA5|C5AR1|FPR1|LRP1|LYN|S100A8|S100A9|CCL3|SLC11A1|TCIRG1
hsa04978	KEGG Pathway	Mineral absorption	3	-2.2614	-0.858155	FTH1|FTL|HMOX1
R-HSA-432722	Reactome Gene Sets	Golgi Associated Vesicle Biogenesis	3	-2.14823	-0.758692	FTH1|FTL|AP1S2
GO:0048678	GO Biological Processes	response to axon injury	7	-5.93767	-4.01679	AIF1|TSPO|GRN|LRP1|LYN|TYROBP|KLF4
GO:0031099	GO Biological Processes	regeneration	9	-4.94915	-3.14744	TSPO|C5AR1|CDKN1A|GPX1|GRN|HMOX1|LRP1|NINJ1|KLF4
GO:0031103	GO Biological Processes	axon regeneration	4	-3.34949	-1.77101	TSPO|GRN|LRP1|KLF4
GO:0031102	GO Biological Processes	neuron projection regeneration	4	-3.10797	-1.58388	TSPO|GRN|LRP1|KLF4
GO:0048679	GO Biological Processes	regulation of axon regeneration	3	-3.01361	-1.49862	GRN|LRP1|KLF4
GO:0050918	GO Biological Processes	positive chemotaxis	4	-2.87644	-1.37975	CXCL8|LGALS3|LRP1|CCL3
GO:0070570	GO Biological Processes	regulation of neuron projection regeneration	3	-2.84237	-1.35293	GRN|LRP1|KLF4
GO:0008347	GO Biological Processes	glial cell migration	3	-2.31018	-0.902088	TSPO|LRP1|CCL3
GO:0051099	GO Biological Processes	positive regulation of binding	5	-2.06438	-0.687371	LGALS3|LRP1|PLAUR|TCF7L2|KLF4
GO:0019322	GO Biological Processes	pentose biosynthetic process	3	-5.87324	-3.95718	PGD|TALDO1|TKT
M00004	KEGG Pathway	Pentose phosphate pathway (Pentose phosphate cycle)	3	-4.15081	-2.45239	PGD|TALDO1|TKT
hsa_M00004	KEGG Pathway	Pentose phosphate pathway (Pentose phosphate cycle)	3	-4.15081	-2.45239	PGD|TALDO1|TKT
GO:0006098	GO Biological Processes	pentose-phosphate shunt	3	-3.84193	-2.19431	PGD|TALDO1|TKT
GO:0019321	GO Biological Processes	pentose metabolic process	3	-3.84193	-2.19431	PGD|TALDO1|TKT
R-HSA-71336	Reactome Gene Sets	Pentose phosphate pathway	3	-3.84193	-2.19431	PGD|TALDO1|TKT
GO:0019682	GO Biological Processes	glyceraldehyde-3-phosphate metabolic process	3	-3.3895	-1.80802	PGD|TALDO1|TKT
GO:0051156	GO Biological Processes	glucose 6-phosphate metabolic process	3	-3.16054	-1.6286	PGD|TALDO1|TKT
hsa00030	KEGG Pathway	Pentose phosphate pathway	3	-2.92488	-1.42015	PGD|TALDO1|TKT
GO:0006739	GO Biological Processes	NADP metabolic process	3	-2.84237	-1.35293	PGD|TALDO1|TKT
R-HSA-168898	Reactome Gene Sets	Toll-like Receptor Cascades	9	-5.81763	-3.91191	CD14|CTSB|CTSS|DUSP6|MYD88|S100A8|S100A9|S100A12|MAPKAPK3
GO:0045859	GO Biological Processes	regulation of protein kinase activity	19	-5.47771	-3.60933	C5AR1|CDKN1A|CSF1R|DUSP6|EREG|FGR|FPR1|IL1B|LYN|RGS2|S100A12|SLC11A1|TNF|WARS1|MAPKAPK3|UNC119|MACROH2A1|PYCARD|LILRA5
GO:0033674	GO Biological Processes	positive regulation of kinase activity	15	-4.86796	-3.07421	C5AR1|CDKN1A|CSF1R|DUSP6|EREG|FGR|FPR1|IL1B|LYN|S100A12|SLC11A1|TNF|MAPKAPK3|UNC119|LILRA5
GO:0051347	GO Biological Processes	positive regulation of transferase activity	16	-4.83984	-3.04898	C5AR1|CDKN1A|CSF1R|DUSP6|EREG|FGR|FPR1|IL1B|LYN|S100A12|SLC11A1|TNF|MAPKAPK3|UNC119|KLF4|LILRA5
GO:0071900	GO Biological Processes	regulation of protein serine/threonine kinase activity	13	-4.1071	-2.4159	C5AR1|CDKN1A|CSF1R|DUSP6|FPR1|IL1B|LYN|RGS2|S100A12|TNF|MAPKAPK3|MACROH2A1|PYCARD
GO:0045860	GO Biological Processes	positive regulation of protein kinase activity	13	-3.98358	-2.31378	C5AR1|CDKN1A|CSF1R|DUSP6|EREG|FPR1|IL1B|S100A12|SLC11A1|TNF|MAPKAPK3|UNC119|LILRA5
R-HSA-975138	Reactome Gene Sets	TRAF6 mediated induction of NFkB and MAP kinases upon TLR7/8 or 9 activation	5	-3.32278	-1.75403	CD14|DUSP6|MYD88|S100A12|MAPKAPK3
R-HSA-168181	Reactome Gene Sets	Toll Like Receptor 7/8 (TLR7/8) Cascade	5	-3.30122	-1.73559	CD14|DUSP6|MYD88|S100A12|MAPKAPK3
R-HSA-975155	Reactome Gene Sets	MyD88 dependent cascade initiated on endosome	5	-3.30122	-1.73559	CD14|DUSP6|MYD88|S100A12|MAPKAPK3
R-HSA-166058	Reactome Gene Sets	MyD88:MAL(TIRAP) cascade initiated on plasma membrane	5	-3.25887	-1.70248	CD14|DUSP6|MYD88|S100A12|MAPKAPK3
R-HSA-168188	Reactome Gene Sets	Toll Like Receptor TLR6:TLR2 Cascade	5	-3.25887	-1.70248	CD14|DUSP6|MYD88|S100A12|MAPKAPK3
R-HSA-168138	Reactome Gene Sets	Toll Like Receptor 9 (TLR9) Cascade	5	-3.21752	-1.66493	CD14|DUSP6|MYD88|S100A12|MAPKAPK3
R-HSA-168179	Reactome Gene Sets	Toll Like Receptor TLR1:TLR2 Cascade	5	-3.19721	-1.65359	CD14|DUSP6|MYD88|S100A12|MAPKAPK3
R-HSA-181438	Reactome Gene Sets	Toll Like Receptor 2 (TLR2) Cascade	5	-3.19721	-1.65359	CD14|DUSP6|MYD88|S100A12|MAPKAPK3
GO:0043405	GO Biological Processes	regulation of MAP kinase activity	9	-3.15881	-1.62758	C5AR1|DUSP6|FPR1|IL1B|LYN|RGS2|S100A12|TNF|MAPKAPK3
GO:0000187	GO Biological Processes	activation of MAPK activity	6	-3.14451	-1.614	C5AR1|DUSP6|FPR1|IL1B|TNF|MAPKAPK3
R-HSA-166016	Reactome Gene Sets	Toll Like Receptor 4 (TLR4) Cascade	5	-2.6647	-1.19878	CD14|DUSP6|MYD88|S100A12|MAPKAPK3
GO:0043406	GO Biological Processes	positive regulation of MAP kinase activity	7	-2.61453	-1.1584	C5AR1|DUSP6|FPR1|IL1B|S100A12|TNF|MAPKAPK3
GO:0071902	GO Biological Processes	positive regulation of protein serine/threonine kinase activity	8	-2.58496	-1.13244	C5AR1|CSF1R|DUSP6|FPR1|IL1B|S100A12|TNF|MAPKAPK3
R-HSA-168142	Reactome Gene Sets	Toll Like Receptor 10 (TLR10) Cascade	4	-2.52075	-1.08413	DUSP6|MYD88|S100A12|MAPKAPK3
R-HSA-168176	Reactome Gene Sets	Toll Like Receptor 5 (TLR5) Cascade	4	-2.52075	-1.08413	DUSP6|MYD88|S100A12|MAPKAPK3
R-HSA-975871	Reactome Gene Sets	MyD88 cascade initiated on plasma membrane	4	-2.52075	-1.08413	DUSP6|MYD88|S100A12|MAPKAPK3
R-HSA-166166	Reactome Gene Sets	MyD88-independent TLR4 cascade	4	-2.28415	-0.878222	CD14|DUSP6|S100A12|MAPKAPK3
R-HSA-937061	Reactome Gene Sets	TRIF(TICAM1)-mediated TLR4 signaling	4	-2.28415	-0.878222	CD14|DUSP6|S100A12|MAPKAPK3
GO:0032147	GO Biological Processes	activation of protein kinase activity	7	-2.03702	-0.668254	C5AR1|DUSP6|FPR1|IL1B|SLC11A1|TNF|MAPKAPK3
hsa04010	KEGG Pathway	MAPK signaling pathway	6	-2.03302	-0.665244	CD14|DUSP6|NR4A1|IL1B|TNF|MAPKAPK3
GO:0006959	GO Biological Processes	humoral immune response	13	-5.81271	-3.90869	C5AR1|CFD|FCN1|IL1B|CXCL8|LYZ|CFP|POU2F2|S100A8|S100A9|S100A12|SLC11A1|TNF
R-HSA-5668599	Reactome Gene Sets	RHO GTPases Activate NADPH Oxidases	4	-4.65704	-2.89009	CYBB|NCF2|S100A8|S100A9
GO:0009620	GO Biological Processes	response to fungus	5	-4.50204	-2.75916	S100A8|S100A9|S100A12|COTL1|CLEC7A
GO:0070486	GO Biological Processes	leukocyte aggregation	3	-4.15081	-2.45239	IL1B|S100A8|S100A9
GO:0050832	GO Biological Processes	defense response to fungus	4	-3.76039	-2.12023	S100A8|S100A9|S100A12|COTL1
GO:0019730	GO Biological Processes	antimicrobial humoral response	6	-3.63436	-2.0123	CXCL8|LYZ|S100A8|S100A9|S100A12|SLC11A1
R-HSA-5686938	Reactome Gene Sets	Regulation of TLR by endogenous ligand	3	-3.52256	-1.91872	CD14|S100A8|S100A9
hsa04657	KEGG Pathway	IL-17 signaling pathway	5	-3.30122	-1.73559	IL1B|CXCL8|S100A8|S100A9|TNF
R-HSA-6803157	Reactome Gene Sets	Antimicrobial peptides	4	-2.31549	-0.905776	LYZ|S100A8|S100A9|SLC11A1
GO:2001244	GO Biological Processes	positive regulation of intrinsic apoptotic signaling pathway	3	-2.04586	-0.674614	BID|S100A8|S100A9
GO:0090594	GO Biological Processes	inflammatory response to wounding	4	-5.803	-3.90067	GRN|HMOX1|TIMP1|SIGLEC10
hsa04066	KEGG Pathway	HIF-1 signaling pathway	4	-2.25354	-0.851364	CDKN1A|CYBB|HMOX1|TIMP1
GO:0006968	GO Biological Processes	cellular defense response	6	-5.7267	-3.83439	C5AR1|MNDA|NCF2|TYROBP|LILRB2|TCIRG1
GO:0030888	GO Biological Processes	regulation of B cell proliferation	5	-4.16442	-2.45746	CDKN1A|LYN|MNDA|TYROBP|TNFSF13B
GO:0030889	GO Biological Processes	negative regulation of B cell proliferation	3	-3.75399	-2.11975	LYN|MNDA|TYROBP
GO:0042100	GO Biological Processes	B cell proliferation	5	-3.25887	-1.70248	CDKN1A|LYN|MNDA|TYROBP|TNFSF13B
GO:0050869	GO Biological Processes	negative regulation of B cell activation	3	-2.92488	-1.42015	LYN|MNDA|TYROBP
GO:0042113	GO Biological Processes	B cell activation	8	-2.80185	-1.31889	CDKN1A|LYN|MNDA|NOTCH2|POU2F2|TYROBP|TCIRG1|TNFSF13B
GO:0050864	GO Biological Processes	regulation of B cell activation	5	-2.01589	-0.652534	CDKN1A|LYN|MNDA|TYROBP|TNFSF13B
GO:0032102	GO Biological Processes	negative regulation of response to external stimulus	13	-5.71984	-3.83082	AIF1|ANXA5|CDKN1A|GPX1|GRN|PLAUR|TNFRSF1B|KLF4|FGL2|LILRA2|PYCARD|SIGLEC10|CARD16
GO:0031348	GO Biological Processes	negative regulation of defense response	9	-4.30548	-2.58093	GPX1|GRN|LGALS9|TNFRSF1B|KLF4|LILRB1|FGL2|PYCARD|SIGLEC10
GO:0050728	GO Biological Processes	negative regulation of inflammatory response	6	-2.90603	-1.4043	GPX1|GRN|TNFRSF1B|KLF4|PYCARD|SIGLEC10
GO:0014900	GO Biological Processes	muscle hyperplasia	3	-5.47754	-3.60933	AIF1|HMOX1|KLF4
GO:0043500	GO Biological Processes	muscle adaptation	6	-3.65359	-2.02707	AIF1|HMOX1|IL1B|RGS2|TNFRSF1B|KLF4
GO:0043502	GO Biological Processes	regulation of muscle adaptation	4	-2.16579	-0.773649	AIF1|RGS2|TNFRSF1B|KLF4
GO:0009636	GO Biological Processes	response to toxic substance	15	-5.33733	-3.48896	CD14|CDKN1A|CYBB|GPX1|HMOX1|LYN|PSAP|RGS2|S100A8|S100A9|CCL3|SOD2|SPI1|TNF|KLF4
GO:0097237	GO Biological Processes	cellular response to toxic substance	9	-4.19525	-2.48396	CYBB|GPX1|HMOX1|PSAP|S100A9|SOD2|SPI1|TNF|KLF4
GO:0034599	GO Biological Processes	cellular response to oxidative stress	9	-3.51833	-1.91729	AIF1|CYBB|GPX1|HMOX1|NCF2|PSAP|SOD2|TNF|KLF4
GO:0046677	GO Biological Processes	response to antibiotic	9	-3.27919	-1.71744	CD14|CYBB|GPX1|HMOX1|PSAP|RGS2|S100A8|SPI1|KLF4
GO:0010035	GO Biological Processes	response to inorganic substance	12	-3.20515	-1.65781	ANXA5|TSPO|CD14|CYBB|GPX1|HMOX1|PSAP|S100A8|SOD2|TNF|KLF4|TCIRG1
GO:1902882	GO Biological Processes	regulation of response to oxidative stress	5	-3.19721	-1.65359	GPX1|PSAP|SOD2|TNF|MACROH2A1
GO:0097755	GO Biological Processes	positive regulation of blood vessel diameter	4	-3.10797	-1.58388	GPX1|HMOX1|RGS2|SOD2
GO:0035690	GO Biological Processes	cellular response to drug	9	-2.91866	-1.41461	AIF1|CYBB|GNAI2|HMOX1|IL1B|PSAP|SPI1|TNF|KLF4
GO:0006979	GO Biological Processes	response to oxidative stress	10	-2.85335	-1.35881	AIF1|CYBB|GPX1|HMOX1|NCF2|PSAP|SOD2|TNF|KLF4|MACROH2A1
GO:0042311	GO Biological Processes	vasodilation	3	-2.84237	-1.35293	GPX1|RGS2|SOD2
GO:1900407	GO Biological Processes	regulation of cellular response to oxidative stress	4	-2.46644	-1.0367	GPX1|PSAP|SOD2|TNF
GO:0098869	GO Biological Processes	cellular oxidant detoxification	4	-2.23849	-0.837388	GPX1|S100A9|SOD2|TNF
GO:0000302	GO Biological Processes	response to reactive oxygen species	6	-2.21652	-0.817014	GPX1|HMOX1|PSAP|SOD2|TNF|KLF4
GO:1903202	GO Biological Processes	negative regulation of oxidative stress-induced cell death	3	-2.14823	-0.758692	GPX1|PSAP|SOD2
GO:1900408	GO Biological Processes	negative regulation of cellular response to oxidative stress	3	-2.12695	-0.739487	GPX1|PSAP|SOD2
GO:1990748	GO Biological Processes	cellular detoxification	4	-2.09698	-0.712085	GPX1|S100A9|SOD2|TNF
GO:1902883	GO Biological Processes	negative regulation of response to oxidative stress	3	-2.08563	-0.703811	GPX1|PSAP|SOD2
GO:0043269	GO Biological Processes	regulation of ion transport	17	-5.03744	-3.22486	TSPO|SLC31A2|CTSS|CYBB|GNAI2|IL1B|LGALS3|LYN|RGS2|CCL3|BEST1|LILRB2|TCIRG1|LILRB1|LILRA2|PRELID1|LILRA5
GO:0051924	GO Biological Processes	regulation of calcium ion transport	10	-4.89262	-3.09623	TSPO|GNAI2|LGALS3|LYN|CCL3|BEST1|LILRB2|LILRB1|LILRA2|LILRA5
GO:0010959	GO Biological Processes	regulation of metal ion transport	11	-3.96053	-2.29369	TSPO|SLC31A2|GNAI2|LGALS3|LYN|CCL3|BEST1|LILRB2|LILRB1|LILRA2|LILRA5
GO:0070838	GO Biological Processes	divalent metal ion transport	12	-3.79729	-2.15435	ANXA5|TSPO|GNAI2|LGALS3|LYN|CCL3|SLC11A1|BEST1|LILRB2|LILRB1|LILRA2|LILRA5
GO:0072511	GO Biological Processes	divalent inorganic cation transport	12	-3.74785	-2.11502	ANXA5|TSPO|GNAI2|LGALS3|LYN|CCL3|SLC11A1|BEST1|LILRB2|LILRB1|LILRA2|LILRA5
GO:0006816	GO Biological Processes	calcium ion transport	11	-3.59688	-1.98167	ANXA5|TSPO|GNAI2|LGALS3|LYN|CCL3|BEST1|LILRB2|LILRB1|LILRA2|LILRA5
GO:0043270	GO Biological Processes	positive regulation of ion transport	8	-3.13411	-1.60575	TSPO|CTSS|IL1B|LGALS3|CCL3|LILRA2|PRELID1|LILRA5
GO:0051928	GO Biological Processes	positive regulation of calcium ion transport	5	-2.75527	-1.27679	TSPO|LGALS3|CCL3|LILRA2|LILRA5
GO:0007229	GO Biological Processes	integrin-mediated signaling pathway	7	-5.03278	-3.22295	FCER1G|FGR|HCK|TIMP1|TYROBP|ZYX|PRAM1
GO:0034612	GO Biological Processes	response to tumor necrosis factor	11	-4.87814	-3.08307	ASAH1|CASP1|CD14|CXCL8|CCL3|TNF|TNFRSF1B|TNFSF13B|PYCARD|CXCL16|CARD16
GO:0071356	GO Biological Processes	cellular response to tumor necrosis factor	9	-3.65805	-2.03064	ASAH1|CASP1|CXCL8|CCL3|TNF|TNFRSF1B|TNFSF13B|PYCARD|CARD16
GO:0048305	GO Biological Processes	immunoglobulin secretion	3	-3.26959	-1.71015	POU2F2|TNF|TNFSF13B
GO:0010803	GO Biological Processes	regulation of tumor necrosis factor-mediated signaling pathway	4	-3.05326	-1.53269	CASP1|TNF|PYCARD|CARD16
GO:0033209	GO Biological Processes	tumor necrosis factor-mediated signaling pathway	6	-2.93257	-1.4258	CASP1|TNF|TNFRSF1B|TNFSF13B|PYCARD|CARD16
GO:0009615	GO Biological Processes	response to virus	11	-4.68928	-2.91985	LYST|FGR|IL1B|LGALS9|OAS1|TNF|IFITM3|NPC2|LILRB1|FGL2|PYCARD
GO:0002831	GO Biological Processes	regulation of response to biotic stimulus	7	-4.24425	-2.52969	GRN|IL1B|LILRB1|FGL2|LILRA2|PYCARD|CARD16
GO:0051607	GO Biological Processes	defense response to virus	7	-2.82094	-1.33475	LYST|IL1B|OAS1|IFITM3|LILRB1|FGL2|PYCARD
GO:0050688	GO Biological Processes	regulation of defense response to virus	4	-2.7622	-1.28245	IL1B|LILRB1|FGL2|PYCARD
GO:0050691	GO Biological Processes	regulation of defense response to virus by host	3	-2.65855	-1.19509	IL1B|LILRB1|PYCARD
hsa04623	KEGG Pathway	Cytosolic DNA-sensing pathway	3	-2.00754	-0.646611	CASP1|IL1B|PYCARD
GO:0051346	GO Biological Processes	negative regulation of hydrolase activity	13	-4.58426	-2.82894	APLP2|CST3|CSTA|GNAI2|GPX1|LGALS3|SERPINA1|PLAUR|RGS2|TIMP1|TNF|KLF4|CARD16
GO:0010951	GO Biological Processes	negative regulation of endopeptidase activity	9	-4.15502	-2.45239	APLP2|CST3|CSTA|GPX1|SERPINA1|PLAUR|TIMP1|KLF4|CARD16
GO:0010466	GO Biological Processes	negative regulation of peptidase activity	9	-3.99977	-2.326	APLP2|CST3|CSTA|GPX1|SERPINA1|PLAUR|TIMP1|KLF4|CARD16
GO:0045861	GO Biological Processes	negative regulation of proteolysis	9	-2.96807	-1.45789	APLP2|CST3|CSTA|GPX1|SERPINA1|PLAUR|TIMP1|KLF4|CARD16
GO:0043154	GO Biological Processes	negative regulation of cysteine-type endopeptidase activity involved in apoptotic process	4	-2.53934	-1.09631	GPX1|PLAUR|KLF4|CARD16
GO:2000117	GO Biological Processes	negative regulation of cysteine-type endopeptidase activity	4	-2.39725	-0.978192	GPX1|PLAUR|KLF4|CARD16
hsa05014	KEGG Pathway	Amyotrophic lateral sclerosis (ALS)	5	-4.5435	-2.79708	BID|CASP1|GPX1|TNF|TNFRSF1B
R-HSA-5633008	Reactome Gene Sets	TP53 Regulates Transcription of Cell Death Genes	3	-2.44247	-1.01727	BID|CASP1|PRELID1
GO:0097066	GO Biological Processes	response to thyroid hormone	4	-4.51351	-2.76945	ANXA5|CTSB|CTSH|CTSS
hsa04210	KEGG Pathway	Apoptosis	7	-4.26416	-2.54629	BCL2A1|BID|CTSB|CTSH|CTSS|TNF|TNFSF10
GO:0097067	GO Biological Processes	cellular response to thyroid hormone stimulus	3	-3.75399	-2.11975	CTSB|CTSH|CTSS
GO:0030574	GO Biological Processes	collagen catabolic process	4	-3.48651	-1.88858	CST3|CTSB|CTSS|VSIR
GO:0032963	GO Biological Processes	collagen metabolic process	4	-2.05741	-0.682167	CST3|CTSB|CTSS|VSIR
hsa05202	KEGG Pathway	Transcriptional misregulation in cancer	8	-4.38778	-2.65758	BCL2A1|CD14|CDKN1A|CSF1R|DUSP6|CXCL8|SPI1|NFKBIZ
hsa05200	KEGG Pathway	Pathways in cancer	8	-2.16676	-0.773649	BID|CDKN1A|CSF1R|CSF3R|GNAI2|CXCL8|SPI1|TCF7L2
GO:0071901	GO Biological Processes	negative regulation of protein serine/threonine kinase activity	7	-4.12819	-2.43187	CDKN1A|DUSP6|IL1B|LYN|RGS2|MACROH2A1|PYCARD
GO:0031400	GO Biological Processes	negative regulation of protein modification process	14	-3.92136	-2.26134	TSPO|CDKN1A|DUSP6|GNAI2|IL1B|LGALS3|LYN|RGS2|SPI1|TNF|WARS1|KLF4|MACROH2A1|PYCARD
GO:0045936	GO Biological Processes	negative regulation of phosphate metabolic process	13	-3.58907	-1.97665	TSPO|CDKN1A|DUSP6|GNAI2|IL1B|LGALS3|LYN|RGS2|TNF|WARS1|KLF4|MACROH2A1|PYCARD
GO:0006469	GO Biological Processes	negative regulation of protein kinase activity	8	-3.58588	-1.97432	CDKN1A|DUSP6|IL1B|LYN|RGS2|WARS1|MACROH2A1|PYCARD
GO:0010563	GO Biological Processes	negative regulation of phosphorus metabolic process	13	-3.58196	-1.97126	TSPO|CDKN1A|DUSP6|GNAI2|IL1B|LGALS3|LYN|RGS2|TNF|WARS1|KLF4|MACROH2A1|PYCARD
GO:0033673	GO Biological Processes	negative regulation of kinase activity	8	-3.32658	-1.75704	CDKN1A|DUSP6|IL1B|LYN|RGS2|WARS1|MACROH2A1|PYCARD
GO:0051348	GO Biological Processes	negative regulation of transferase activity	8	-3.02412	-1.50704	CDKN1A|DUSP6|IL1B|LYN|RGS2|WARS1|MACROH2A1|PYCARD
GO:0043407	GO Biological Processes	negative regulation of MAP kinase activity	4	-2.65648	-1.19364	DUSP6|IL1B|LYN|RGS2
GO:0001933	GO Biological Processes	negative regulation of protein phosphorylation	9	-2.47735	-1.04476	CDKN1A|DUSP6|IL1B|LYN|RGS2|WARS1|KLF4|MACROH2A1|PYCARD
GO:0042326	GO Biological Processes	negative regulation of phosphorylation	9	-2.23372	-0.833146	CDKN1A|DUSP6|IL1B|LYN|RGS2|WARS1|KLF4|MACROH2A1|PYCARD
GO:0043409	GO Biological Processes	negative regulation of MAPK cascade	5	-2.01589	-0.652534	DUSP6|IL1B|LYN|RGS2|KLF4
GO:0031334	GO Biological Processes	positive regulation of protein complex assembly	9	-3.91316	-2.25411	RHOC|BID|CAPG|HCK|TNF|VASP|WARS1|PYCARD|CLEC7A
GO:0071801	GO Biological Processes	regulation of podosome assembly	3	-3.75399	-2.11975	CAPG|HCK|TNF
GO:0071800	GO Biological Processes	podosome assembly	3	-3.45421	-1.86458	CAPG|HCK|TNF
GO:0010638	GO Biological Processes	positive regulation of organelle organization	13	-3.32999	-1.75774	RHOC|BID|CAPG|EREG|GRN|HCK|IL1B|PLAUR|TNF|VASP|TNFSF10|MACROH2A1|PYCARD
GO:0032956	GO Biological Processes	regulation of actin cytoskeleton organization	9	-3.13186	-1.60422	RHOC|CAPG|CSF1R|HCK|LRP1|NOTCH2|VASP|COTL1|PYCARD
GO:0030036	GO Biological Processes	actin cytoskeleton organization	13	-3.06241	-1.53973	AIF1|RHOC|CAPG|CSF1R|HCK|LRP1|NOTCH2|TNF|TYROBP|VASP|ZYX|COTL1|PYCARD
GO:0051493	GO Biological Processes	regulation of cytoskeleton organization	11	-2.85527	-1.35991	RHOC|CAPG|CSF1R|HCK|LRP1|NOTCH2|S100A8|S100A9|VASP|COTL1|PYCARD
GO:0032970	GO Biological Processes	regulation of actin filament-based process	9	-2.76139	-1.28228	RHOC|CAPG|CSF1R|HCK|LRP1|NOTCH2|VASP|COTL1|PYCARD
GO:0043254	GO Biological Processes	regulation of protein complex assembly	10	-2.74945	-1.27224	RHOC|BID|CAPG|HCK|TNF|VASP|WARS1|COTL1|PYCARD|CLEC7A
GO:0030041	GO Biological Processes	actin filament polymerization	6	-2.74232	-1.26575	AIF1|CAPG|HCK|VASP|COTL1|PYCARD
GO:0030029	GO Biological Processes	actin filament-based process	13	-2.56155	-1.1143	AIF1|RHOC|CAPG|CSF1R|HCK|LRP1|NOTCH2|TNF|TYROBP|VASP|ZYX|COTL1|PYCARD
GO:0090066	GO Biological Processes	regulation of anatomical structure size	10	-2.50576	-1.07029	CAPG|GPX1|HCK|HMOX1|LRP1|RGS2|SOD2|VASP|COTL1|PYCARD
GO:0008154	GO Biological Processes	actin polymerization or depolymerization	6	-2.4439	-1.01727	AIF1|CAPG|HCK|VASP|COTL1|PYCARD
GO:0030833	GO Biological Processes	regulation of actin filament polymerization	5	-2.24278	-0.841139	CAPG|HCK|VASP|COTL1|PYCARD
GO:0007015	GO Biological Processes	actin filament organization	8	-2.12286	-0.735907	AIF1|RHOC|CAPG|HCK|VASP|ZYX|COTL1|PYCARD
GO:0008064	GO Biological Processes	regulation of actin polymerization or depolymerization	5	-2.06438	-0.687371	CAPG|HCK|VASP|COTL1|PYCARD
GO:0030832	GO Biological Processes	regulation of actin filament length	5	-2.05455	-0.680309	CAPG|HCK|VASP|COTL1|PYCARD
R-HSA-3299685	Reactome Gene Sets	Detoxification of Reactive Oxygen Species	4	-3.89436	-2.23819	CYBB|GPX1|NCF2|SOD2
R-HSA-1236975	Reactome Gene Sets	Antigen processing-Cross presentation	5	-3.17714	-1.63866	CD14|CTSS|CYBB|MYD88|NCF2
GO:0045454	GO Biological Processes	cell redox homeostasis	4	-2.69782	-1.22817	CYBB|GPX1|NCF2|SLC11A1
GO:0042590	GO Biological Processes	antigen processing and presentation of exogenous peptide antigen via MHC class I	4	-2.63626	-1.17526	CYBB|FCER1G|NCF2|IFI30
GO:0048010	GO Biological Processes	vascular endothelial growth factor receptor signaling pathway	4	-2.33145	-0.920642	CYBB|IL1B|NCF2|MAPKAPK3
GO:0002474	GO Biological Processes	antigen processing and presentation of peptide antigen via MHC class I	4	-2.31549	-0.905776	CYBB|FCER1G|NCF2|IFI30
hsa04670	KEGG Pathway	Leukocyte transendothelial migration	4	-2.07046	-0.690675	CYBB|GNAI2|NCF2|VASP
GO:0034142	GO Biological Processes	toll-like receptor 4 signaling pathway	4	-3.89436	-2.23819	CD14|LGALS9|LYN|LILRA2
GO:0034122	GO Biological Processes	negative regulation of toll-like receptor signaling pathway	3	-2.53009	-1.08998	CD14|LYN|LILRA2
GO:0009408	GO Biological Processes	response to heat	5	-2.08426	-0.702945	CD14|CDKN1A|HMOX1|HSBP1|LYN
GO:0002220	GO Biological Processes	innate immune response activating cell surface receptor signaling pathway	4	-2.0445	-0.674243	FCER1G|FCN1|LYN|LILRA2
GO:0035821	GO Biological Processes	modification of morphology or physiology of other organism	7	-3.79447	-2.15245	CSF1R|LYZ|S100A9|S100A12|CCL3|CLEC7A|MPEG1
GO:0031640	GO Biological Processes	killing of cells of other organism	3	-2.02652	-0.660714	LYZ|S100A12|CLEC7A
GO:0044364	GO Biological Processes	disruption of cells of other organism	3	-2.02652	-0.660714	LYZ|S100A12|CLEC7A
GO:0006914	GO Biological Processes	autophagy	12	-3.63557	-2.0123	TSPO|HMOX1|PSAP|S100A8|S100A9|ATP6V0D1|NAMPT|TCIRG1|PYCARD|RAB24|ATG3|VMP1
GO:0061919	GO Biological Processes	process utilizing autophagic mechanism	12	-3.63557	-2.0123	TSPO|HMOX1|PSAP|S100A8|S100A9|ATP6V0D1|NAMPT|TCIRG1|PYCARD|RAB24|ATG3|VMP1
GO:0051129	GO Biological Processes	negative regulation of cellular component organization	15	-3.60752	-1.98811	TSPO|CAPG|CST3|GPX1|LGALS3|LRP1|SPI1|TNF|TNFRSF1B|UNC119|MACROH2A1|LILRB2|LILRB1|PRELID1|ATG3
GO:0045806	GO Biological Processes	negative regulation of endocytosis	4	-2.82964	-1.34281	LGALS3|UNC119|LILRB1|ATG3
GO:0097305	GO Biological Processes	response to alcohol	8	-3.59837	-1.98167	CD14|CDKN1A|CYBB|RGS2|S100A8|CCL3|SPI1|KLF4
GO:0045471	GO Biological Processes	response to ethanol	5	-2.70935	-1.23845	CD14|CYBB|RGS2|S100A8|SPI1
GO:0022617	GO Biological Processes	extracellular matrix disassembly	5	-3.55424	-1.94527	CAPG|CST3|CTSS|LRP1|TIMP1
GO:0030198	GO Biological Processes	extracellular matrix organization	9	-2.91053	-1.40715	CAPG|VCAN|CST3|CTSS|LRP1|TGFBI|TIMP1|TNF|TNFRSF1B
GO:1903053	GO Biological Processes	regulation of extracellular matrix organization	3	-2.53009	-1.08998	CST3|LRP1|TNFRSF1B
GO:0043062	GO Biological Processes	extracellular structure organization	9	-2.50409	-1.0692	CAPG|VCAN|CST3|CTSS|LRP1|TGFBI|TIMP1|TNF|TNFRSF1B
GO:0002437	GO Biological Processes	inflammatory response to antigenic stimulus	4	-3.52278	-1.91872	CD68|FCER1G|GPX1|TNF
GO:2000010	GO Biological Processes	positive regulation of protein localization to cell surface	3	-3.52256	-1.91872	FCER1G|TNF|TYROBP
hsa04650	KEGG Pathway	Natural killer cell mediated cytotoxicity	6	-3.45149	-1.8631	BID|FCER1G|FCGR3A|TNF|TYROBP|TNFSF10
GO:0002861	GO Biological Processes	regulation of inflammatory response to antigenic stimulus	3	-3.21383	-1.66425	FCER1G|GPX1|TNF
GO:0034394	GO Biological Processes	protein localization to cell surface	4	-3.00051	-1.48897	FCER1G|FCN1|TNF|TYROBP
hsa05310	KEGG Pathway	Asthma	3	-2.8829	-1.38422	FCER1G|HLA-DRB5|TNF
GO:0055094	GO Biological Processes	response to lipoprotein particle	3	-2.84237	-1.35293	CD68|FCER1G|MYD88
hsa04071	KEGG Pathway	Sphingolipid signaling pathway	5	-2.8348	-1.34601	ASAH1|BID|FCER1G|GNAI2|TNF
GO:0071402	GO Biological Processes	cellular response to lipoprotein particle stimulus	3	-2.76531	-1.28492	CD68|FCER1G|MYD88
GO:2000008	GO Biological Processes	regulation of protein localization to cell surface	3	-2.56087	-1.1143	FCER1G|TNF|TYROBP
GO:0009895	GO Biological Processes	negative regulation of catabolic process	9	-3.45635	-1.86458	TSPO|CST3|HMOX1|IL1B|MYD88|SLC11A1|TIMP1|TNF|NAMPT
GO:0007568	GO Biological Processes	aging	9	-3.34658	-1.76912	BCL2A1|TSPO|CD68|CDKN1A|LRP1|SOD2|TIMP1|TNFRSF1B|NAMPT
GO:0031330	GO Biological Processes	negative regulation of cellular catabolic process	7	-2.55943	-1.11345	TSPO|CST3|HMOX1|MYD88|SLC11A1|TIMP1|NAMPT
GO:0071214	GO Biological Processes	cellular response to abiotic stimulus	7	-2.03702	-0.668254	TSPO|CASP1|CDKN1A|IL1B|MYD88|NAMPT|CARD16
GO:0104004	GO Biological Processes	cellular response to environmental stimulus	7	-2.03702	-0.668254	TSPO|CASP1|CDKN1A|IL1B|MYD88|NAMPT|CARD16
GO:0007565	GO Biological Processes	female pregnancy	7	-3.37772	-1.79705	CTSB|IL1B|LGALS9|RGS2|TIMP1|NAMPT|VMP1
GO:0044706	GO Biological Processes	multi-multicellular organism process	7	-3.00545	-1.49322	CTSB|IL1B|LGALS9|RGS2|TIMP1|NAMPT|VMP1
GO:0007566	GO Biological Processes	embryo implantation	3	-2.2614	-0.858155	IL1B|TIMP1|VMP1
GO:0006907	GO Biological Processes	pinocytosis	3	-3.32806	-1.75774	PPT1|MAPKAPK3|PYCARD
GO:0030149	GO Biological Processes	sphingolipid catabolic process	3	-2.84237	-1.35293	ASAH1|PPT1|PSAP
GO:0046466	GO Biological Processes	membrane lipid catabolic process	3	-2.69305	-1.22464	ASAH1|PPT1|PSAP
R-HSA-166663	Reactome Gene Sets	Initial triggering of complement	3	-3.26959	-1.71015	CFD|FCN1|CFP
R-HSA-166658	Reactome Gene Sets	Complement cascade	4	-3.13611	-1.60703	C5AR1|CFD|FCN1|CFP
hsa04610	KEGG Pathway	Complement and coagulation cascades	4	-2.63626	-1.17526	C5AR1|CFD|SERPINA1|PLAUR
GO:0006956	GO Biological Processes	complement activation	5	-2.0943	-0.710434	C5AR1|CFD|FCN1|IL1B|CFP
GO:0016485	GO Biological Processes	protein processing	9	-3.26027	-1.70248	C5AR1|CASP1|CTSH|CTSS|IL1B|CFP|PYCARD|VSIR|CARD16
GO:0051604	GO Biological Processes	protein maturation	9	-2.68676	-1.21898	C5AR1|CASP1|CTSH|CTSS|IL1B|CFP|PYCARD|VSIR|CARD16
GO:0031638	GO Biological Processes	zymogen activation	3	-2.19209	-0.795751	CTSH|PYCARD|VSIR
GO:0061098	GO Biological Processes	positive regulation of protein tyrosine kinase activity	4	-3.22386	-1.66975	CSF1R|EREG|UNC119|LILRA5
GO:0018108	GO Biological Processes	peptidyl-tyrosine phosphorylation	9	-2.95976	-1.45027	CSF1R|EREG|FGR|HCK|LYN|TNF|UNC119|ABI3|LILRA5
GO:0018212	GO Biological Processes	peptidyl-tyrosine modification	9	-2.93501	-1.42757	CSF1R|EREG|FGR|HCK|LYN|TNF|UNC119|ABI3|LILRA5
GO:0050731	GO Biological Processes	positive regulation of peptidyl-tyrosine phosphorylation	6	-2.62579	-1.1677	CSF1R|EREG|LYN|TNF|UNC119|LILRA5
GO:0061097	GO Biological Processes	regulation of protein tyrosine kinase activity	4	-2.46644	-1.0367	CSF1R|EREG|UNC119|LILRA5
GO:0050730	GO Biological Processes	regulation of peptidyl-tyrosine phosphorylation	6	-2.02518	-0.659858	CSF1R|EREG|LYN|TNF|UNC119|LILRA5
GO:0060191	GO Biological Processes	regulation of lipase activity	5	-3.17714	-1.63866	RHOC|C5AR1|LRP1|PPT1|RGS2
GO:0010517	GO Biological Processes	regulation of phospholipase activity	4	-2.80681	-1.32256	C5AR1|LRP1|PPT1|RGS2
GO:0040008	GO Biological Processes	regulation of growth	11	-2.0591	-0.68335	CDKN1A|DUSP6|LRP1|NOTCH2|PPT1|RGS2|S100A8|S100A9|SGK1|TKT|CXCL16
GO:0001558	GO Biological Processes	regulation of cell growth	8	-2.02059	-0.655761	CDKN1A|LRP1|PPT1|RGS2|S100A8|S100A9|SGK1|CXCL16
GO:0008360	GO Biological Processes	regulation of cell shape	6	-3.17464	-1.63689	RHOC|CSF1R|FGR|HCK|CCL3|LST1
GO:1903306	GO Biological Processes	negative regulation of regulated secretory pathway	3	-3.16054	-1.6286	GNAI2|HMOX1|LGALS9
GO:0045920	GO Biological Processes	negative regulation of exocytosis	3	-2.76531	-1.28492	GNAI2|HMOX1|LGALS9
GO:0045744	GO Biological Processes	negative regulation of G protein-coupled receptor signaling pathway	3	-2.19209	-0.795751	GNAI2|CXCL8|RGS2
GO:0007588	GO Biological Processes	excretion	3	-2.00754	-0.646611	GNAI2|HMOX1|PSAP
GO:0045444	GO Biological Processes	fat cell differentiation	7	-2.98285	-1.47199	GPX1|NR4A1|RGS2|TCF7L2|TNF|KLF4|ZNF385A
GO:0043491	GO Biological Processes	protein kinase B signaling	7	-2.53247	-1.09061	EREG|GPX1|IL1B|CCL3|TCF7L2|TNF|KLF4
GO:0030855	GO Biological Processes	epithelial cell differentiation	13	-2.46112	-1.03365	ASAH1|CDKN1A|CSTA|CTSB|EREG|GPX1|IL1B|LGALS3|PSAP|TNF|KLF4|MACROH2A1|RILPL2
GO:0002064	GO Biological Processes	epithelial cell development	6	-2.41372	-0.991878	CDKN1A|GPX1|IL1B|PSAP|TNF|RILPL2
GO:0051896	GO Biological Processes	regulation of protein kinase B signaling	6	-2.12209	-0.735652	EREG|GPX1|CCL3|TCF7L2|TNF|KLF4
GO:0051897	GO Biological Processes	positive regulation of protein kinase B signaling	5	-2.0943	-0.710434	EREG|GPX1|CCL3|TCF7L2|TNF
GO:0042168	GO Biological Processes	heme metabolic process	3	-2.8829	-1.38422	BLVRB|TSPO|HMOX1
GO:0006778	GO Biological Processes	porphyrin-containing compound metabolic process	3	-2.62505	-1.1677	BLVRB|TSPO|HMOX1
GO:0051186	GO Biological Processes	cofactor metabolic process	11	-2.44267	-1.01727	BLVRB|TSPO|CYBB|GPX1|HMOX1|PGD|PPT1|TALDO1|TKT|NAMPT|SLC2A6
GO:0010823	GO Biological Processes	negative regulation of mitochondrion organization	3	-2.16993	-0.775702	TSPO|GPX1|PRELID1
GO:0033013	GO Biological Processes	tetrapyrrole metabolic process	3	-2.06556	-0.687371	BLVRB|TSPO|HMOX1
GO:0097242	GO Biological Processes	amyloid-beta clearance	3	-2.69305	-1.22464	C5AR1|LRP1|TNF
GO:0072659	GO Biological Processes	protein localization to plasma membrane	7	-2.59598	-1.14166	FCER1G|LGALS3|LRP1|TNF|RAB31|PRAM1|RILPL2
GO:1990778	GO Biological Processes	protein localization to cell periphery	7	-2.1772	-0.781918	FCER1G|LGALS3|LRP1|TNF|RAB31|PRAM1|RILPL2
GO:1903078	GO Biological Processes	positive regulation of protein localization to plasma membrane	3	-2.14823	-0.758692	LGALS3|LRP1|TNF
GO:0006470	GO Biological Processes	protein dephosphorylation	7	-2.11971	-0.733789	DUSP6|GNAI2|LGALS3|PTPRE|TNF|LILRB2|CPPED1
GO:0032515	GO Biological Processes	negative regulation of phosphoprotein phosphatase activity	3	-2.06556	-0.687371	GNAI2|LGALS3|TNF
GO:1904377	GO Biological Processes	positive regulation of protein localization to cell periphery	3	-2.00754	-0.646611	LGALS3|LRP1|TNF
GO:2000249	GO Biological Processes	regulation of actin cytoskeleton reorganization	3	-2.65855	-1.19509	CSF1R|HCK|NOTCH2
GO:0048771	GO Biological Processes	tissue remodeling	5	-2.05455	-0.680309	CSF1R|CST3|NOTCH2|TIMP1|TCIRG1
GO:0048145	GO Biological Processes	regulation of fibroblast proliferation	4	-2.55819	-1.1134	CDKN1A|EREG|FTH1|S100A6
GO:0048144	GO Biological Processes	fibroblast proliferation	4	-2.53934	-1.09631	CDKN1A|EREG|FTH1|S100A6
GO:0048146	GO Biological Processes	positive regulation of fibroblast proliferation	3	-2.2614	-0.858155	CDKN1A|EREG|S100A6
GO:0007034	GO Biological Processes	vacuolar transport	5	-2.47147	-1.03948	LYST|GRN|LRP1|PSAP|ATP6V0D1
GO:0007033	GO Biological Processes	vacuole organization	5	-2.23166	-0.831615	LYST|GRN|PPT1|ATG3|VMP1
GO:0007041	GO Biological Processes	lysosomal transport	4	-2.16579	-0.773649	LYST|GRN|LRP1|PSAP
GO:0007040	GO Biological Processes	lysosome organization	3	-2.04586	-0.674614	LYST|GRN|PPT1
GO:0080171	GO Biological Processes	lytic vacuole organization	3	-2.04586	-0.674614	LYST|GRN|PPT1
GO:0051260	GO Biological Processes	protein homooligomerization	8	-2.46968	-1.0388	RHOC|BID|FCER1G|GLUL|HMOX1|SOD2|VASP|PYCARD
GO:0043277	GO Biological Processes	apoptotic cell clearance	3	-2.38765	-0.969704	FCN1|LRP1|TYROBP
GO:0002832	GO Biological Processes	negative regulation of response to biotic stimulus	3	-2.36122	-0.947132	FGL2|LILRA2|CARD16
GO:1901570	GO Biological Processes	fatty acid derivative biosynthetic process	4	-2.26875	-0.863364	IL1B|LTA4H|PPT1|TBXAS1
GO:1901568	GO Biological Processes	fatty acid derivative metabolic process	5	-2.16664	-0.773649	GPX1|IL1B|LTA4H|PPT1|TBXAS1
GO:0046456	GO Biological Processes	icosanoid biosynthetic process	3	-2.14823	-0.758692	IL1B|LTA4H|TBXAS1
R-HSA-2142753	Reactome Gene Sets	Arachidonic acid metabolism	3	-2.08563	-0.703811	GPX1|LTA4H|TBXAS1
GO:0006690	GO Biological Processes	icosanoid metabolic process	4	-2.0445	-0.674243	GPX1|IL1B|LTA4H|TBXAS1
hsa00590	KEGG Pathway	Arachidonic acid metabolism	3	-2.02652	-0.660714	GPX1|LTA4H|TBXAS1
GO:0045840	GO Biological Processes	positive regulation of mitotic nuclear division	3	-2.2147	-0.816253	EREG|IL1B|MACROH2A1
GO:0050851	GO Biological Processes	antigen receptor-mediated signaling pathway	7	-2.15541	-0.763794	HLA-DRB5|LGALS3|LYN|MNDA|THEMIS2|NFKBIZ|PRAM1
